# Supplementary material for: The design, synthesis and evaluation of selenium-containing 4-anilinoquinazoline hybrids as anticancer agents and a study of their mechanism
Source: Royal Society of Chemistry journal article supplement (doi:10.1039/c8ob00875b), 2018-01-01
Supplement: c8ob00875b1.pdf [file c8ob00875b1.pdf]

## Supporting Information

<sup>a</sup>School of Pharmaceutical Sciences, Sun Yat-sen University, Guangzhou, 510006, China

SI1. NMR spectrums of target compounds (2 – 16)

SI2. NMR spectrums of intermediate compounds (17 – 41)

SI3. HPLC chromatograms of target compounds (42 – 49)

SI4. HR-MS of target compounds (50 – 59)

SI5. LR-MS of target compounds(60 – 74)

## SI1. NMR spectrums of target compounds

### 5a

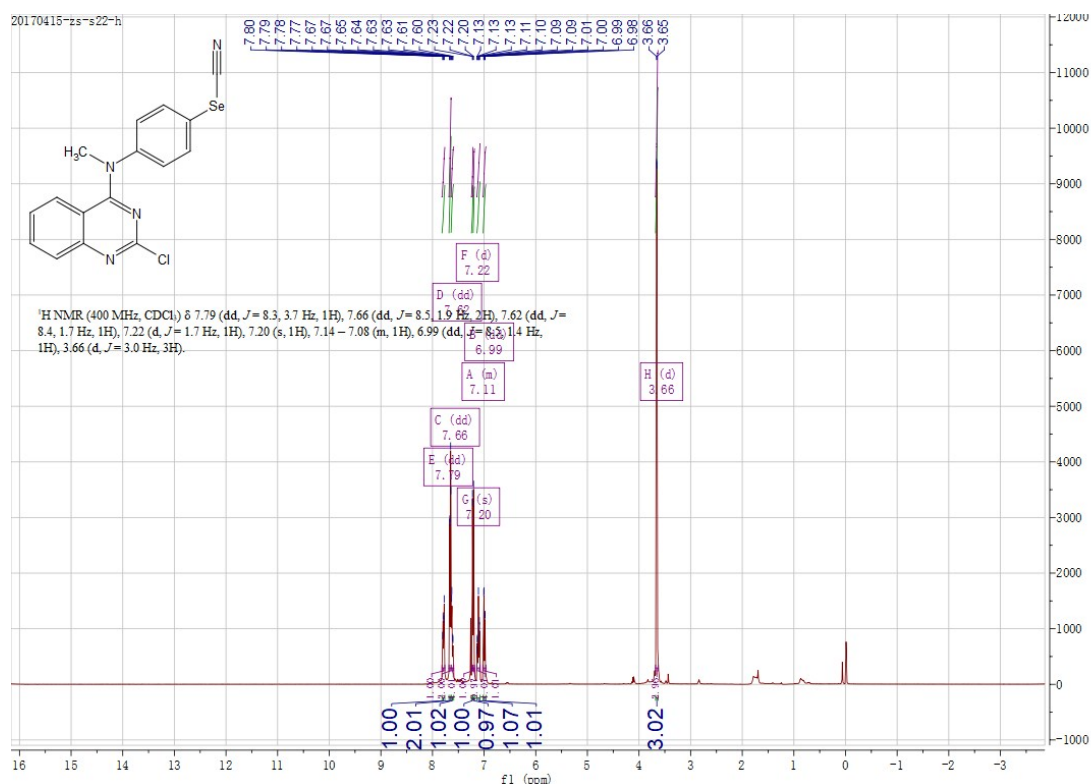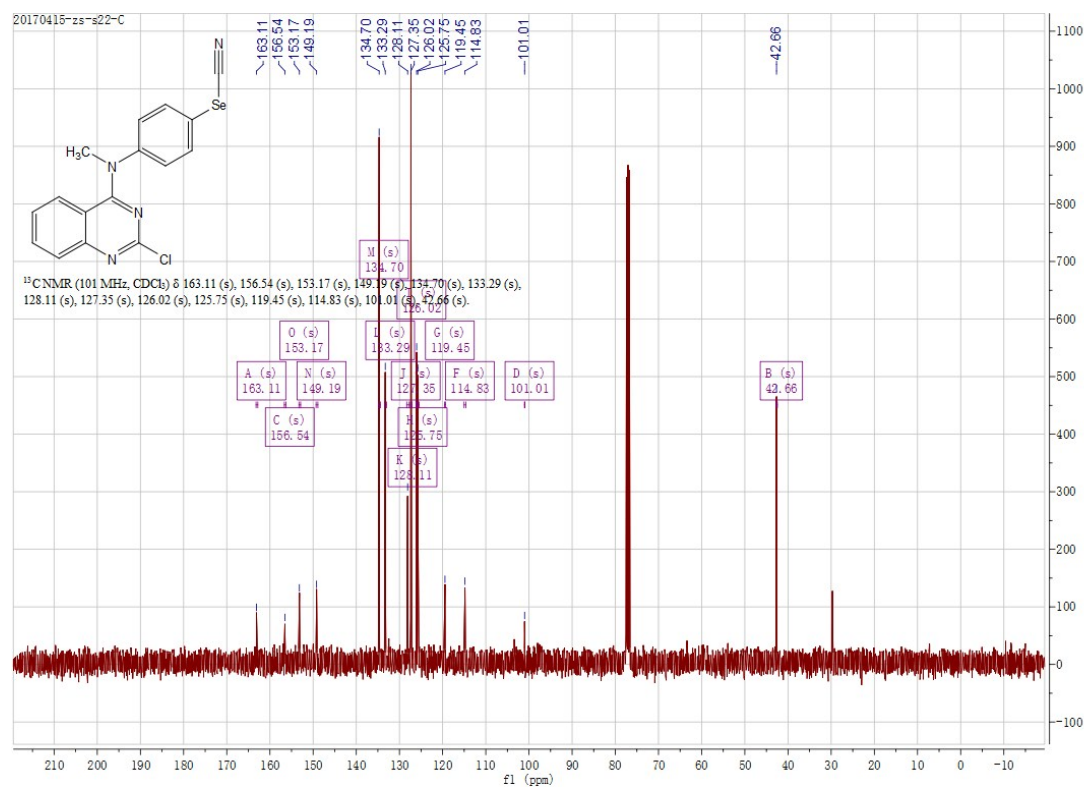

5b

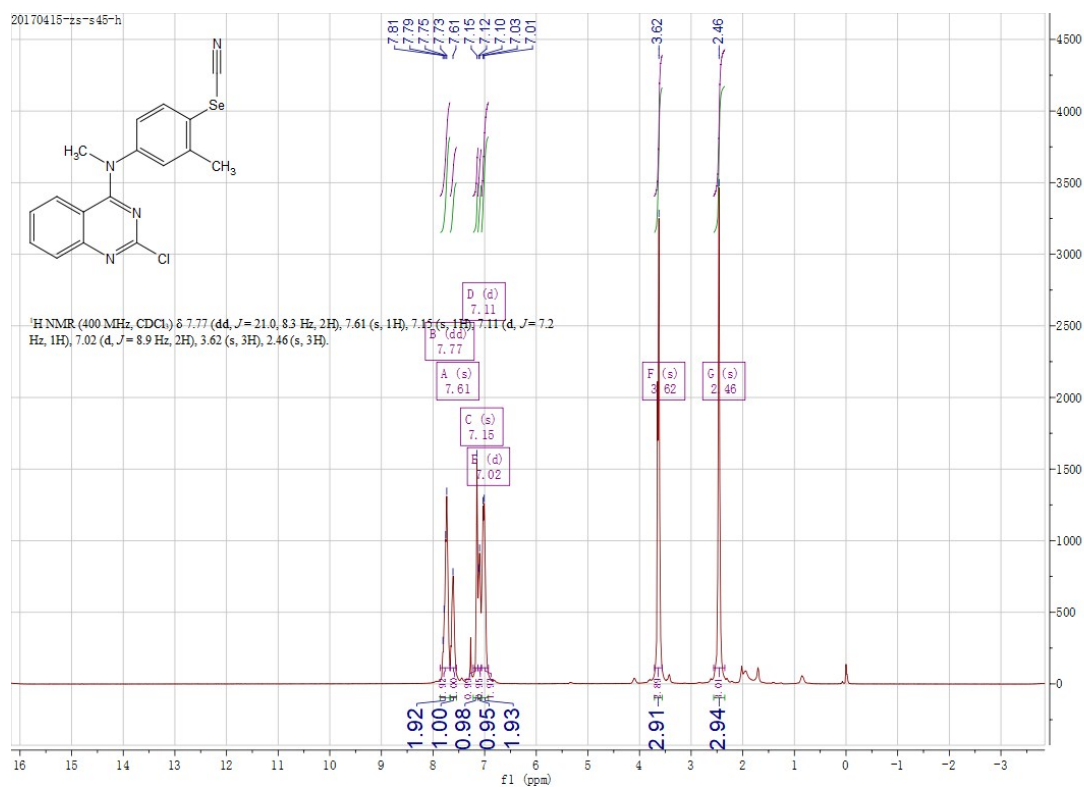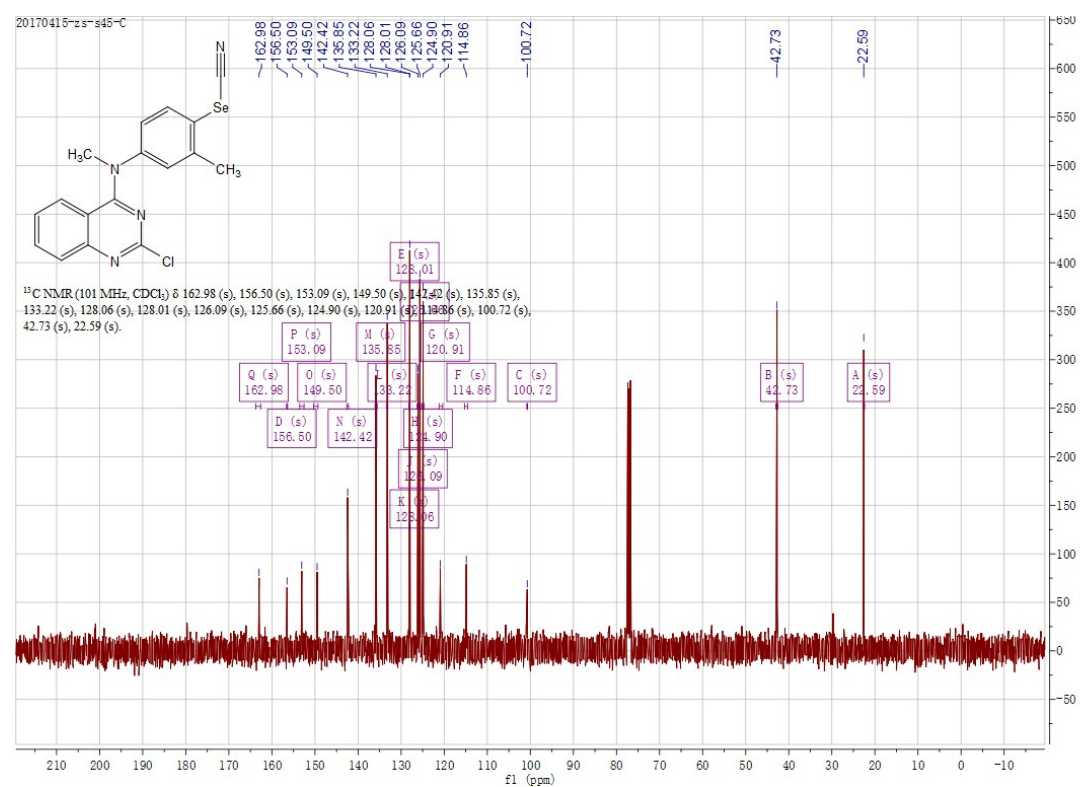

20170316-zs-s26-h

CN(C1=NC(=C2C=CC=CC=C2N=C1)C(=O)Cl)C3=CC=C(C=C3)C(=O)N#C

<sup>1</sup>H NMR (400 MHz, CDCl<sub>3</sub>) δ 7.83 (d, *J* = 8.2 Hz, 1H), 7.76 (d, *J* = 8.5 Hz, 1H), 7.68 (d, *J* = 7.4 Hz, 1H), 7.27 (s, 1H), 7.23–7.17 (m, 1H), 7.15 (d, *J* = 8.4 Hz, 1H), 7.08 (d, *J* = 8.4 Hz, 1H), 3.67 (s, 3H).

1.00  
1.00  
1.04  
1.06  
1.05  
1.02  
1.06  
2.97

7.83  
7.76  
7.68  
7.27  
7.23  
7.17  
7.15  
7.08  
3.67

F (m)  
7.20  
B (d)  
7.76  
A (d)  
7.83  
C (t)  
7.68  
E (d)  
7.15  
G (s)  
7.27  
H (s)  
3.67

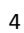



1H NMR spectrum of compound 10b in DMSO-d<sub>6</sub>. The x-axis represents the chemical shift in ppm, ranging from 16 to -3. The y-axis represents the intensity in arbitrary units, ranging from 0 to 7500. The spectrum shows several peaks, with integration values provided for some of them.

Chemical shift (ppm) labels (from left to right): 7.78, 7.76, 7.65, 7.62, 7.61, 7.59, 7.54, 7.52, 7.20, 7.17, 7.05, 7.03, 7.06, 6.74, 3.64, 2.22 H<sub>2</sub>O.

Integration values (from left to right): 0.97, 0.94, 1.00, 0.98, 0.98, 1.01, 0.99, 3.03, 3.04.

Peak assignments (from left to right):

- G (s) 7.65
- E (d) 7.53
- B (t) 7.05
- D (d) 7.77
- A (d) 6.76
- C (d) 7.19
- F (t) 7.61
- H (s) 3.54
- I (s) 2.22

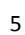

6a

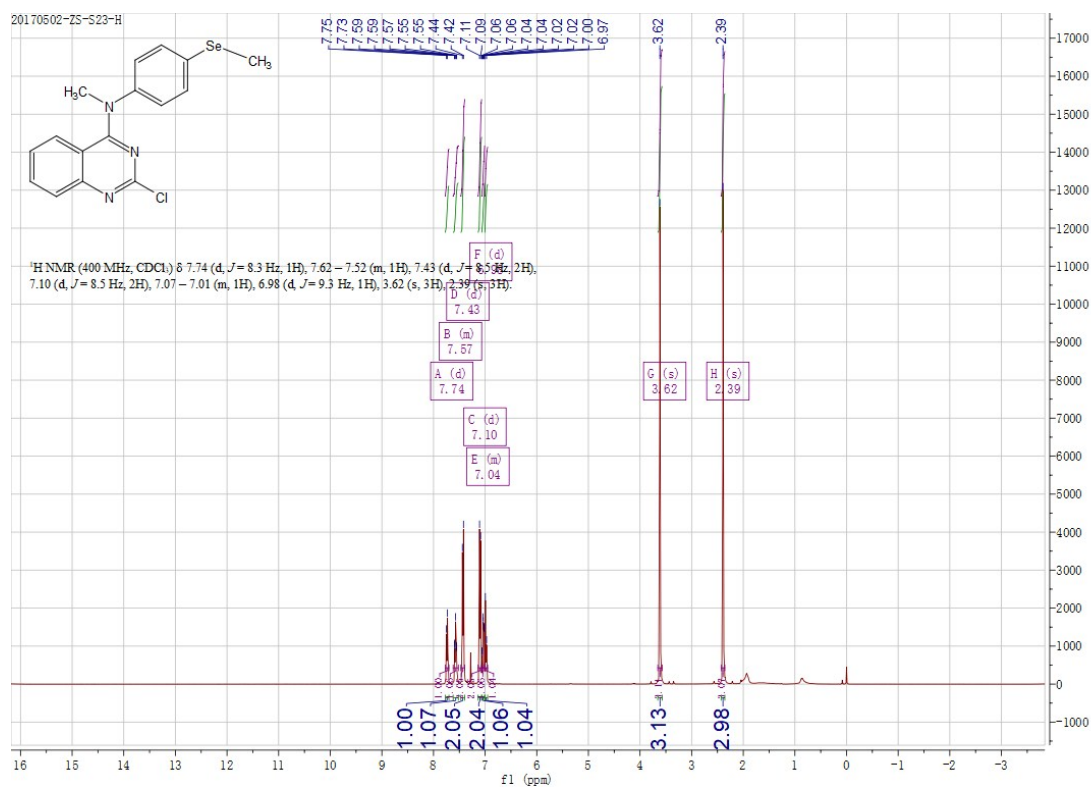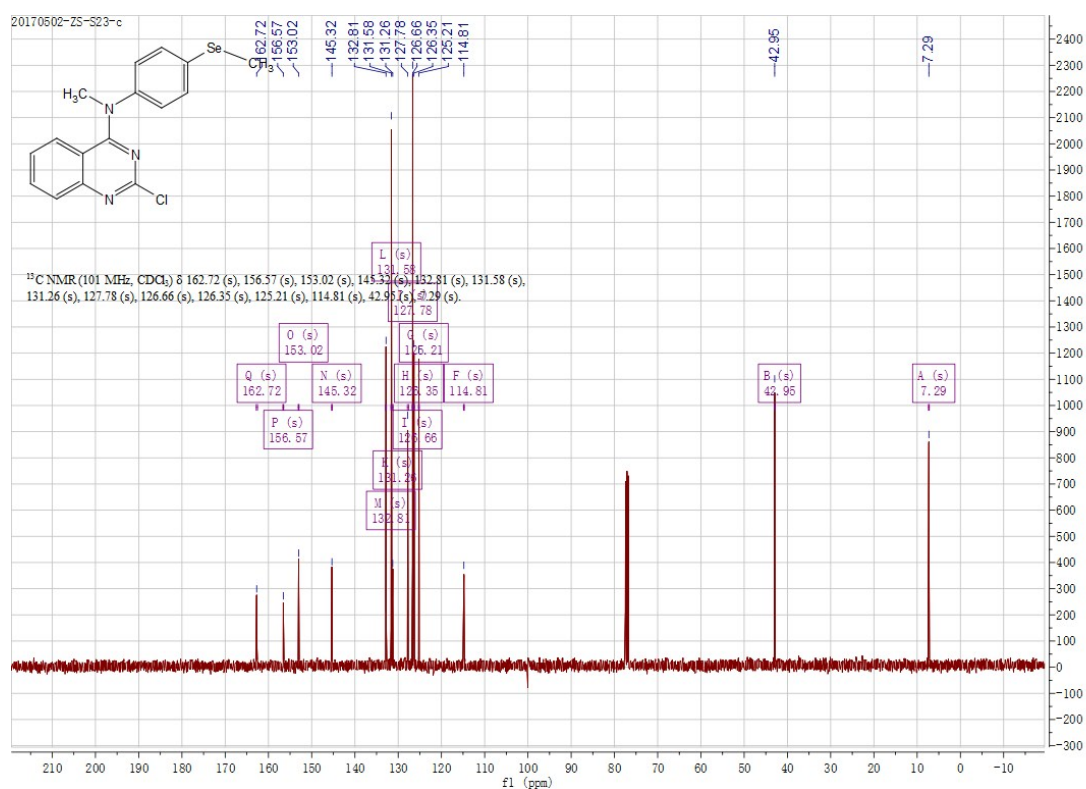

6b

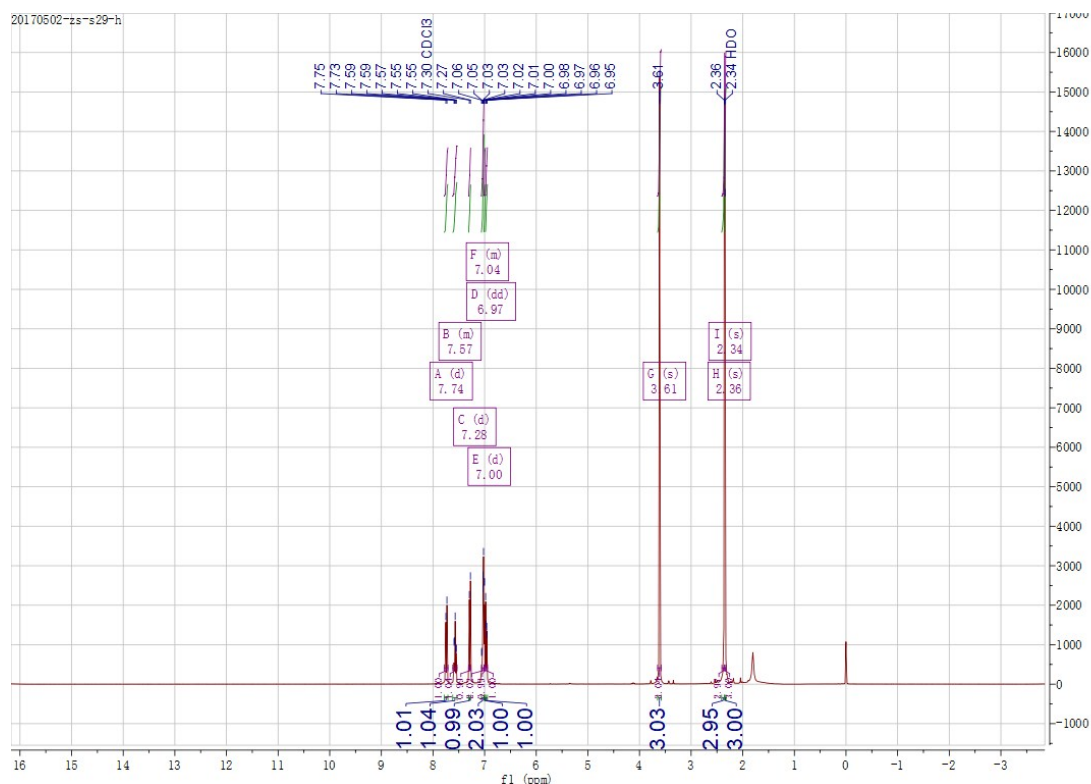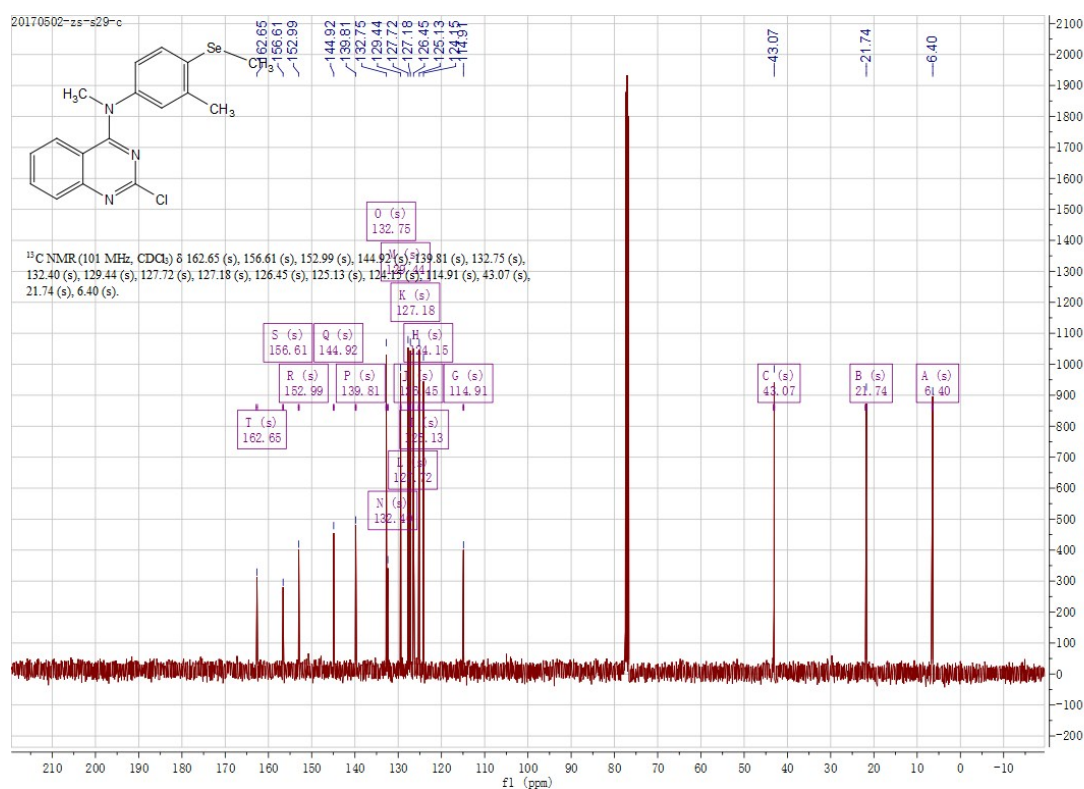

6c

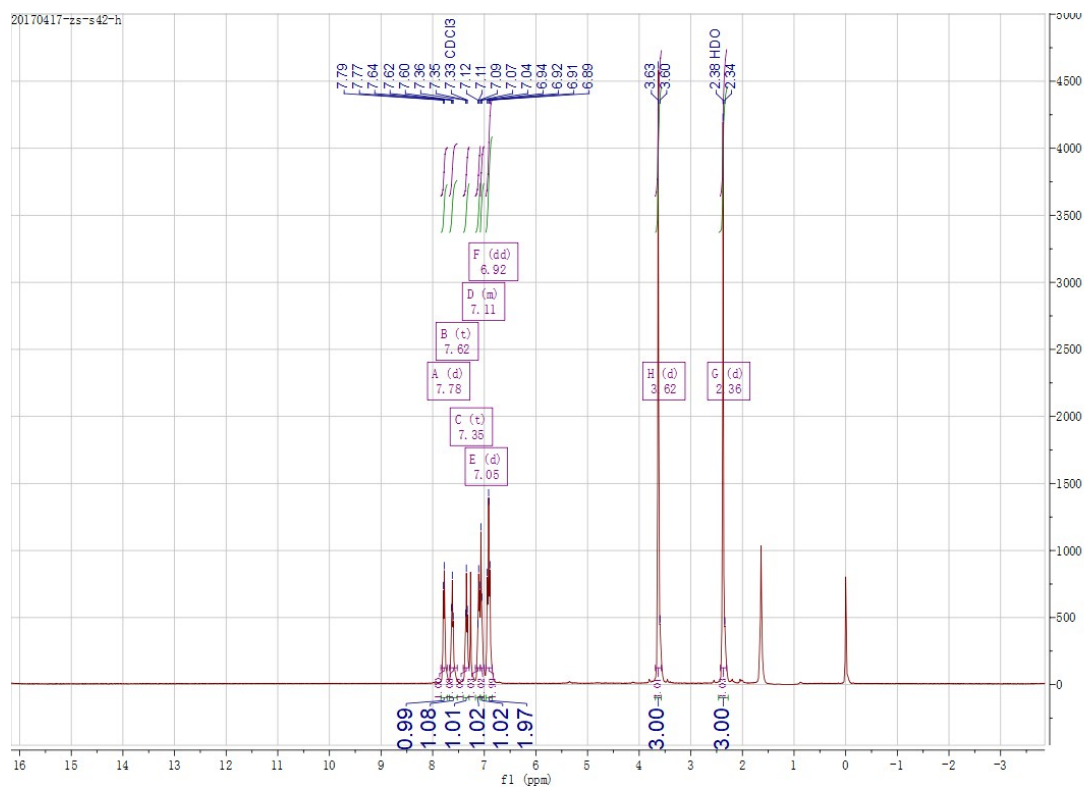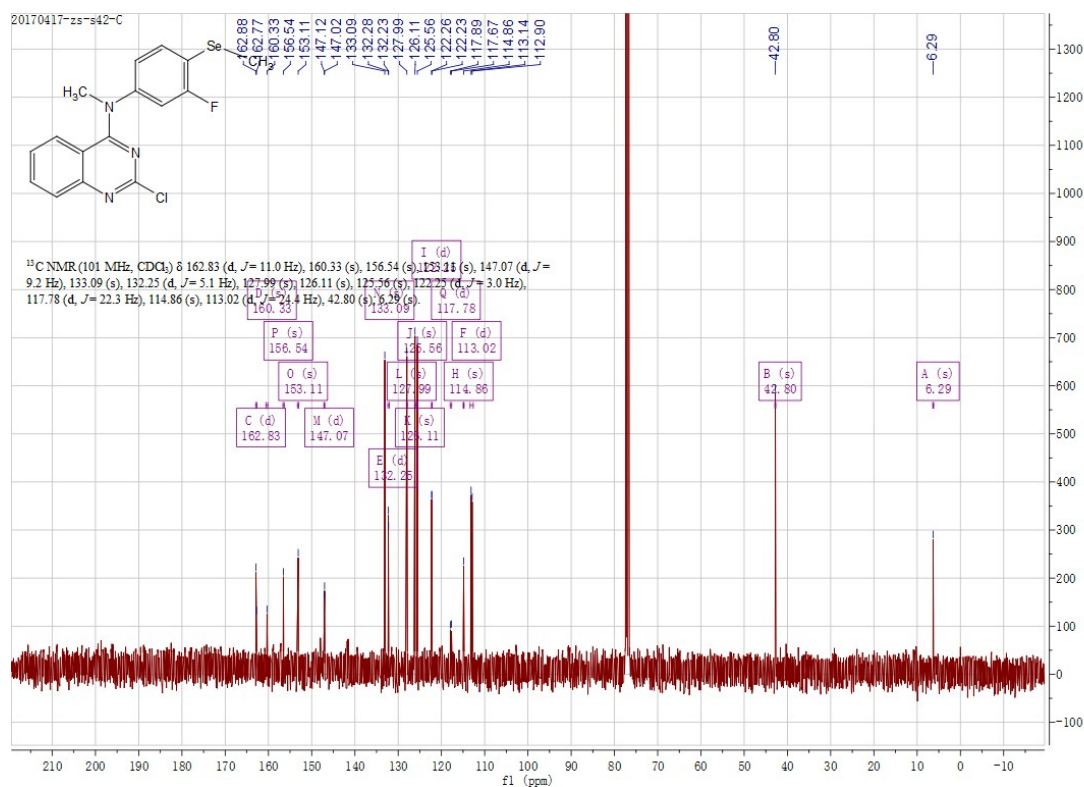

6d

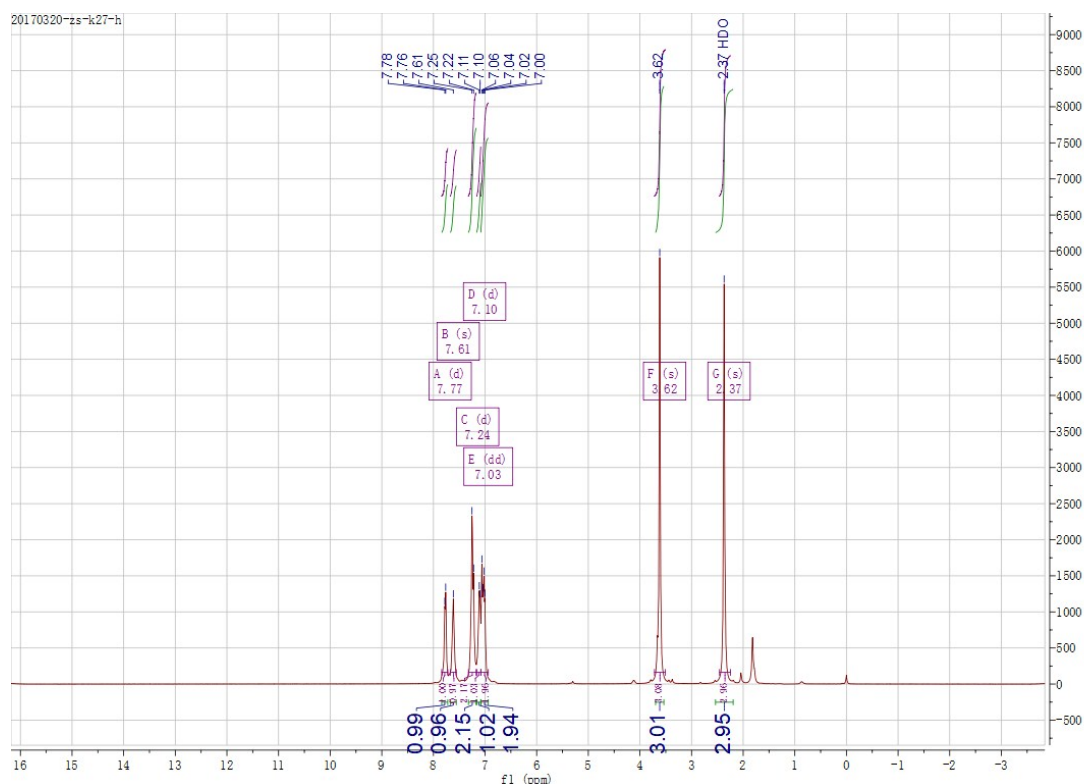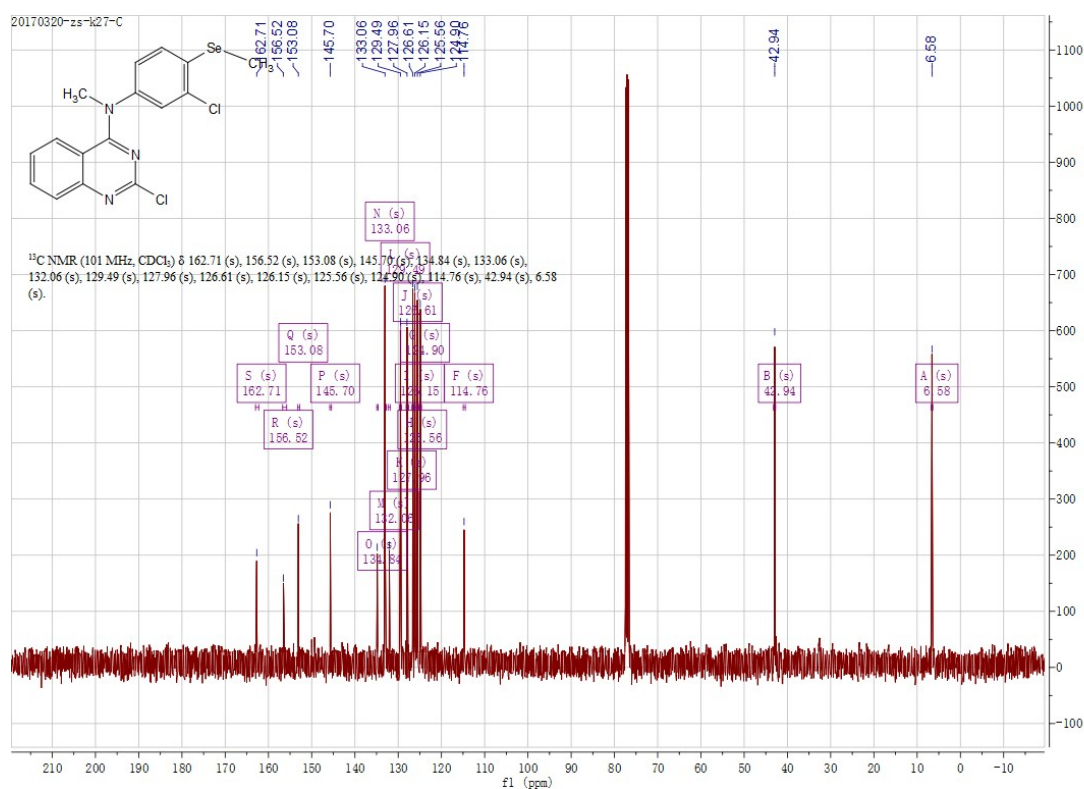



<sup>1</sup>H NMR spectrum (CDCl<sub>3</sub>) of compound 10b. The x-axis represents the chemical shift in ppm, ranging from 16 to -3. The y-axis represents the intensity. The spectrum shows several peaks in the aromatic region (6.5-7.8 ppm) and two aliphatic singlets (2.36 and 3.61 ppm). Integration values are provided below the peaks.

| Peak Label | Chemical Shift (ppm) | Integration |
|------------|----------------------|-------------|
| F (m)      | 7.05                 | 0.96        |
| D (d)      | 7.19                 | 1.00        |
| B (m)      | 7.42                 | 0.96        |
| A (m)      | 7.61                 | 0.98        |
| C (dd)     | 7.77                 | 1.00        |
| E (dd)     | 7.11                 | 1.96        |
| G (dd)     | 3.61                 | 3.01        |
| H (s)      | 2.36                 | 2.92        |

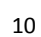

170417-zs-s36-h

Chemical shift (ppm): 7.67, 7.65, 7.51, 7.49, 7.30, 7.22, 7.20, 6.97, 6.95, 6.93, 6.91, 6.74, 6.71, 3.45, 2.33, 2.07.

Integration values: 1.00, 1.08, 1.00, 1.05, 1.04, 1.07, 1.00, 2.99, 3.02, 3.02.

Peak assignments and integrations:

- A (d) 7.66
- B (t) 7.49
- C (d) 6.96
- D (d) 6.92
- E (d) 6.72
- F (s) 7.30
- G (d) 7.21
- H (s) 3.45
- I (s) 2.33
- J (s) 2.07

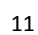



6g

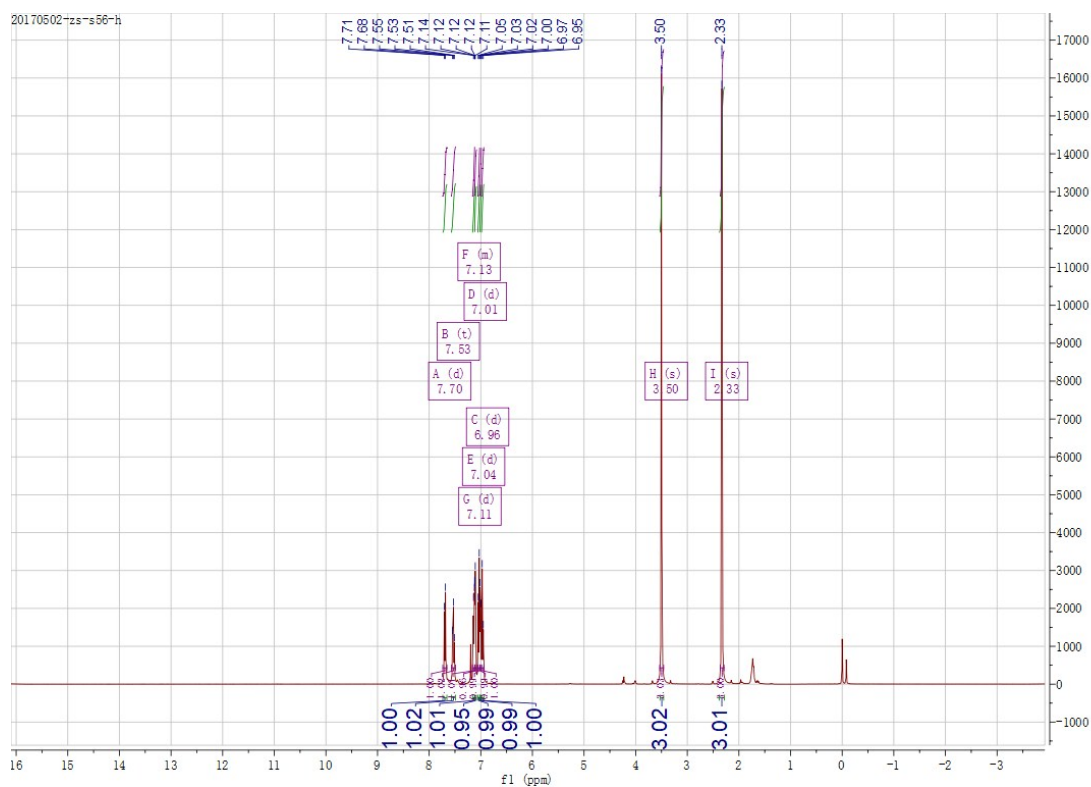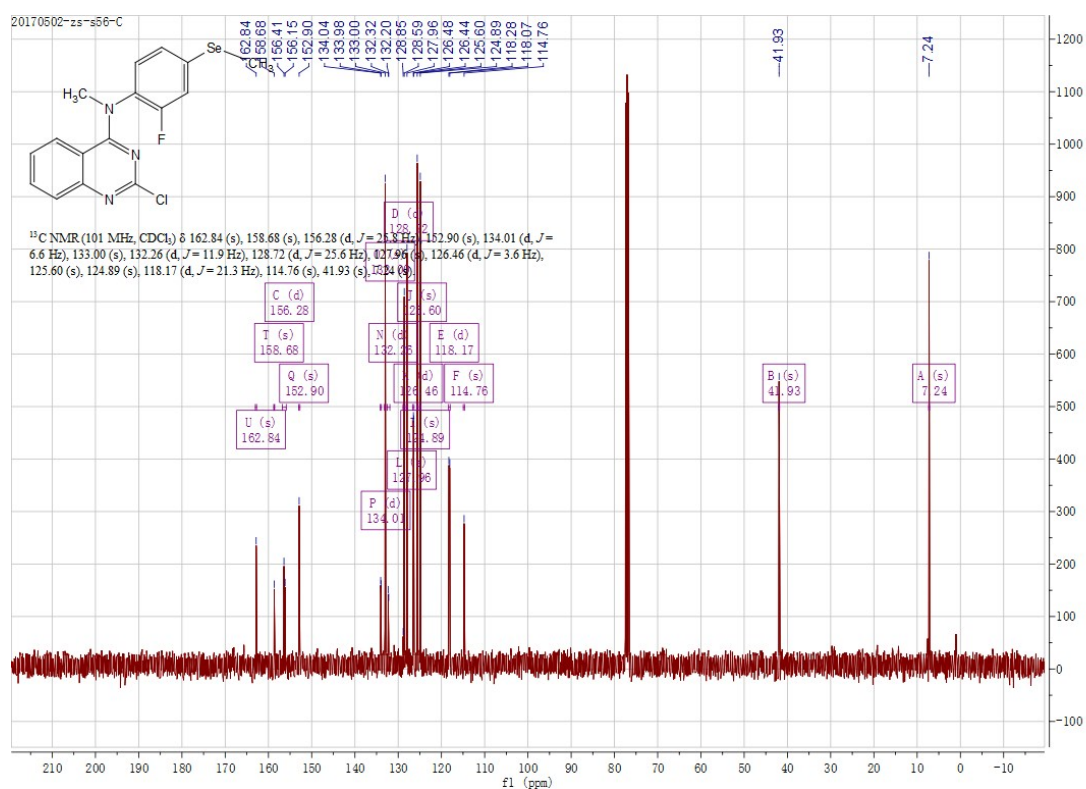

6h

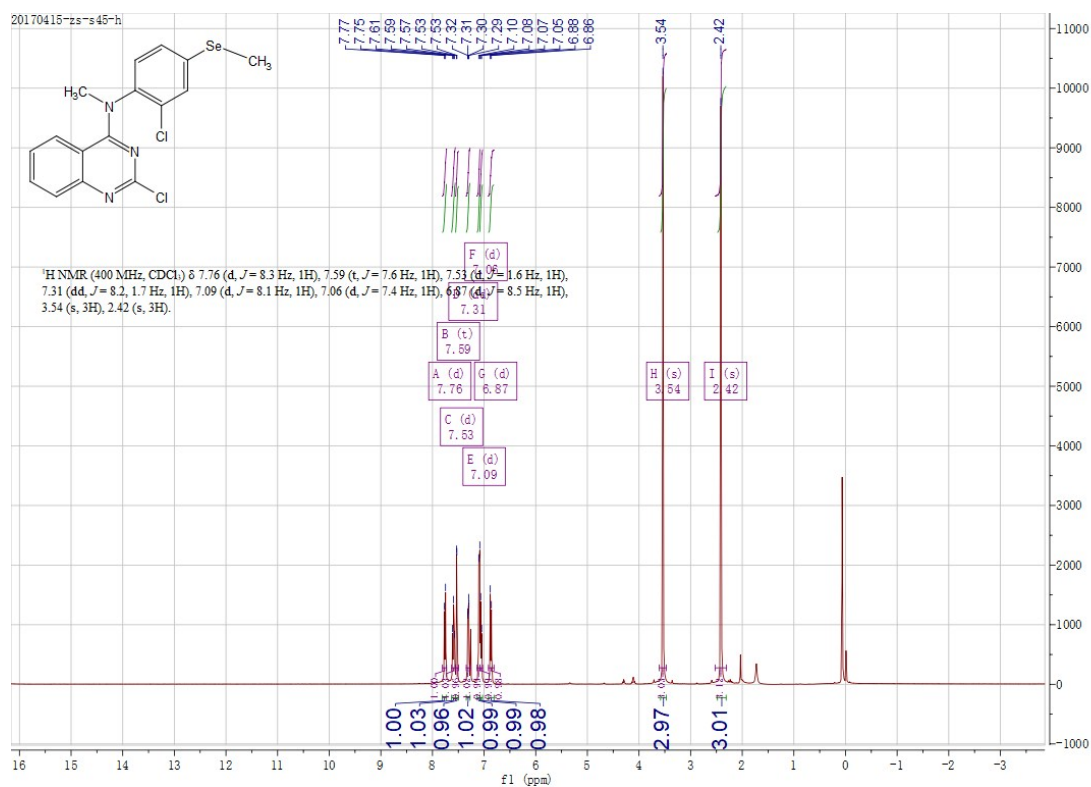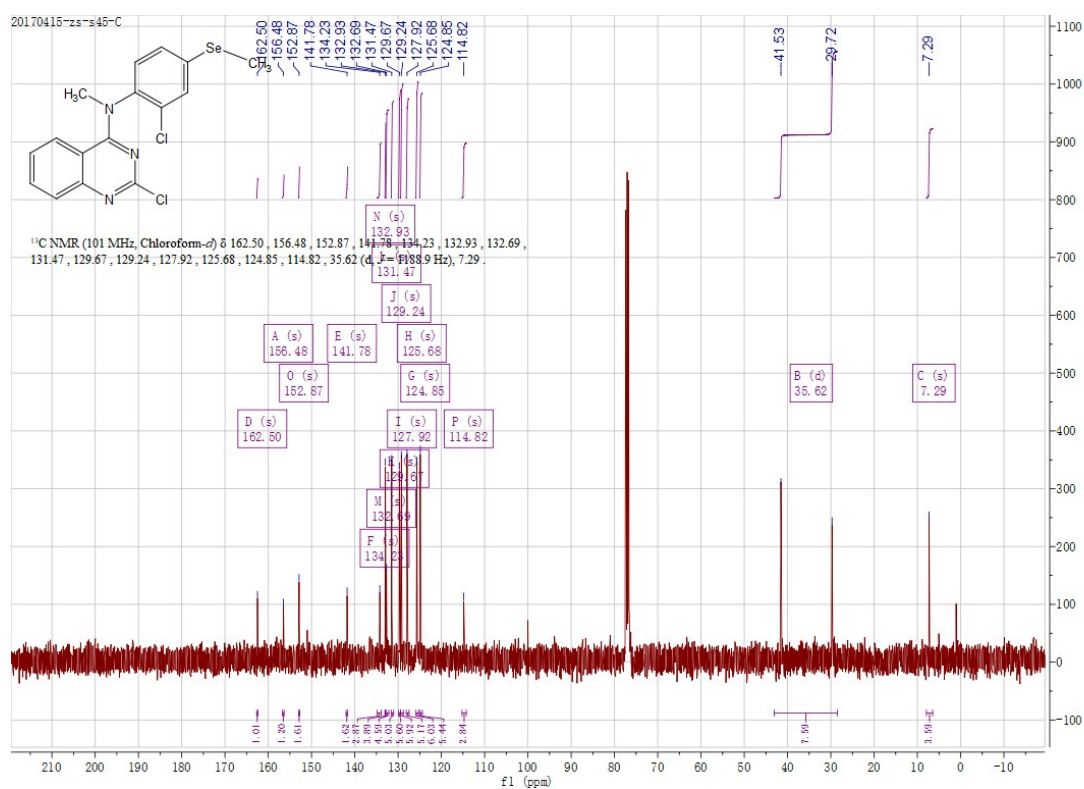

6i

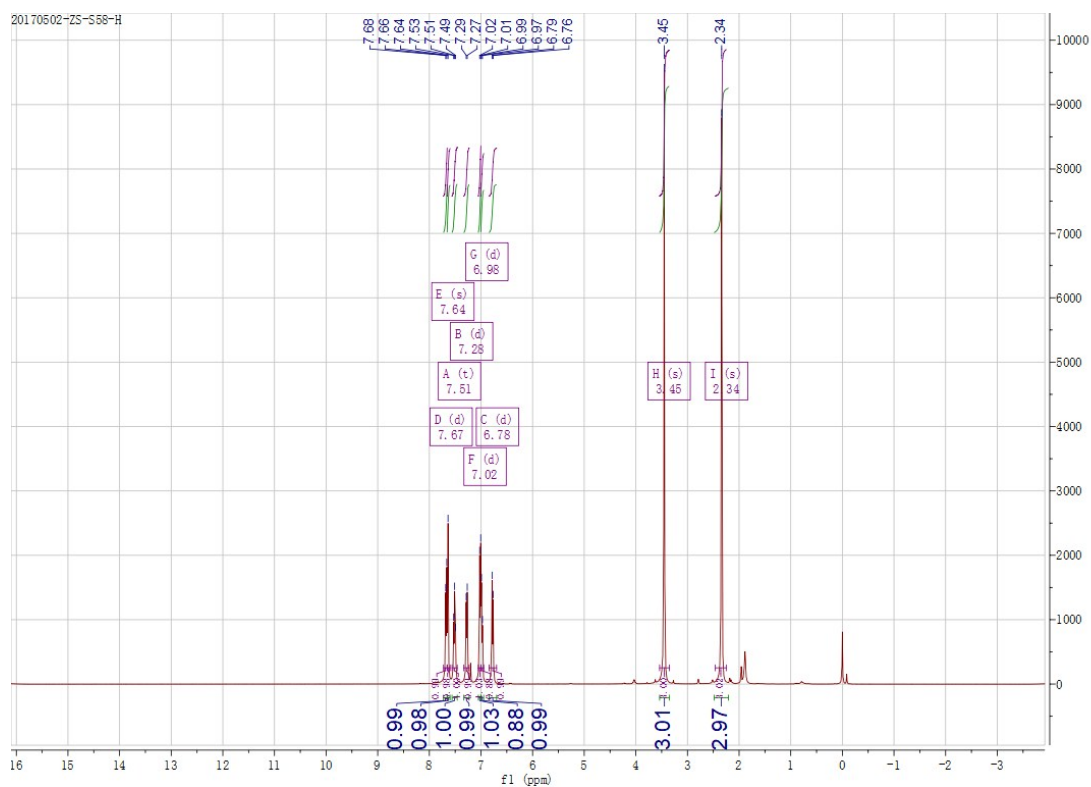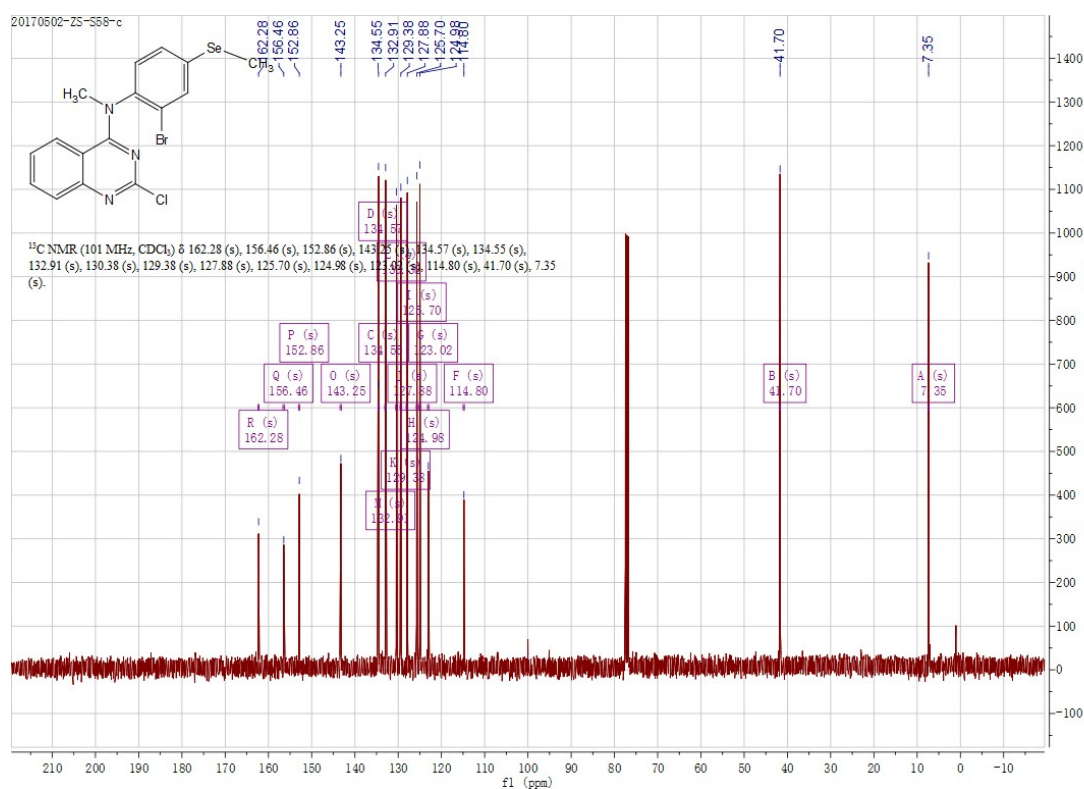

7a

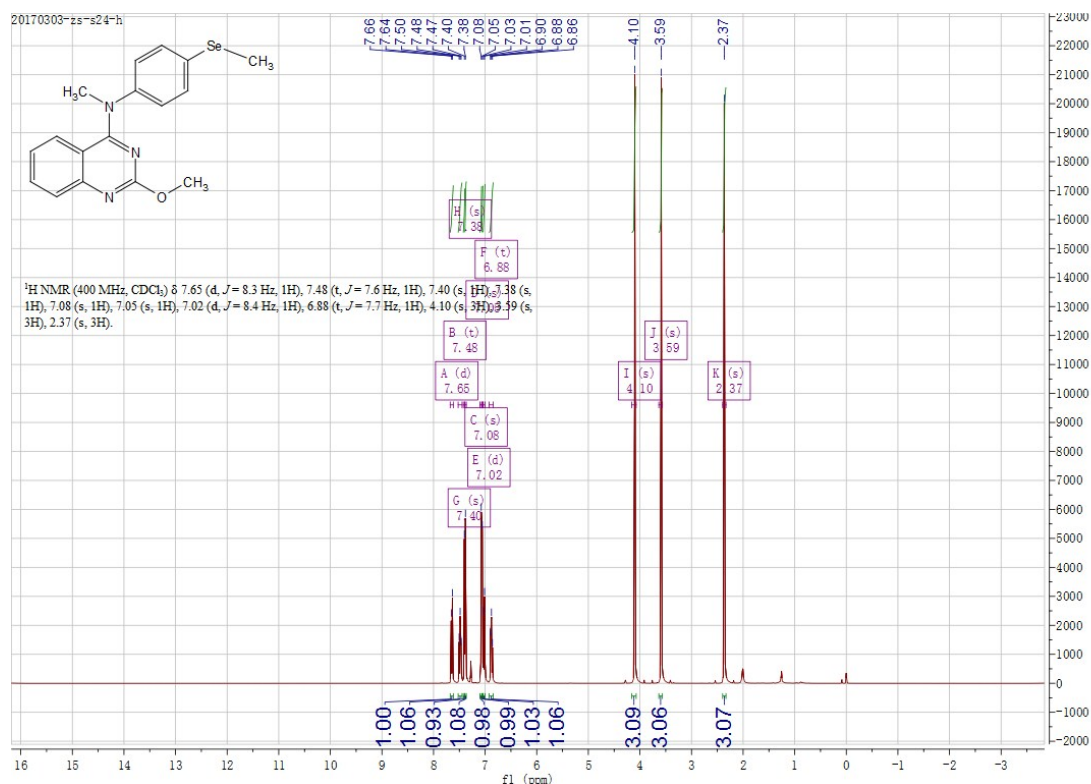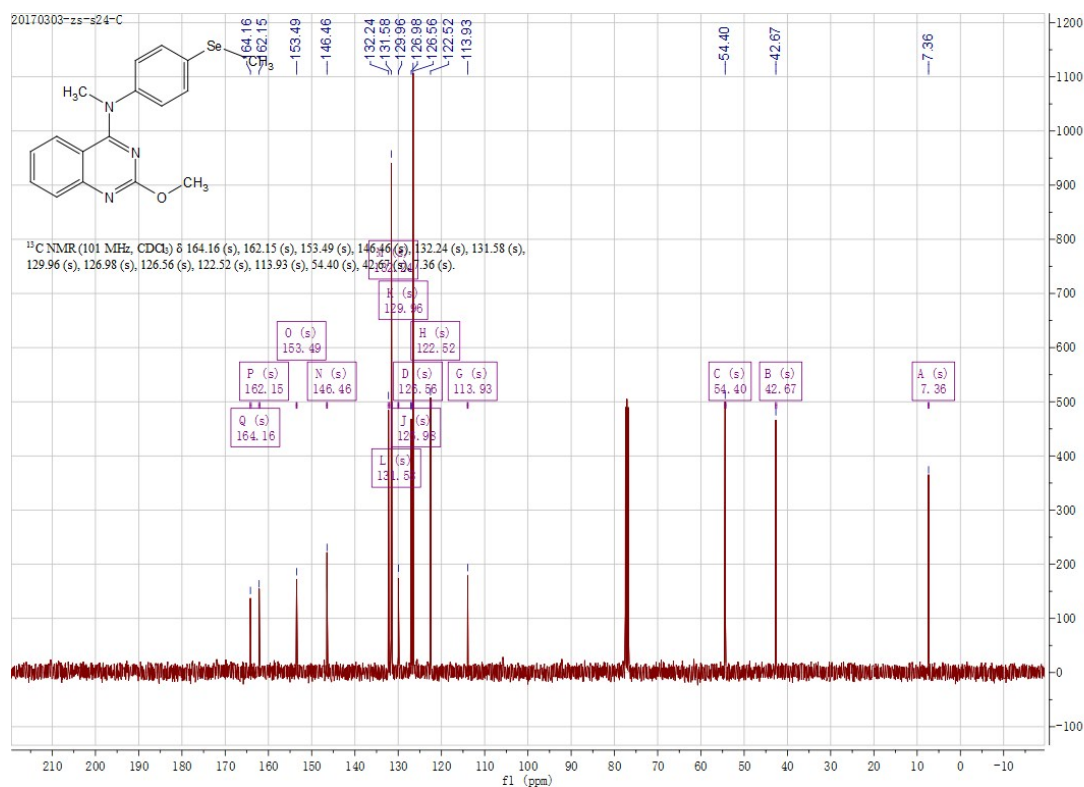

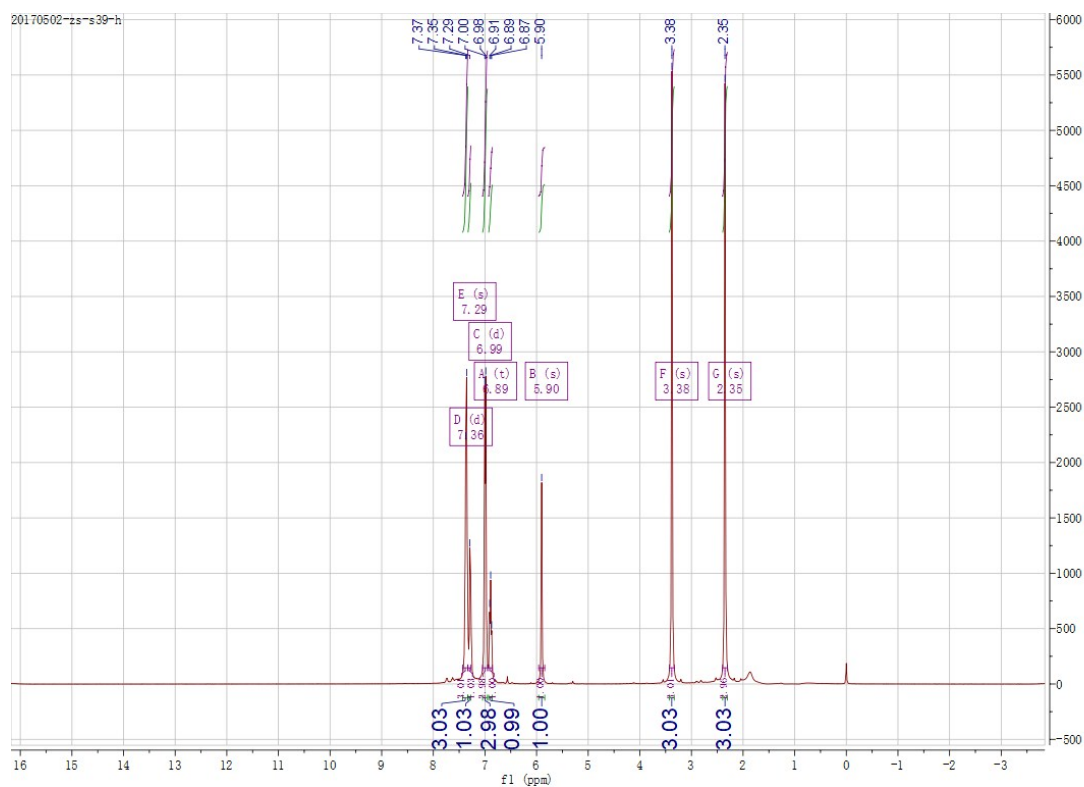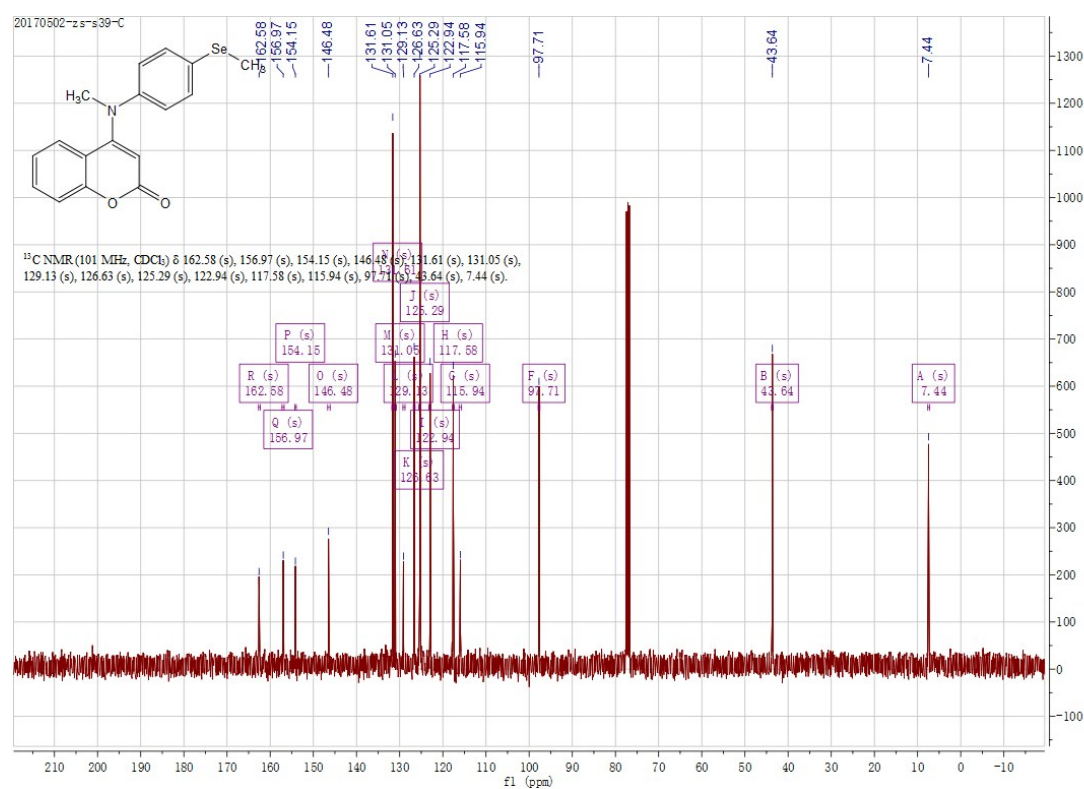

## SI2. NMR spectra of intermediate compounds

### 2a

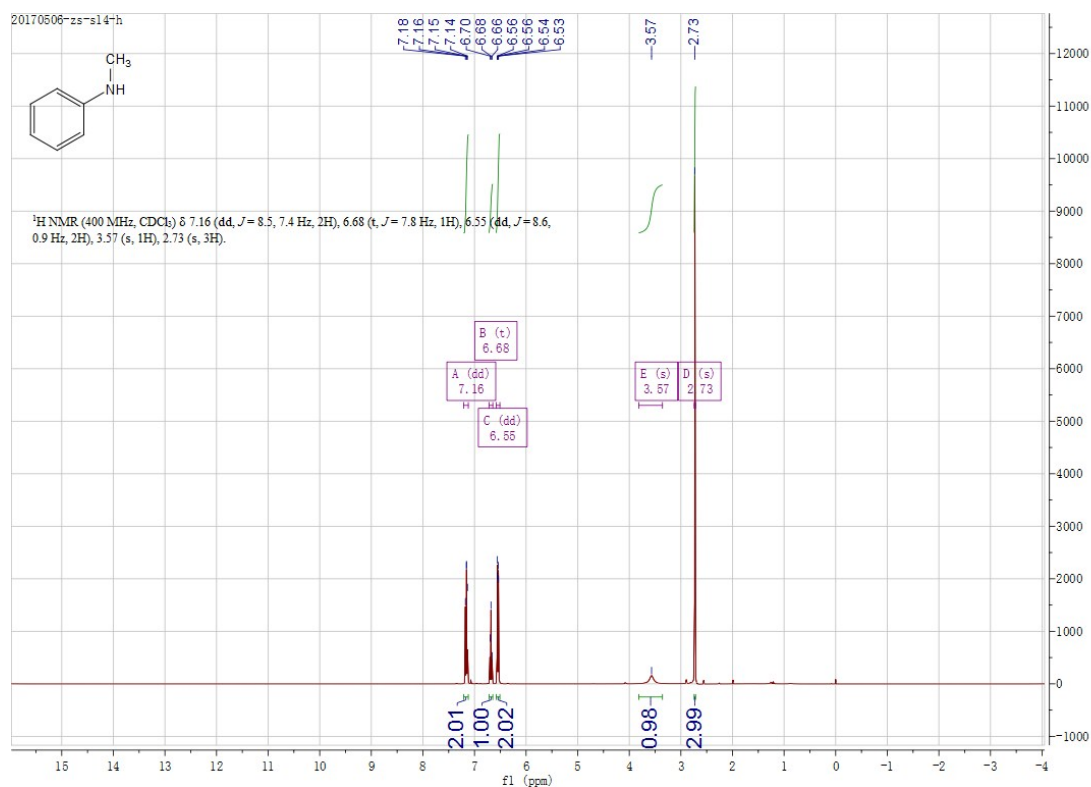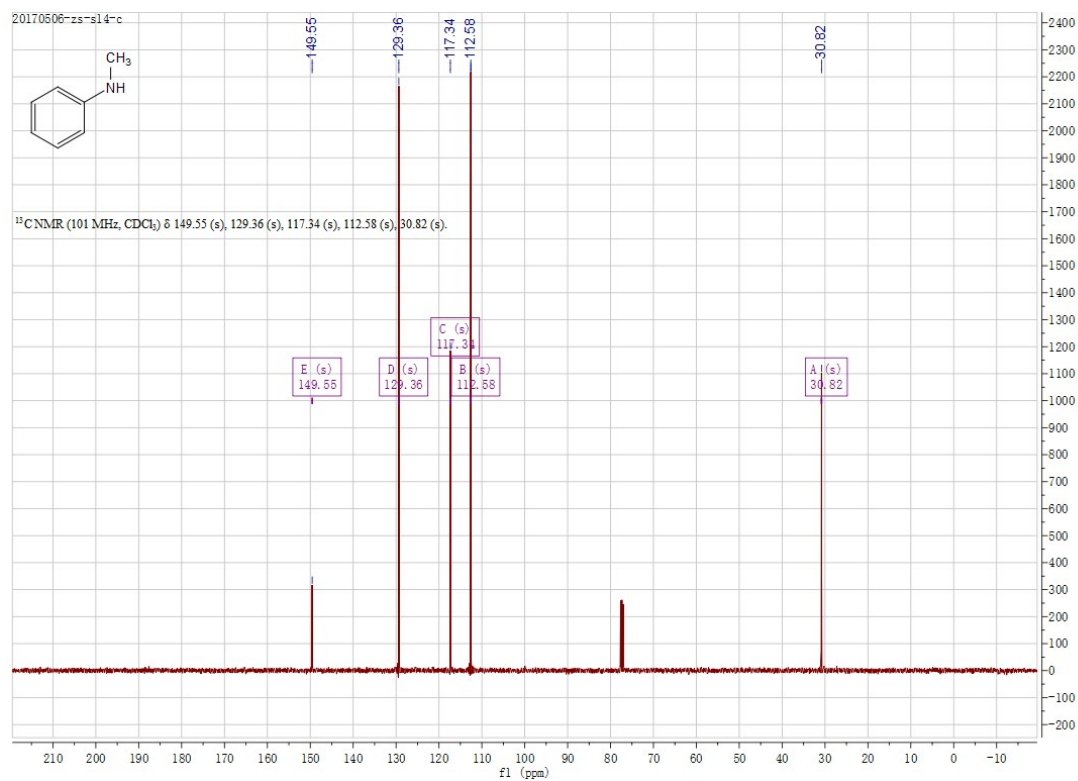



2b

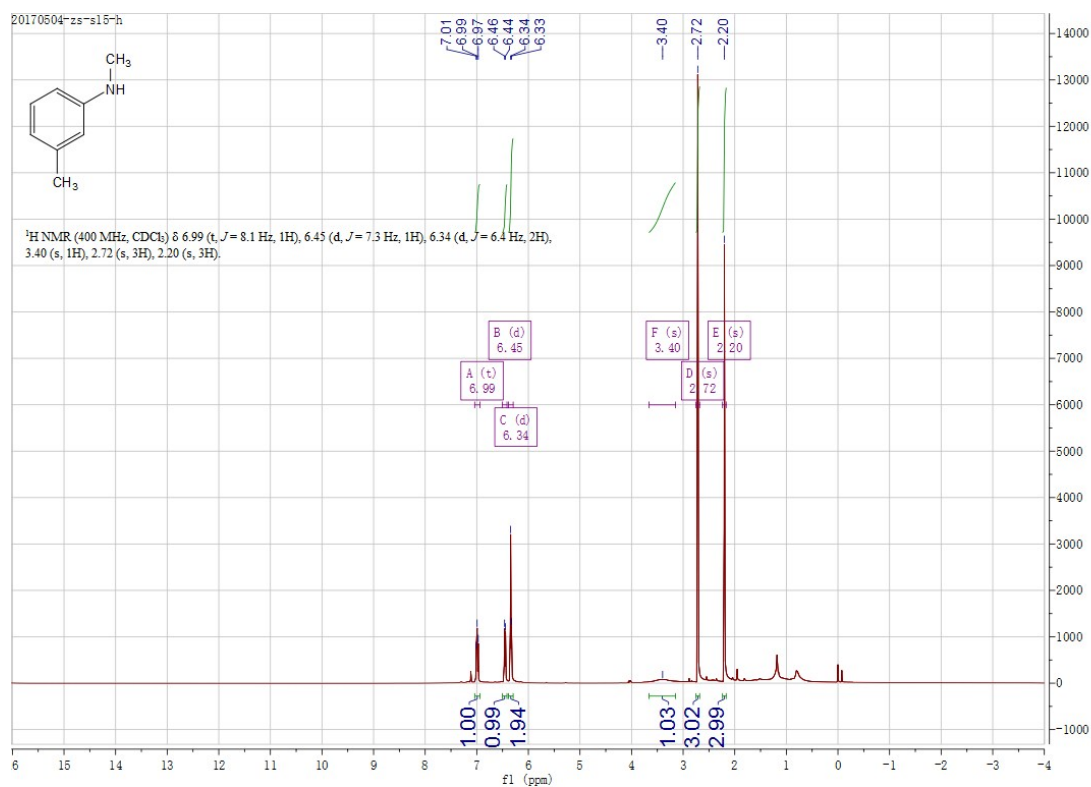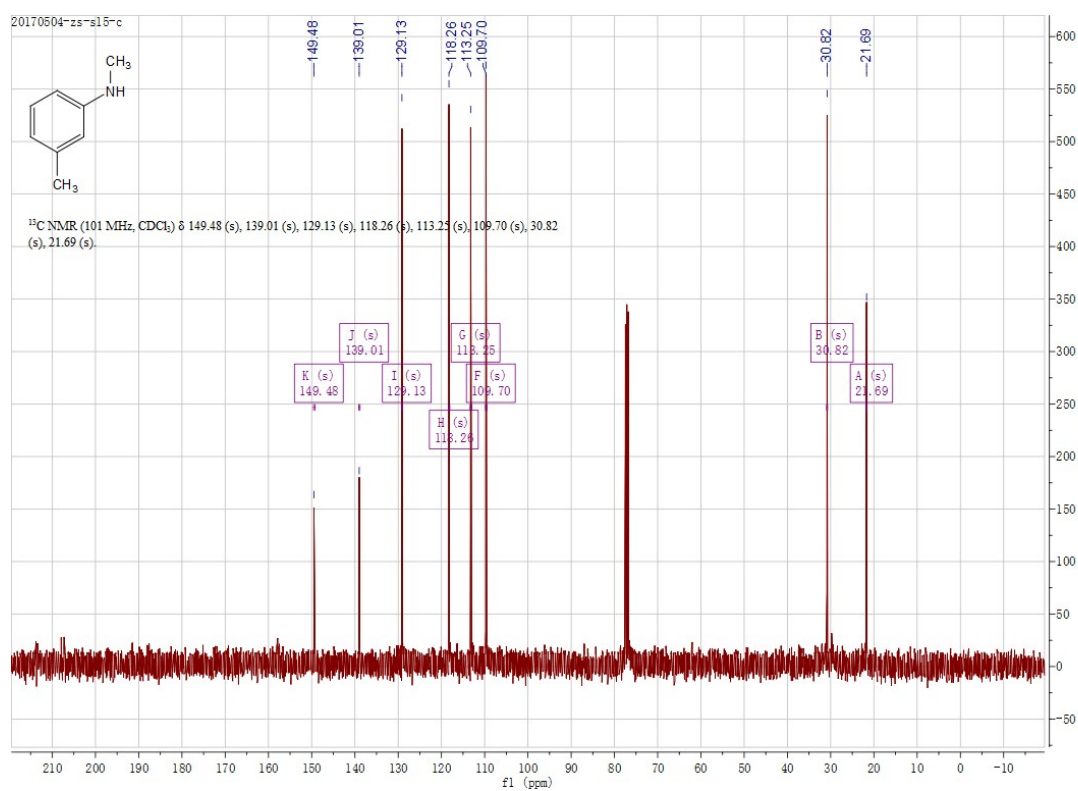



2c

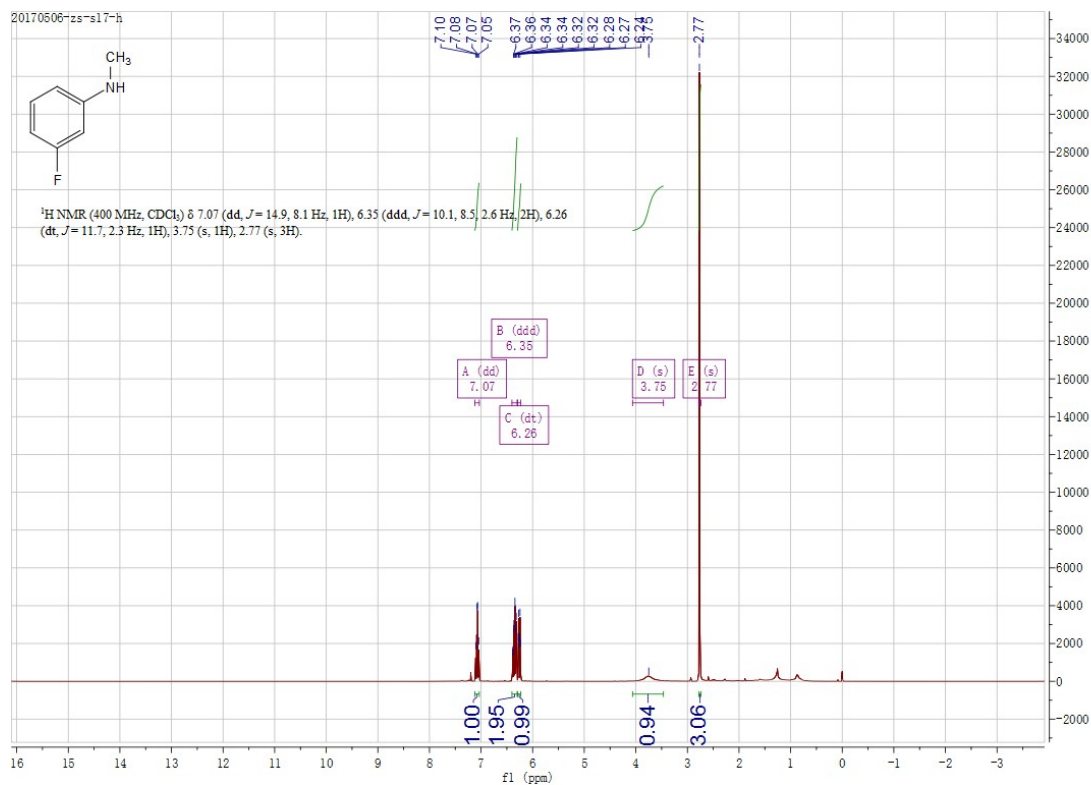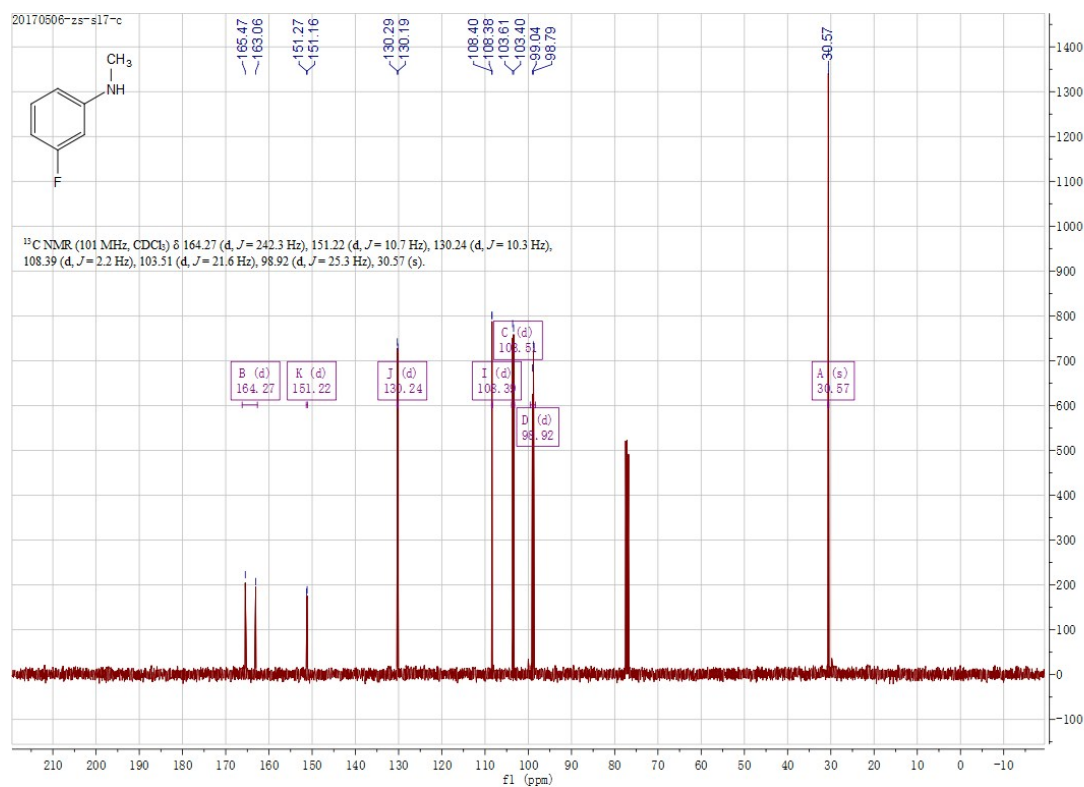

2d

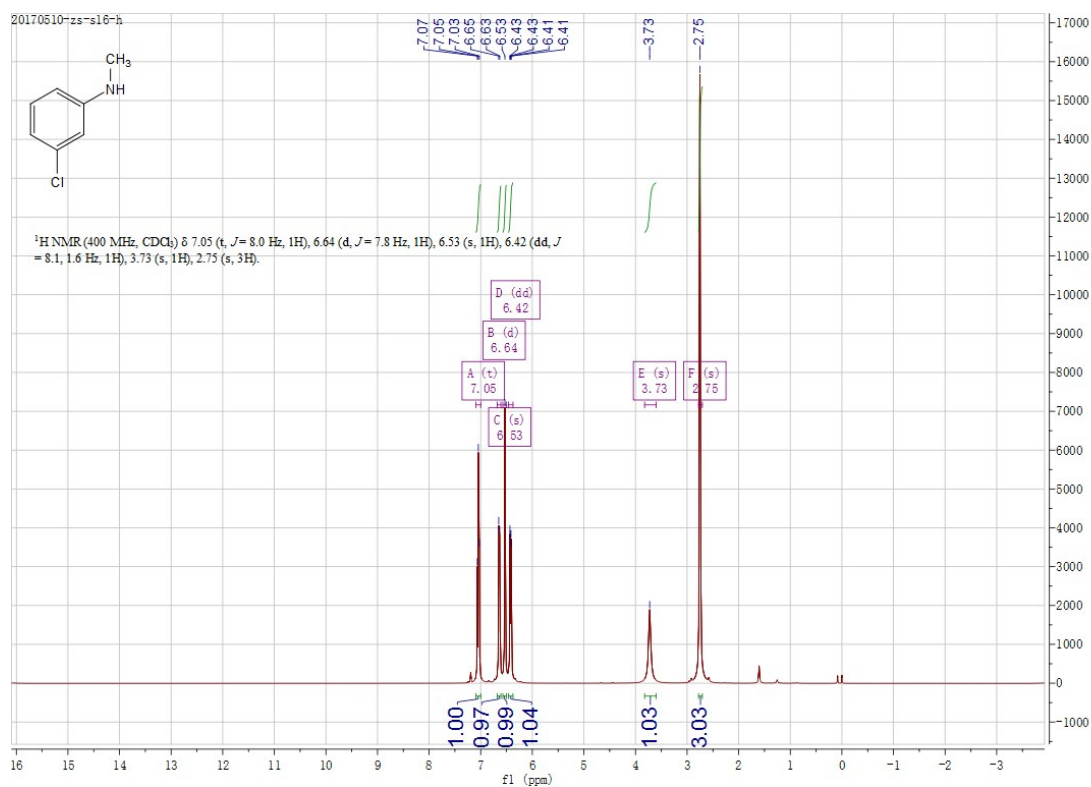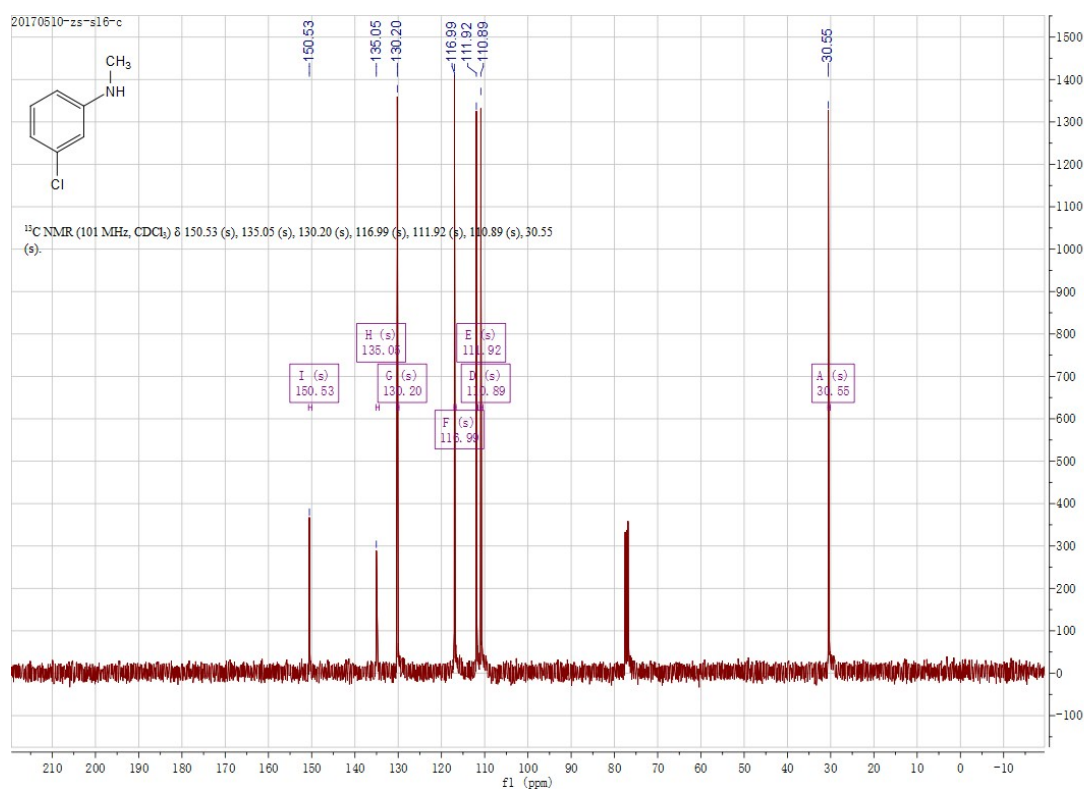

2e

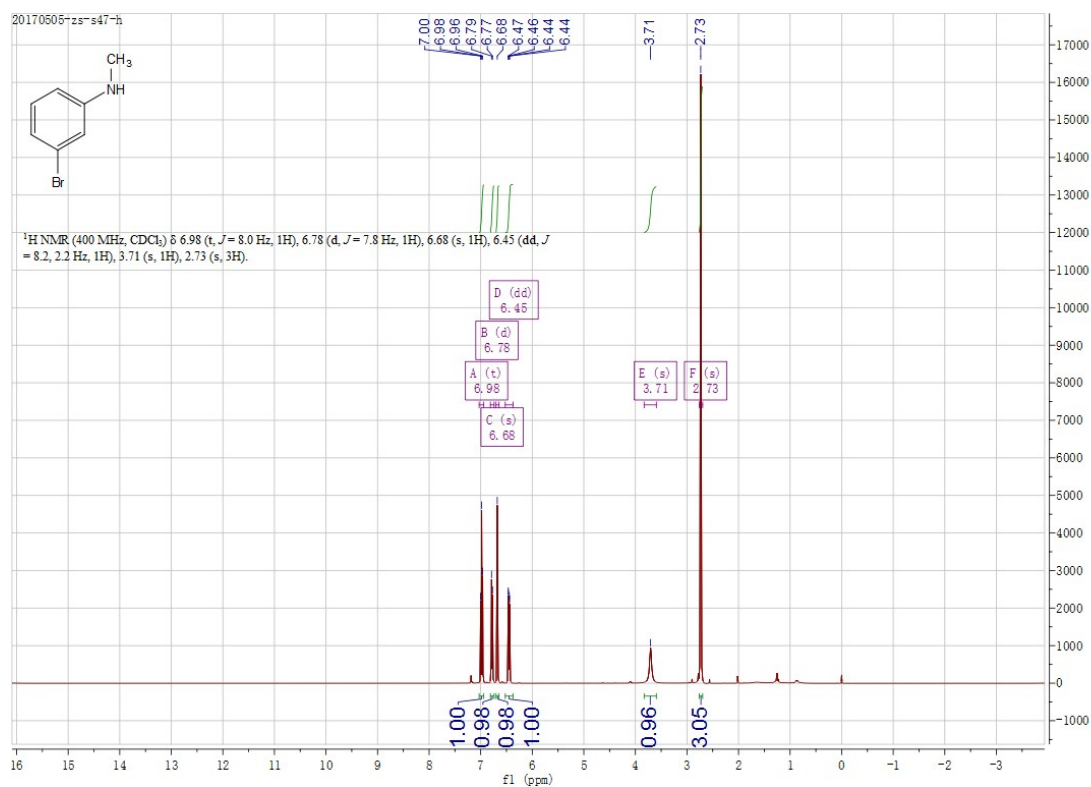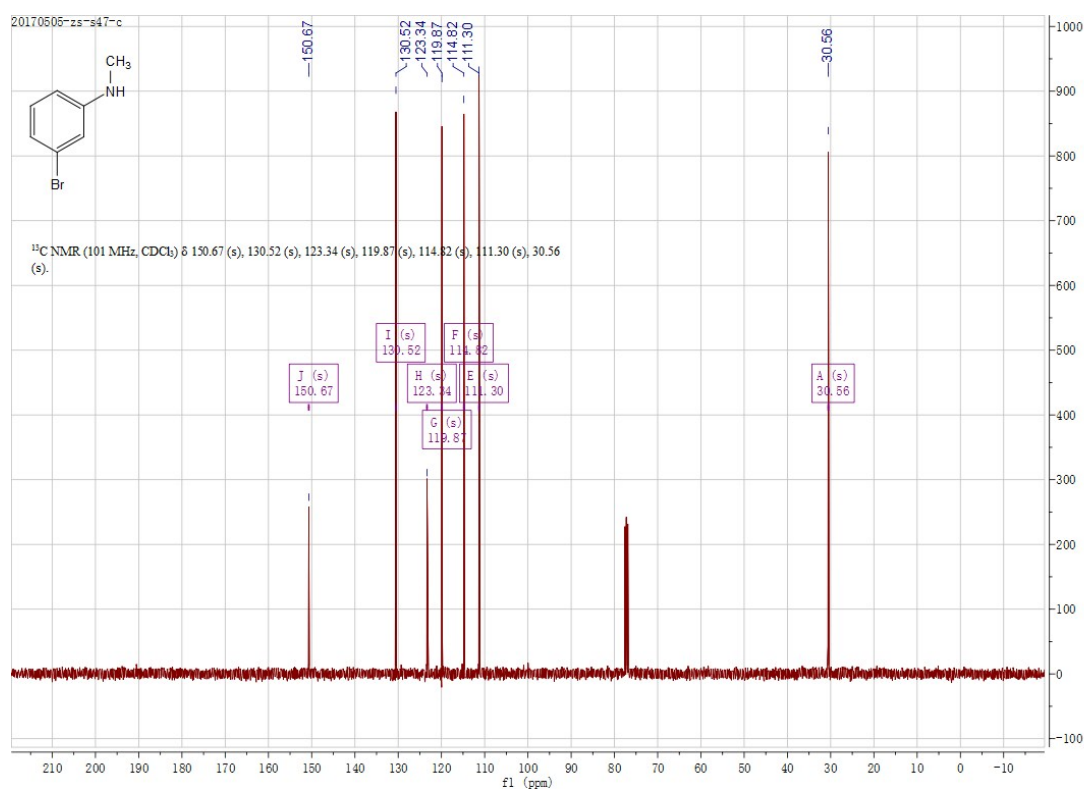

2f

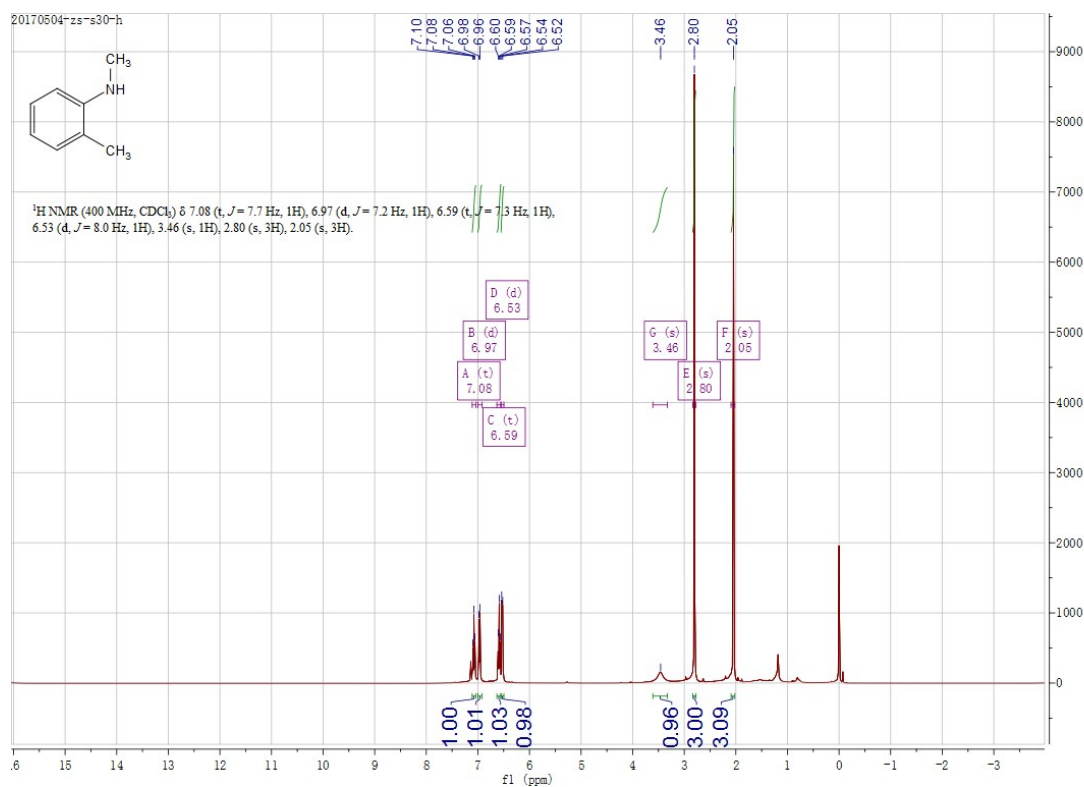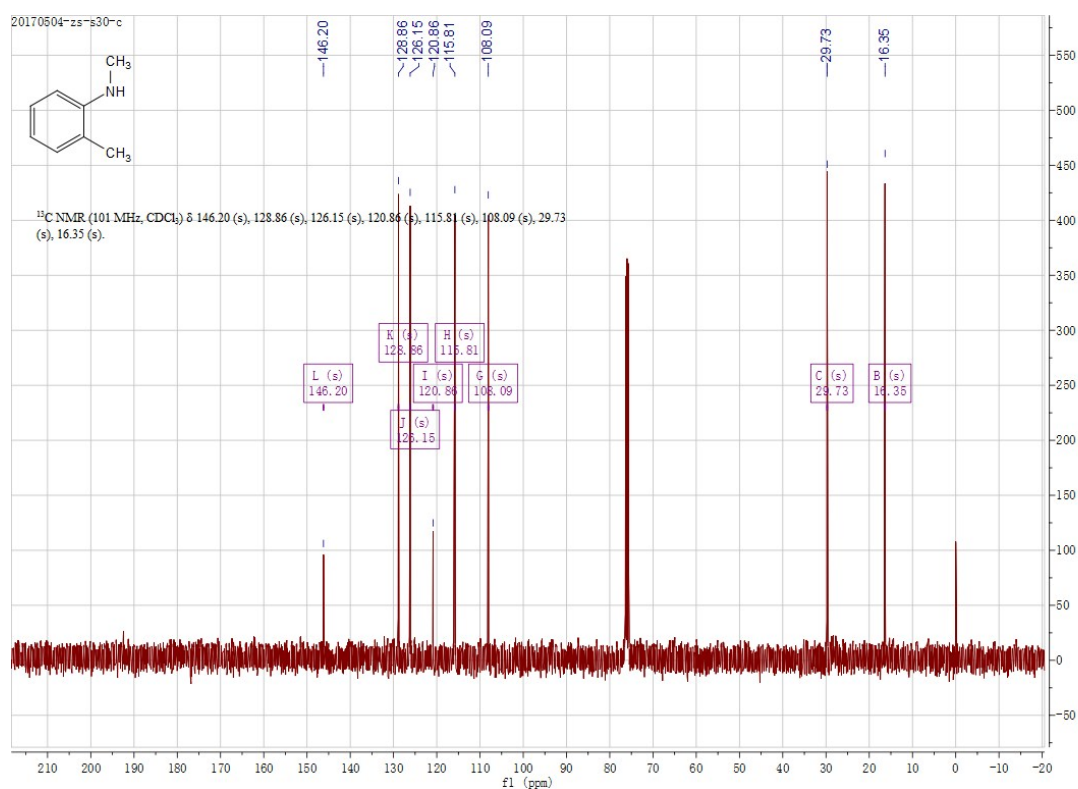

2g

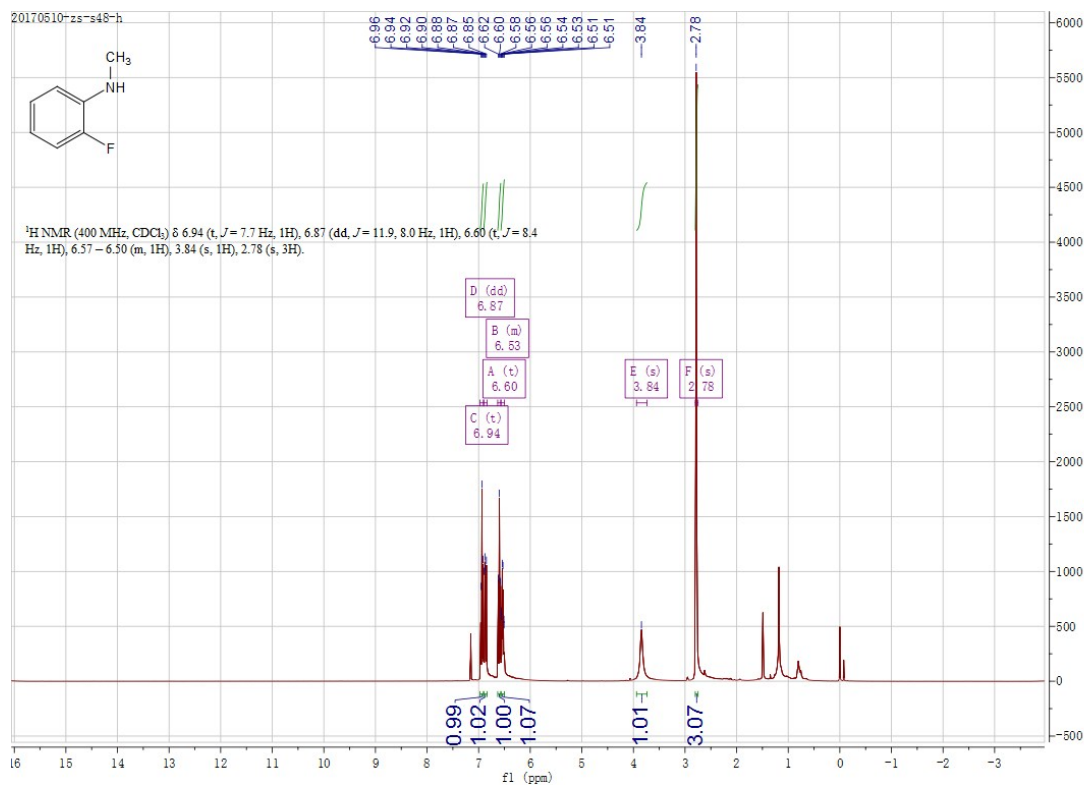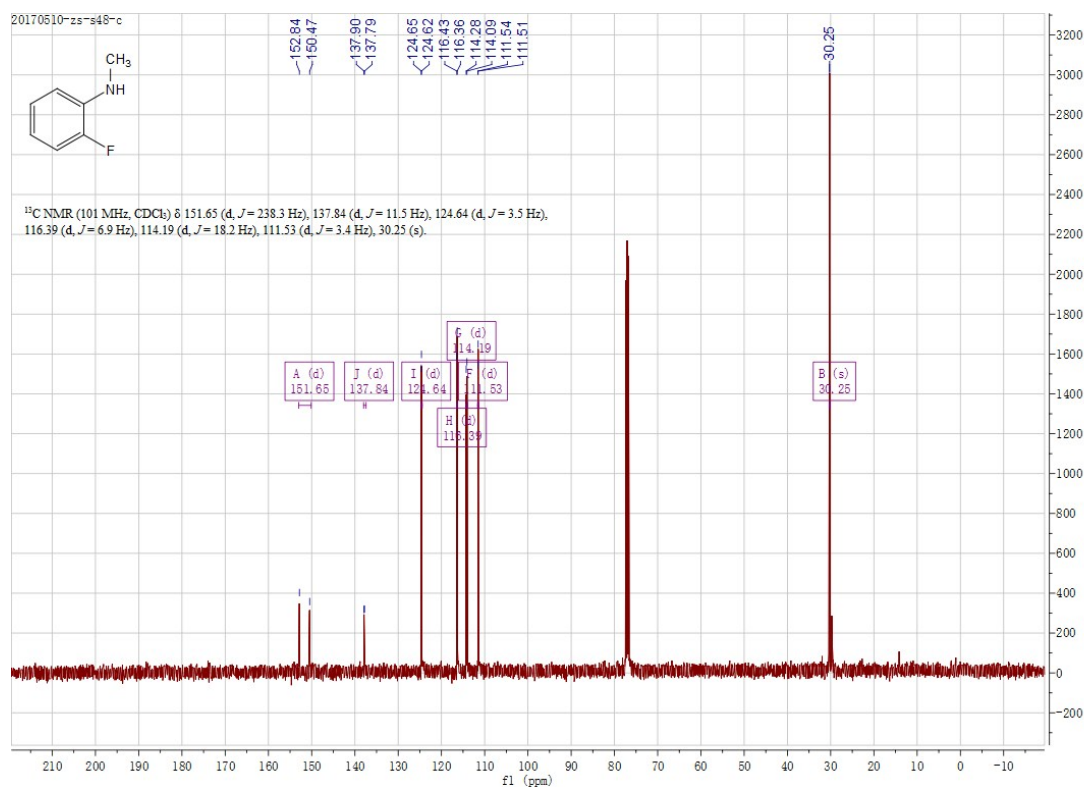

2h

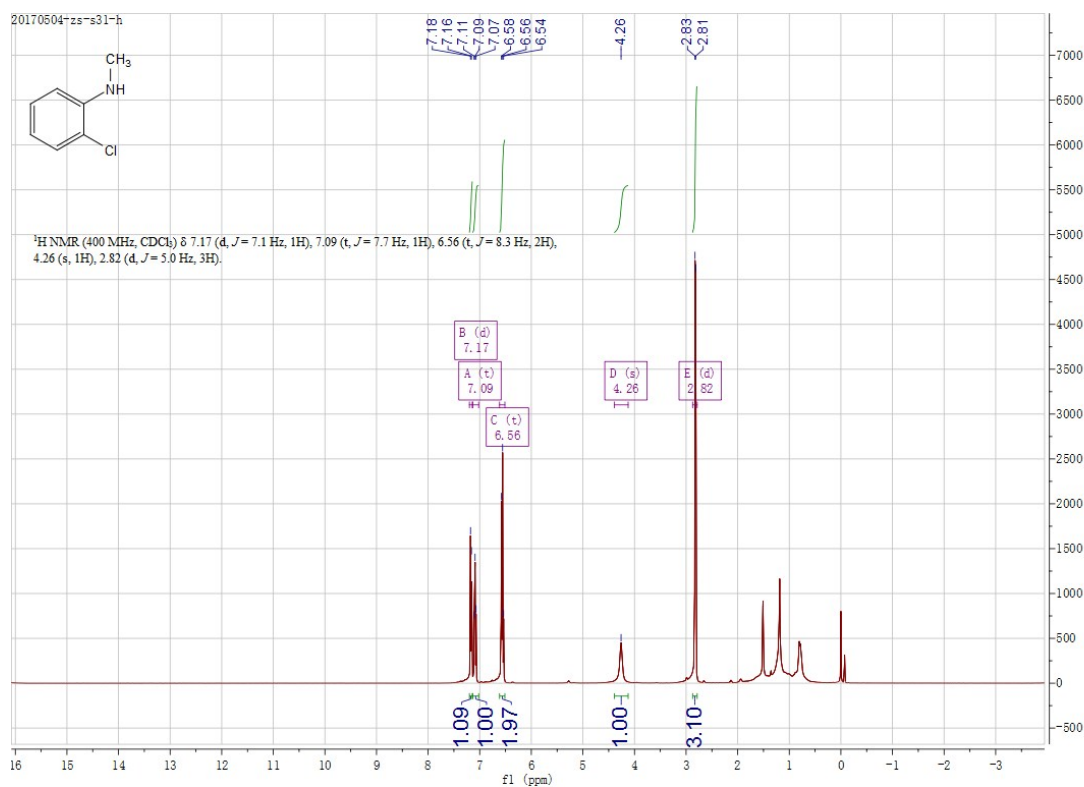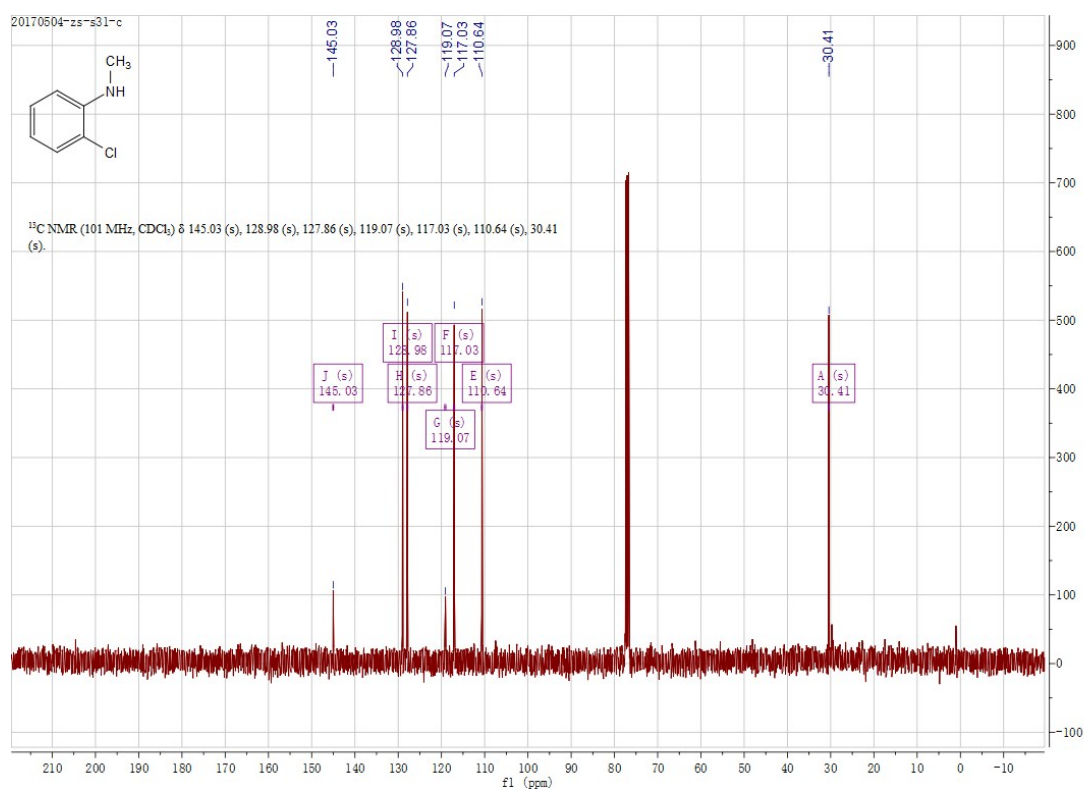

2i

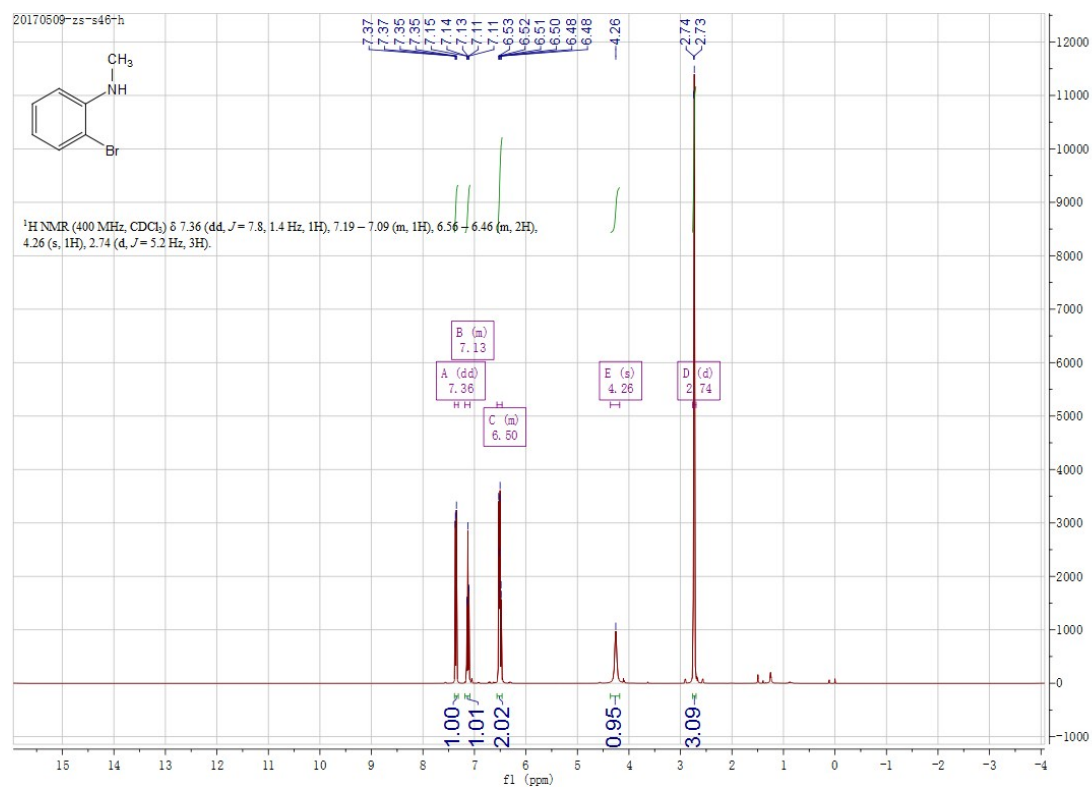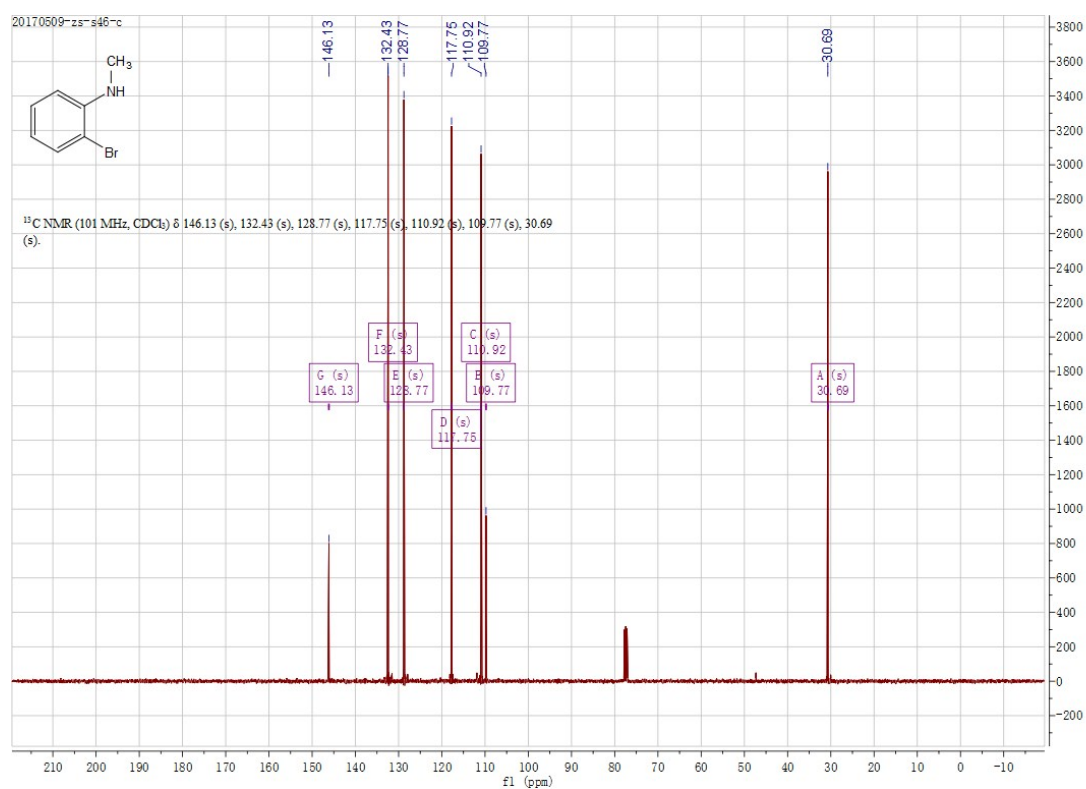



**3a**

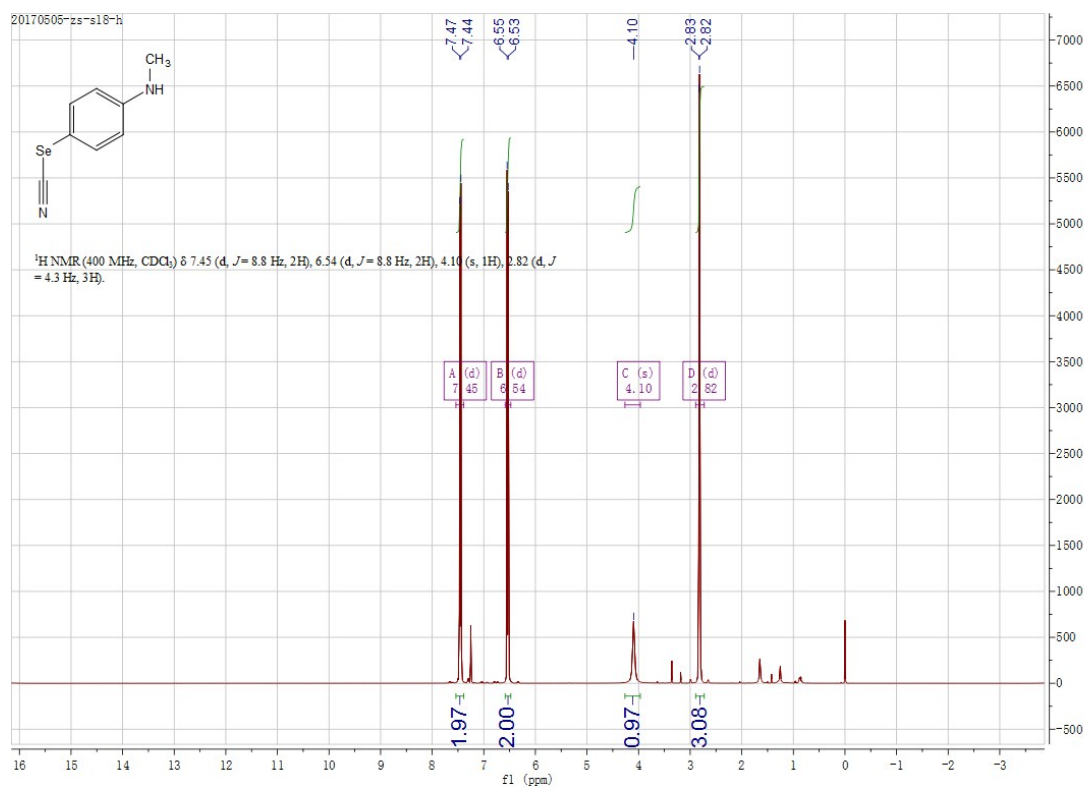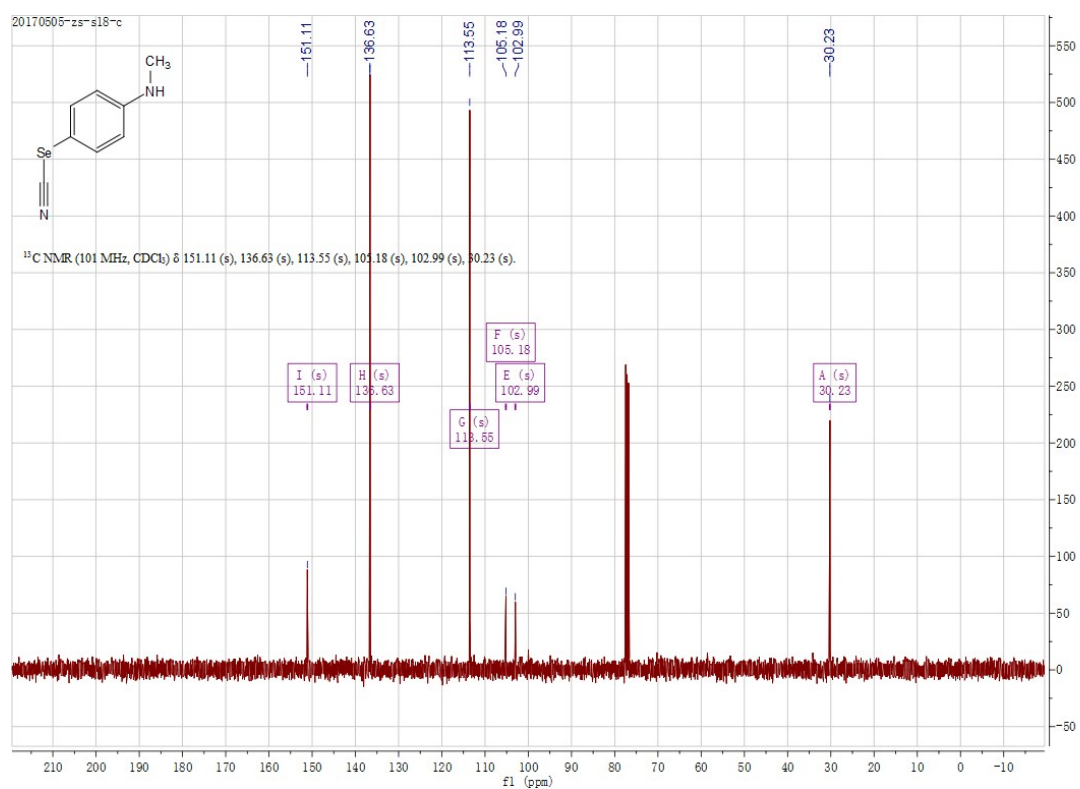

3b

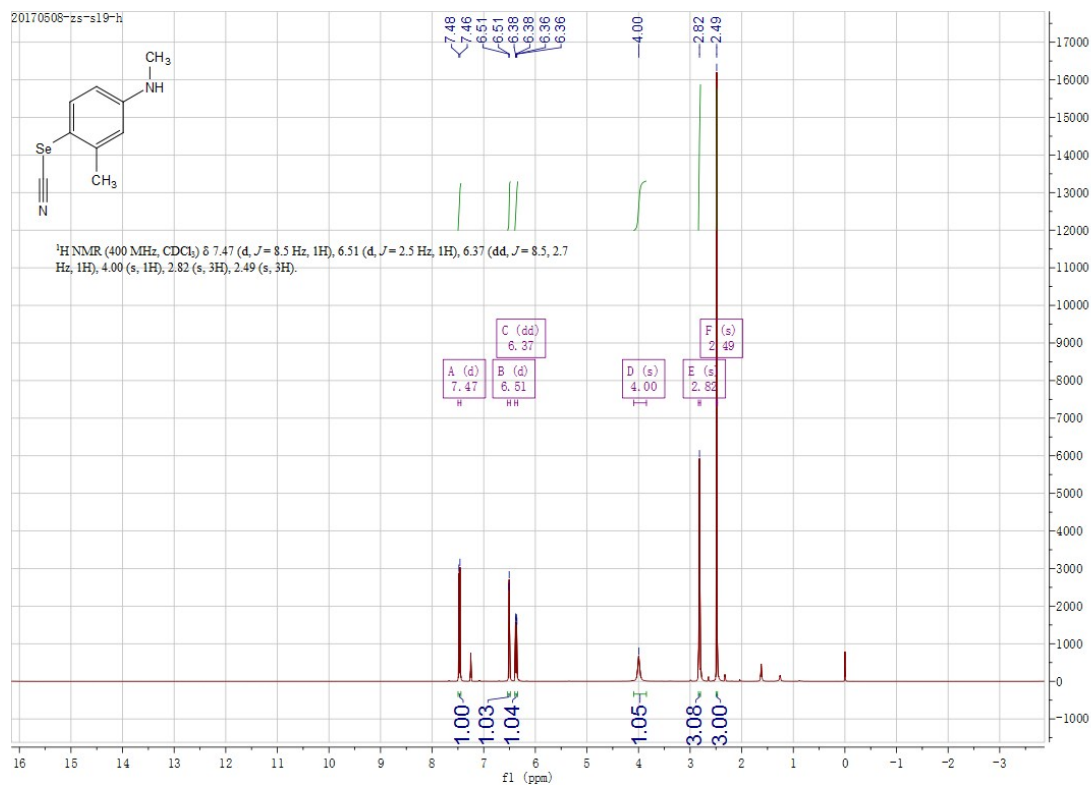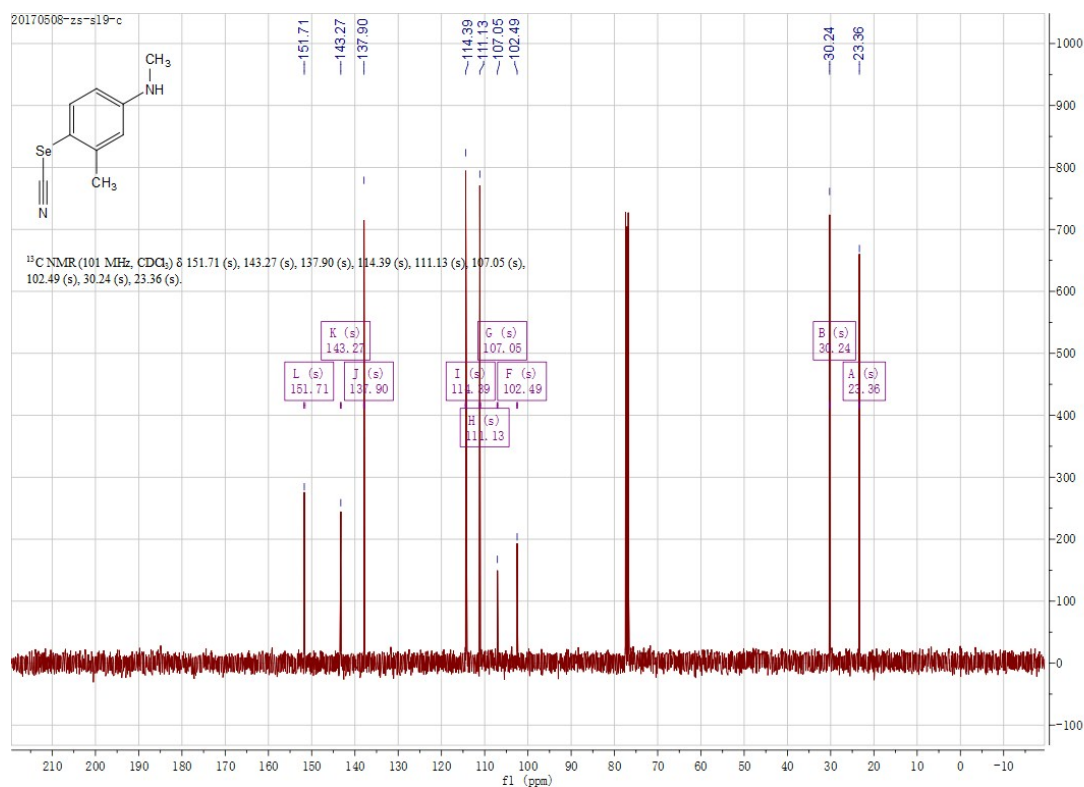

3c

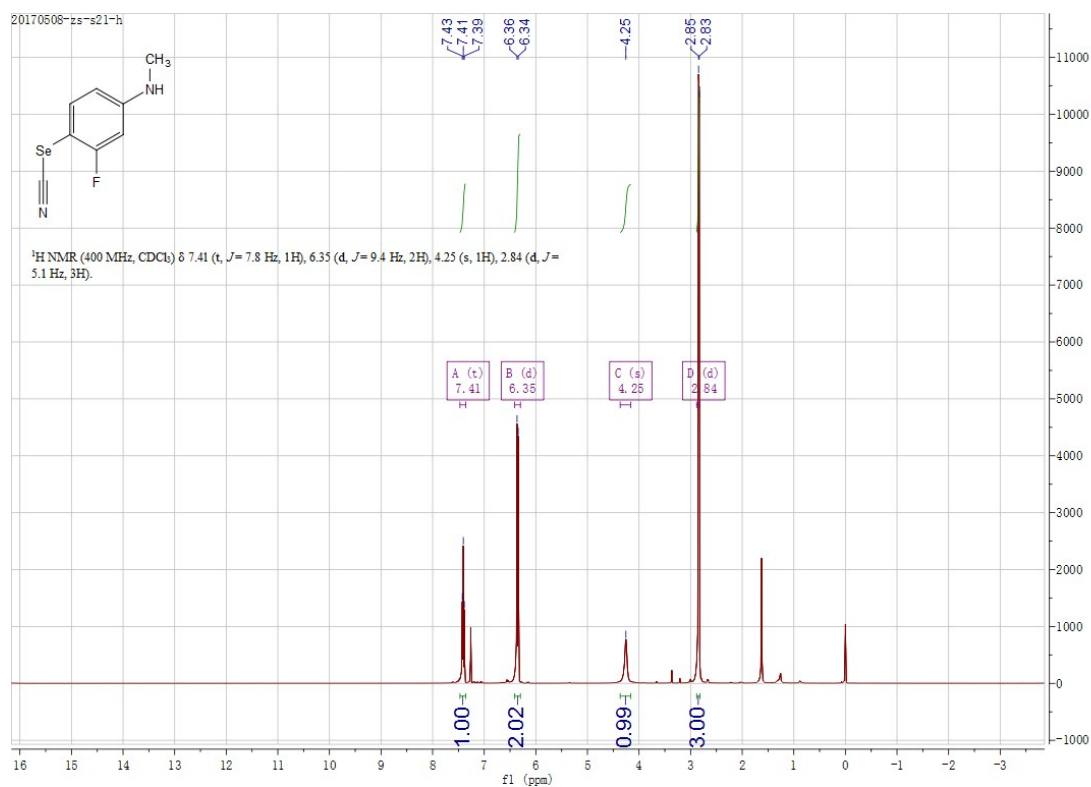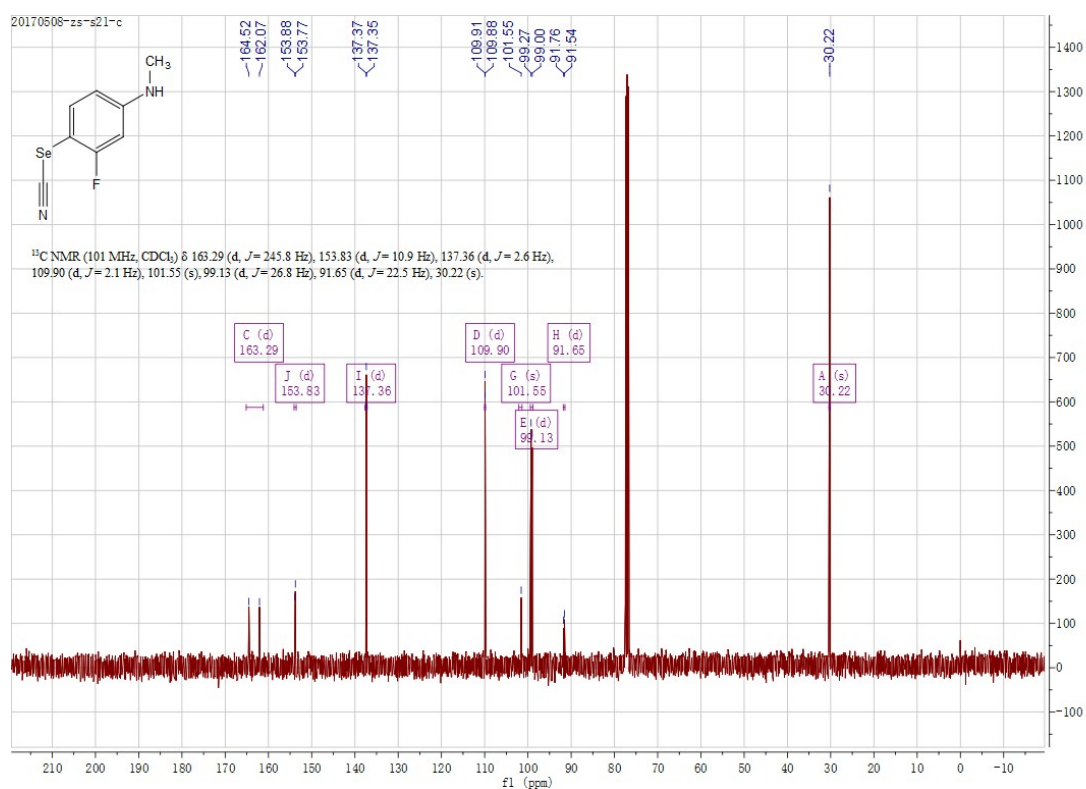

3d

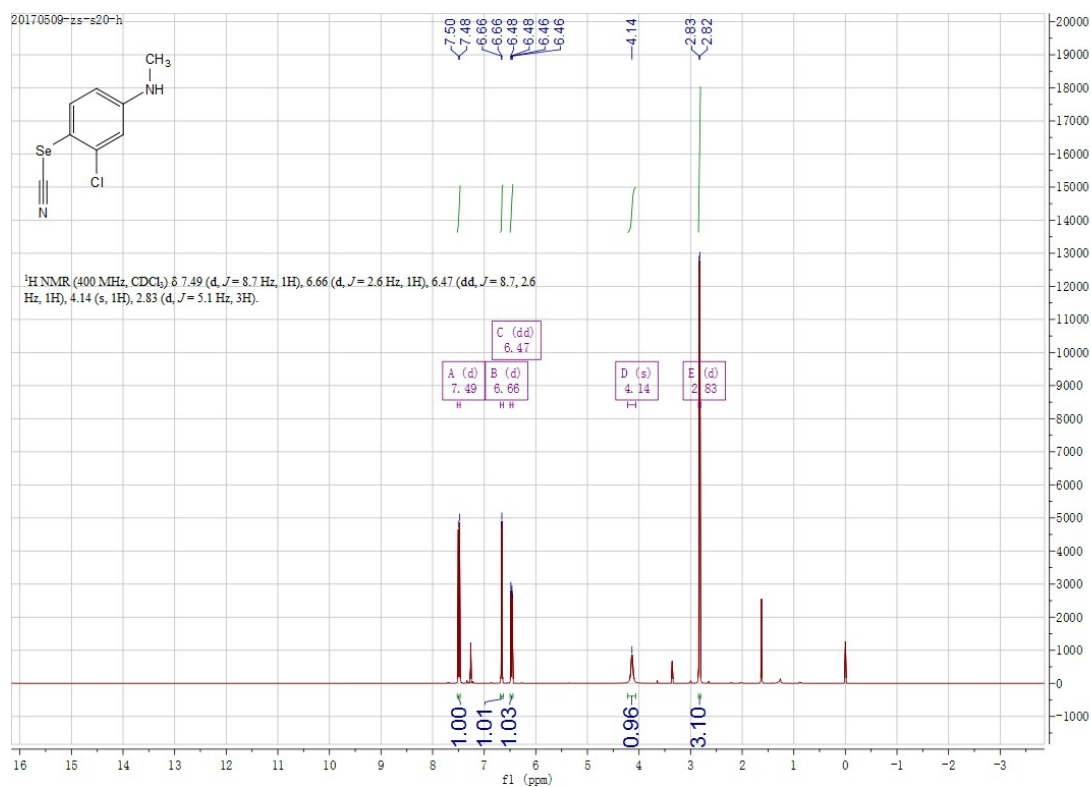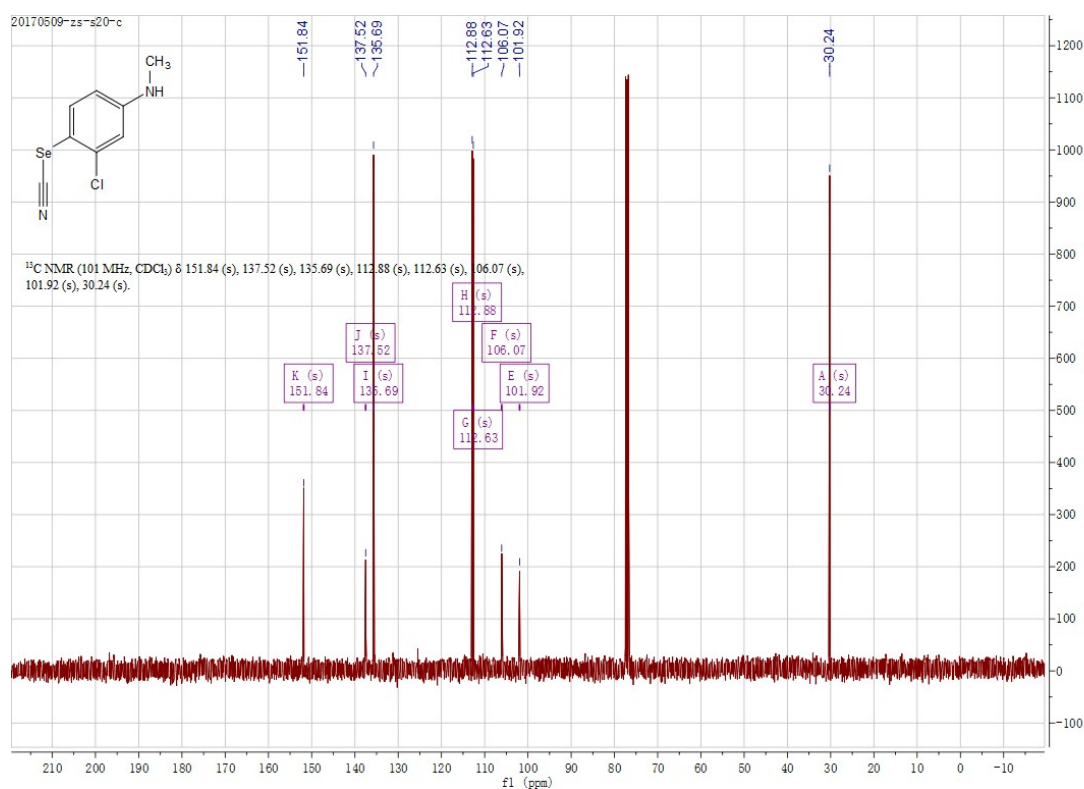

3e

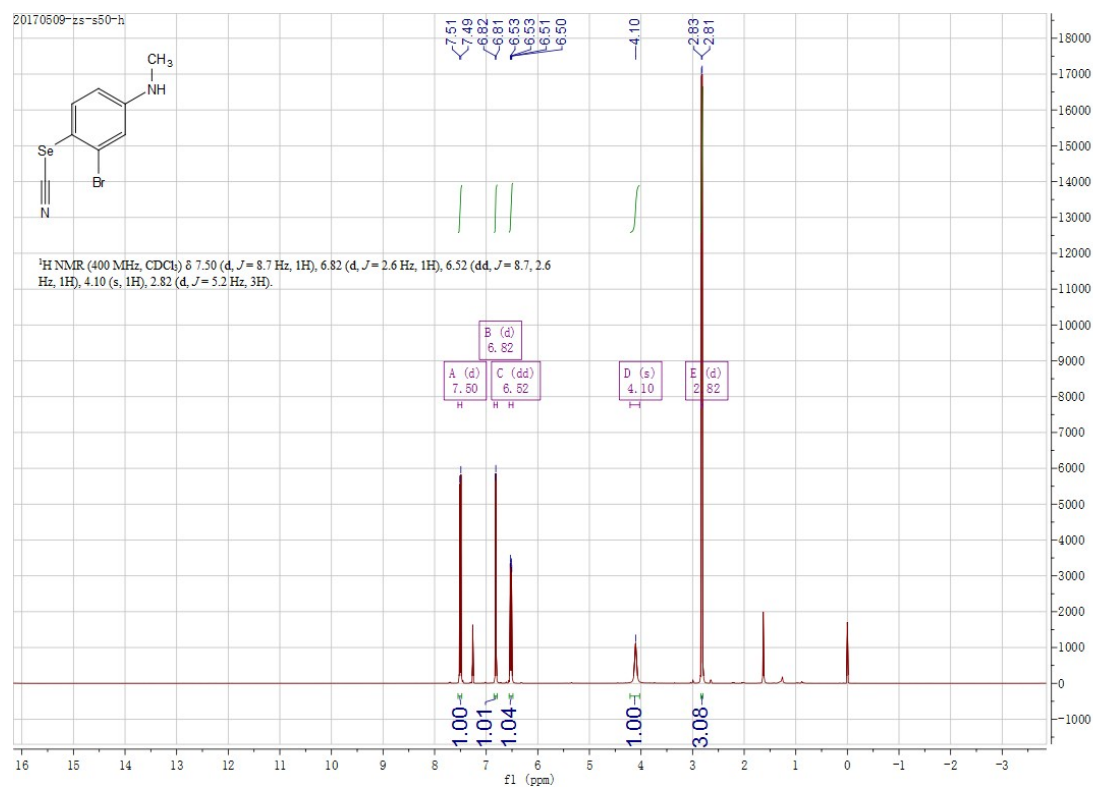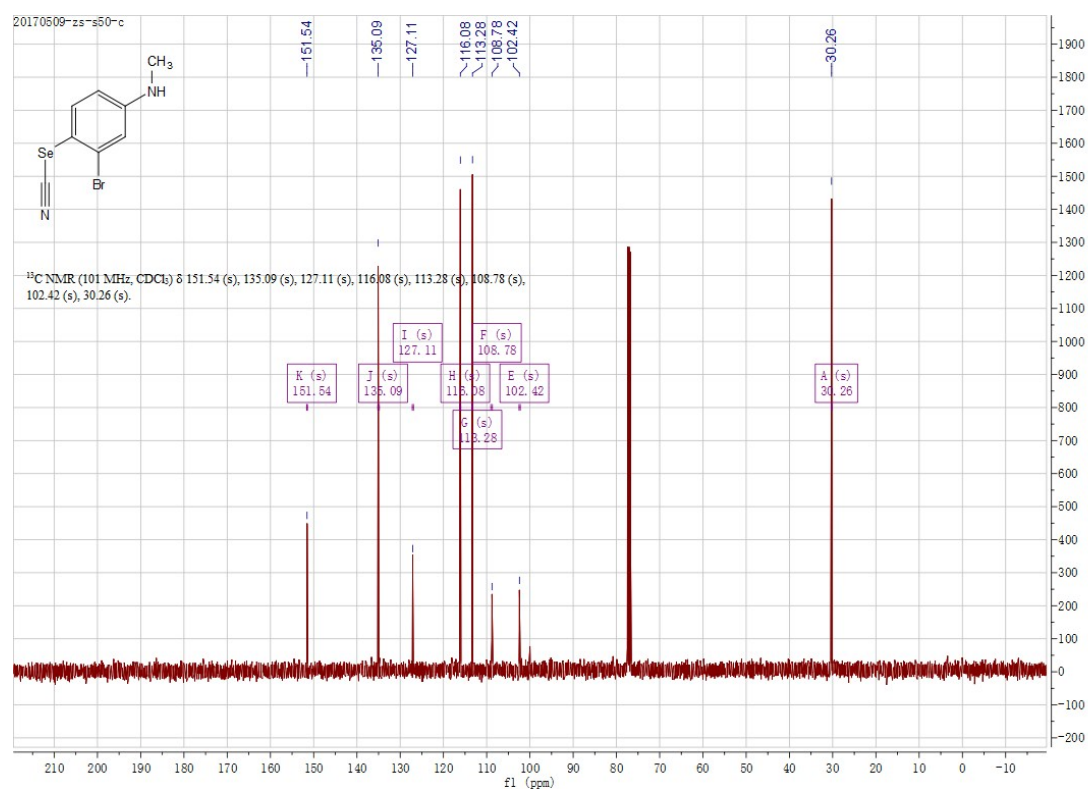

3f

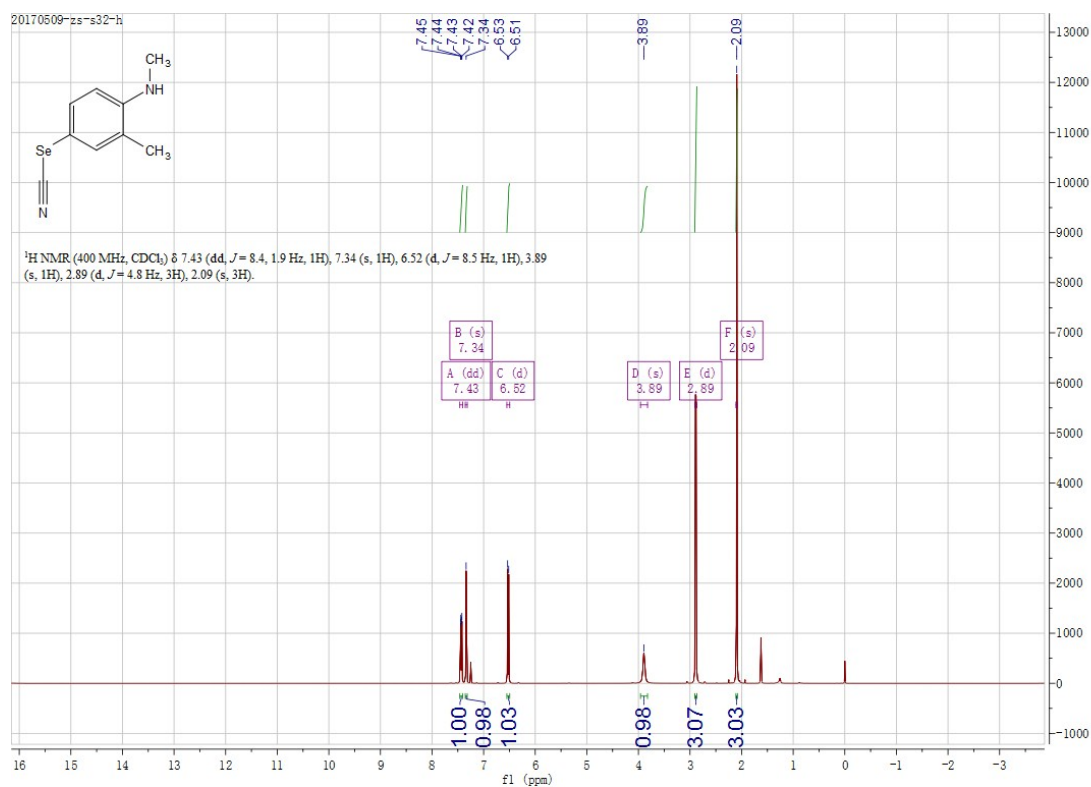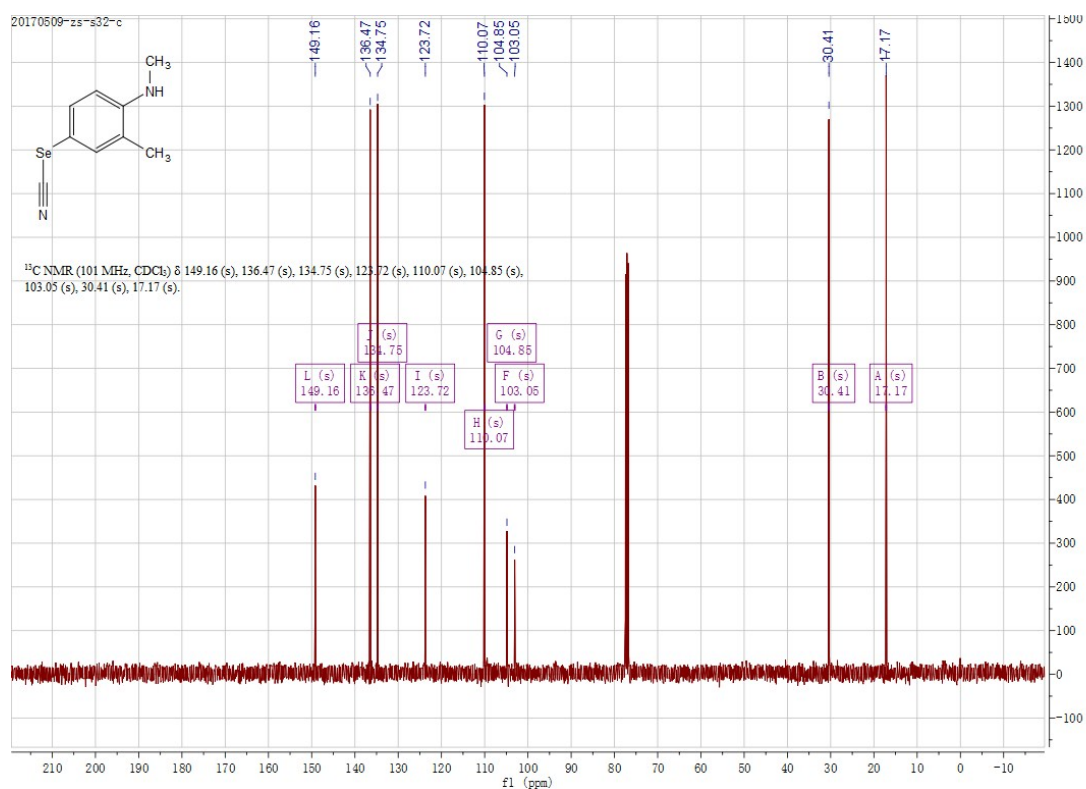

3g

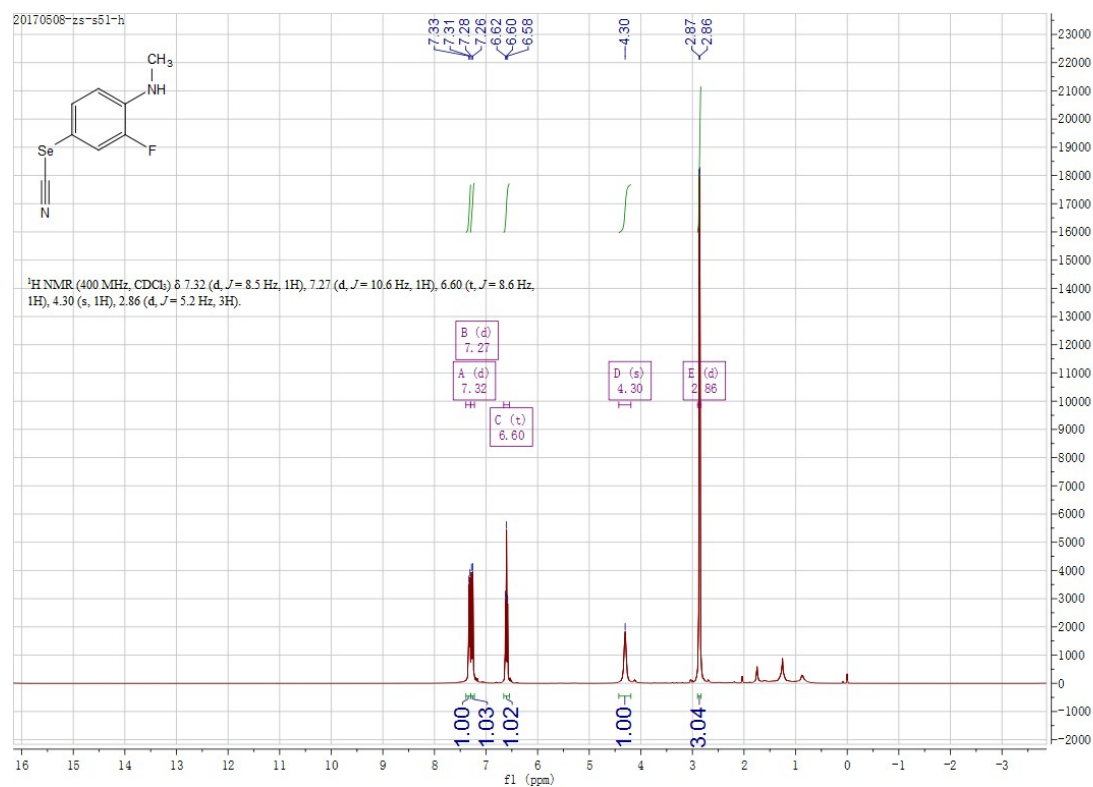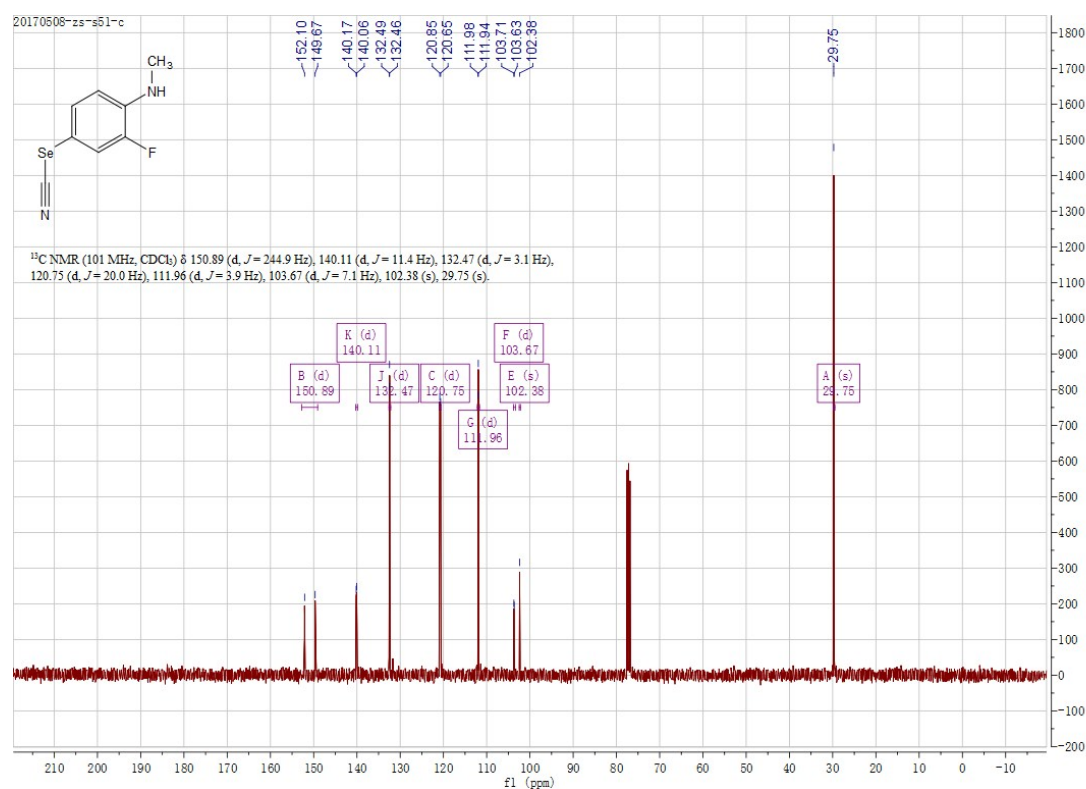



3h

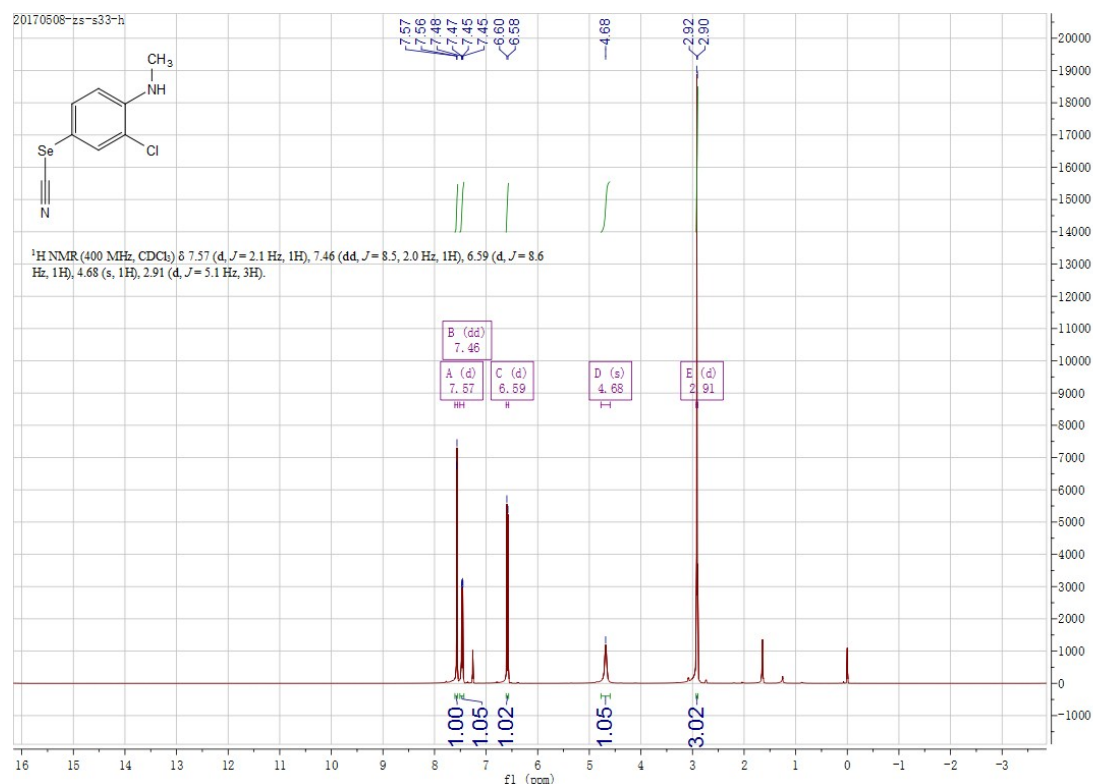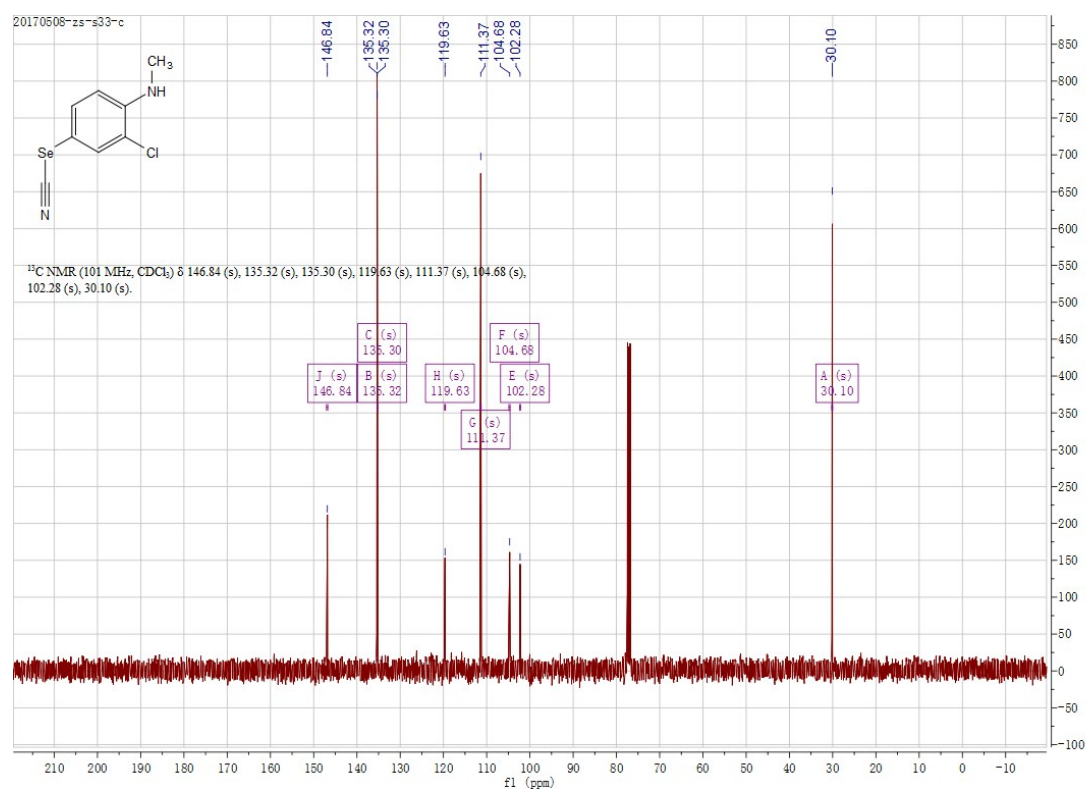

3i

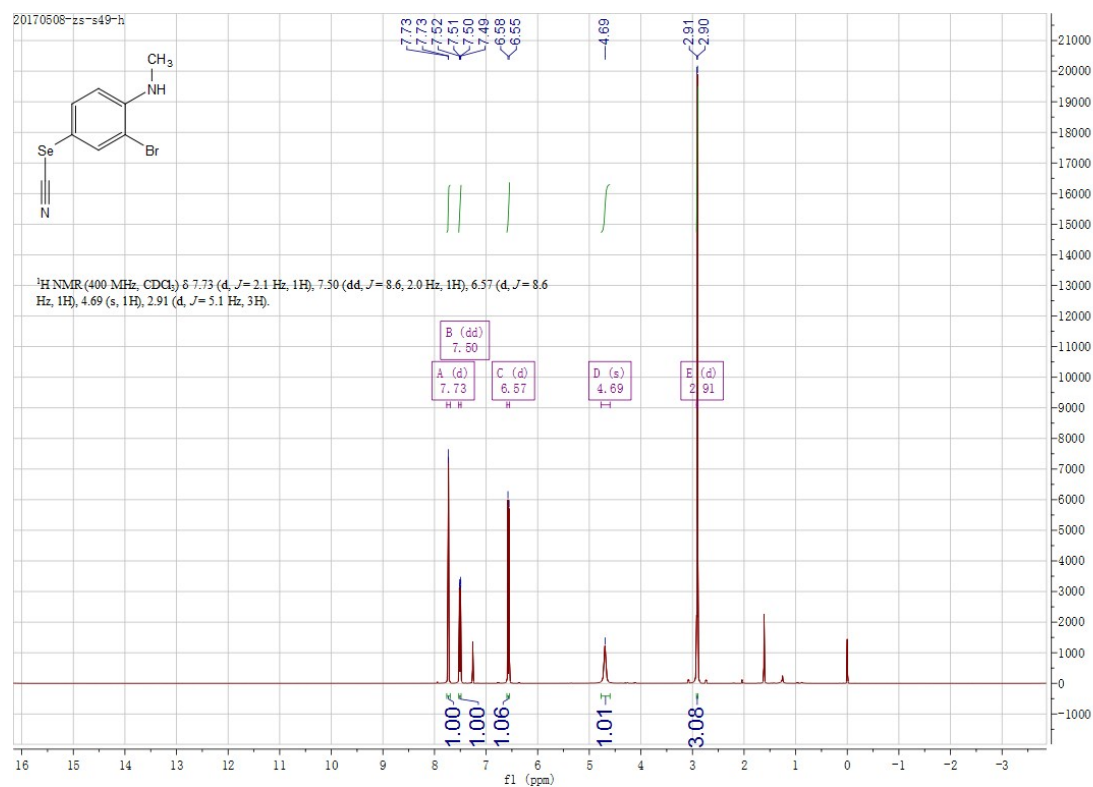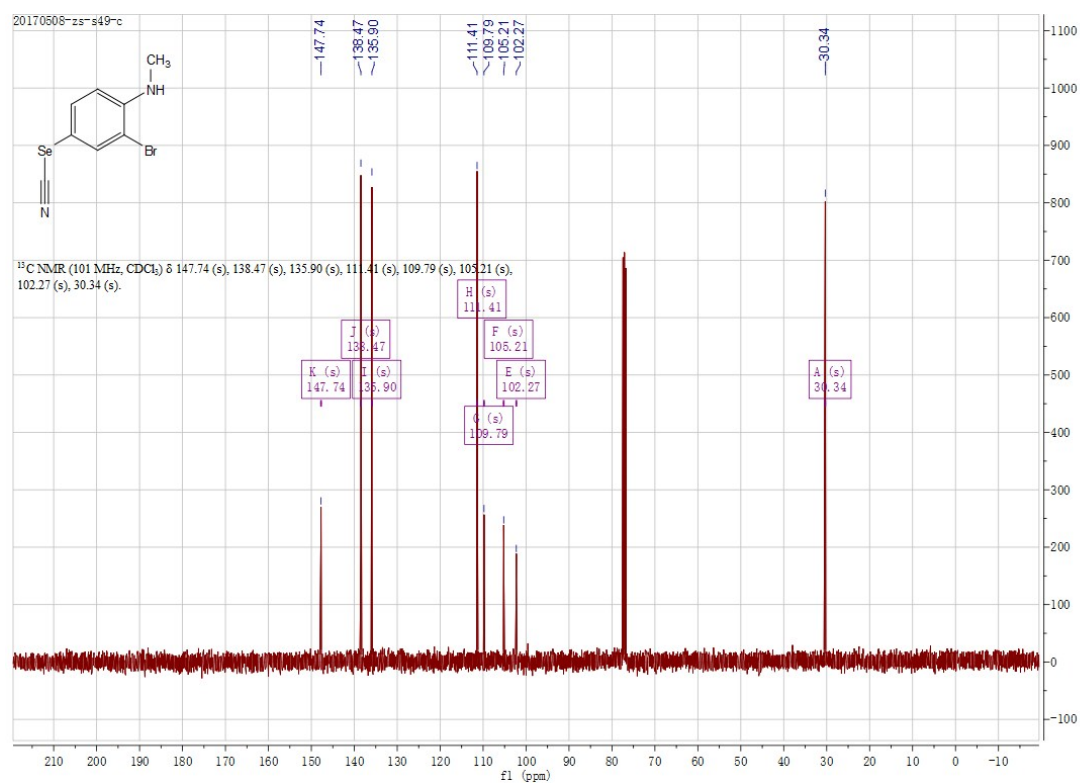

4a

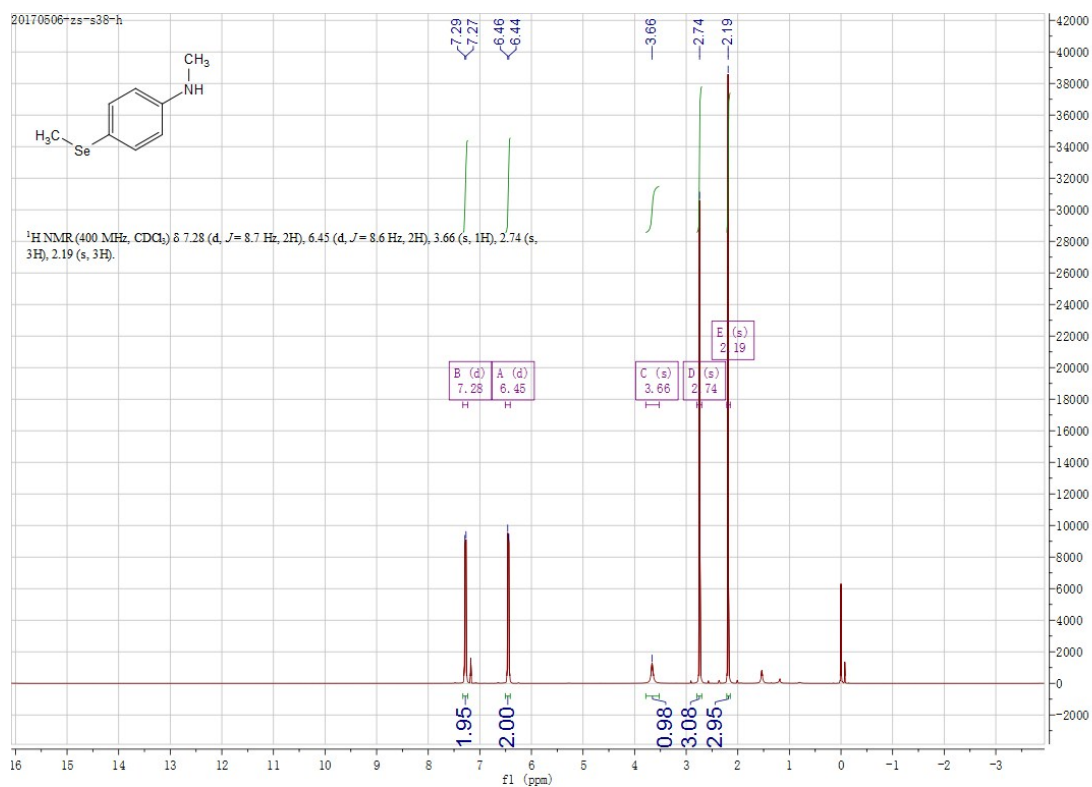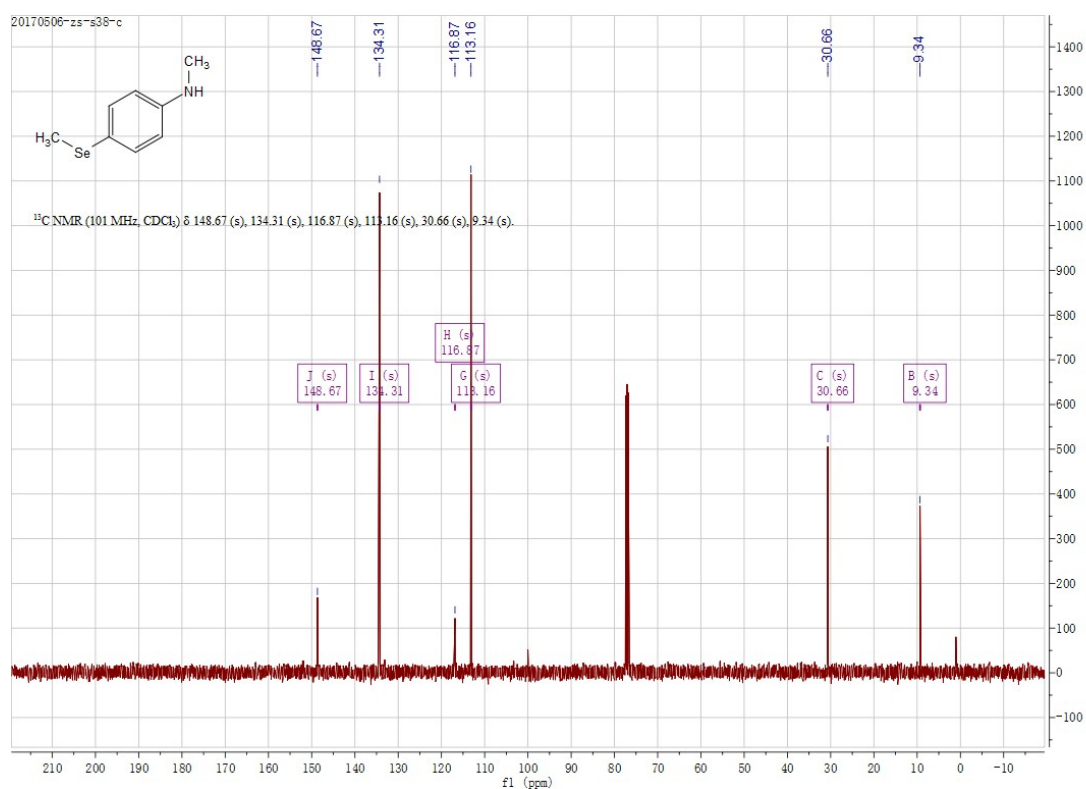

4c

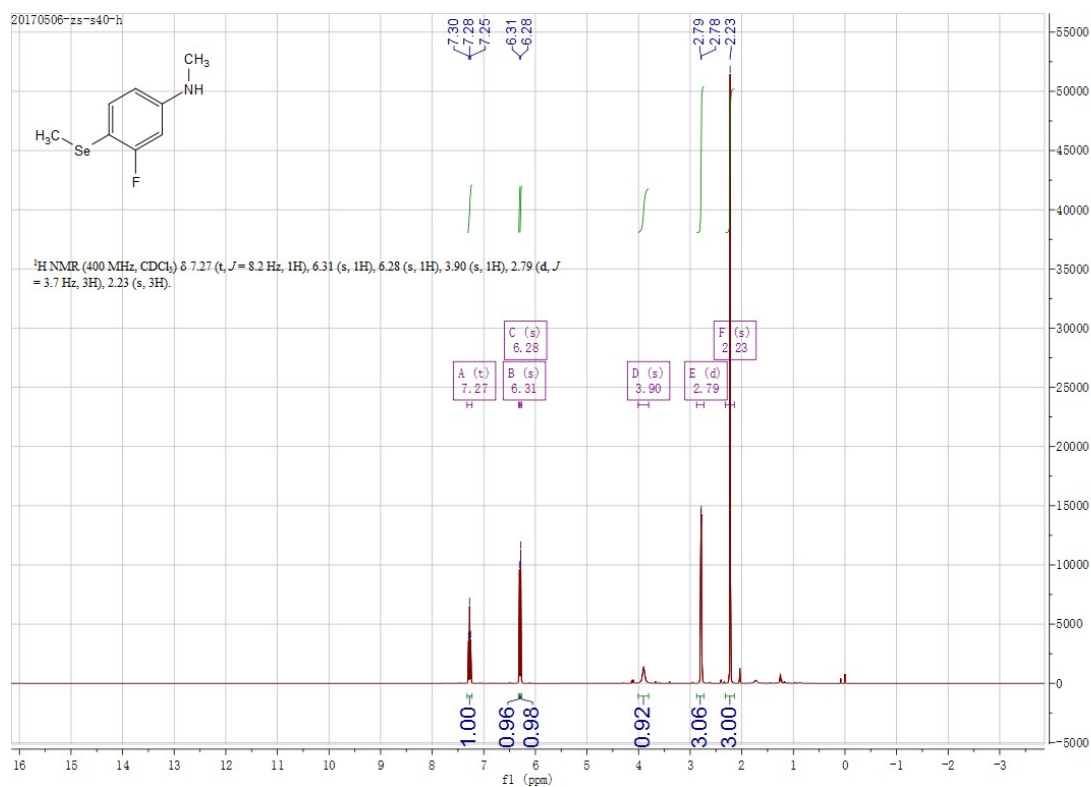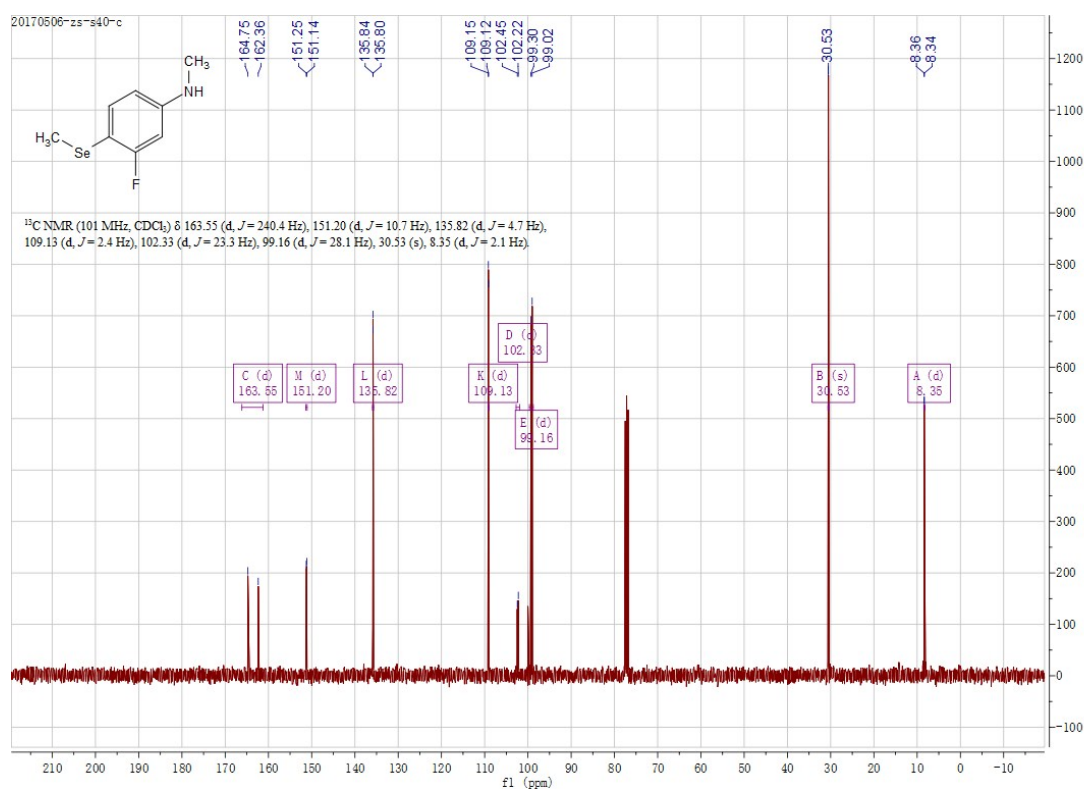

4e

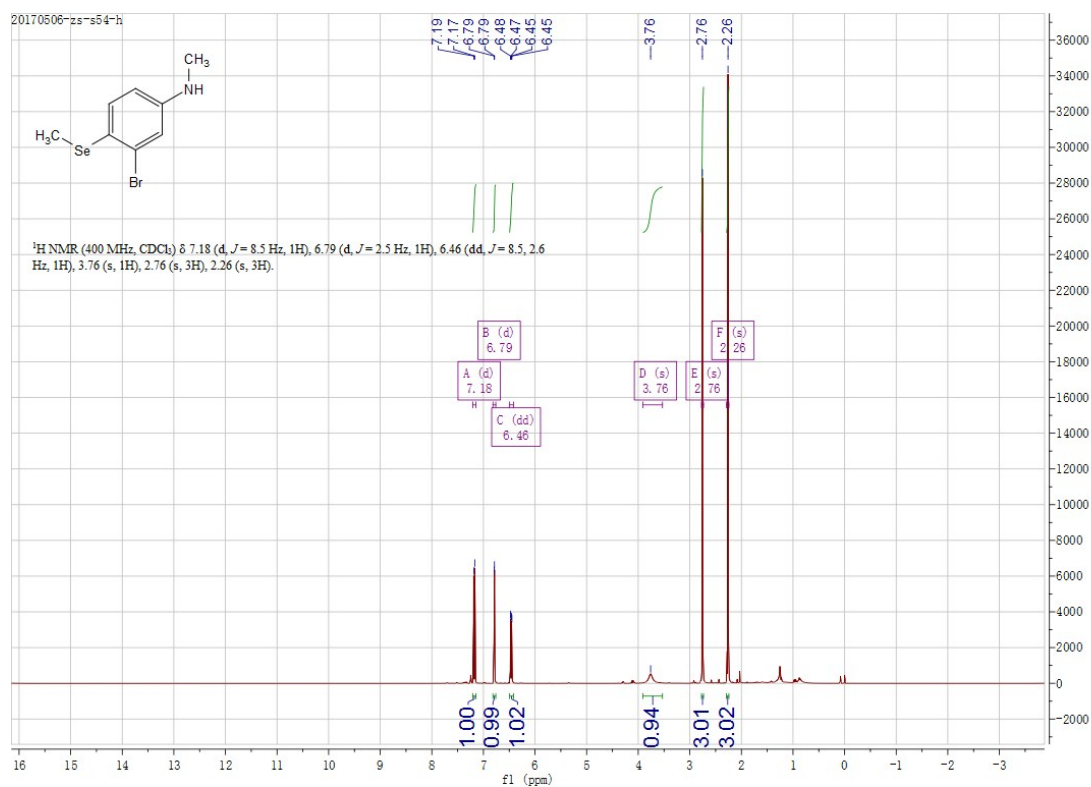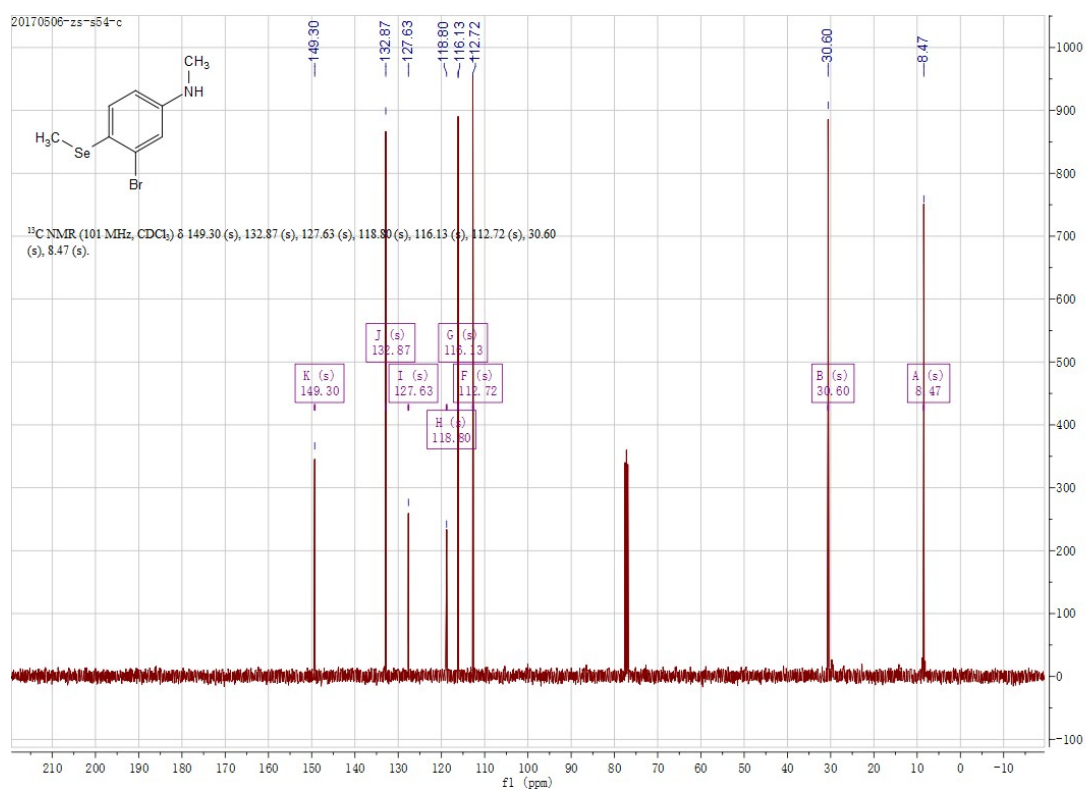

4g

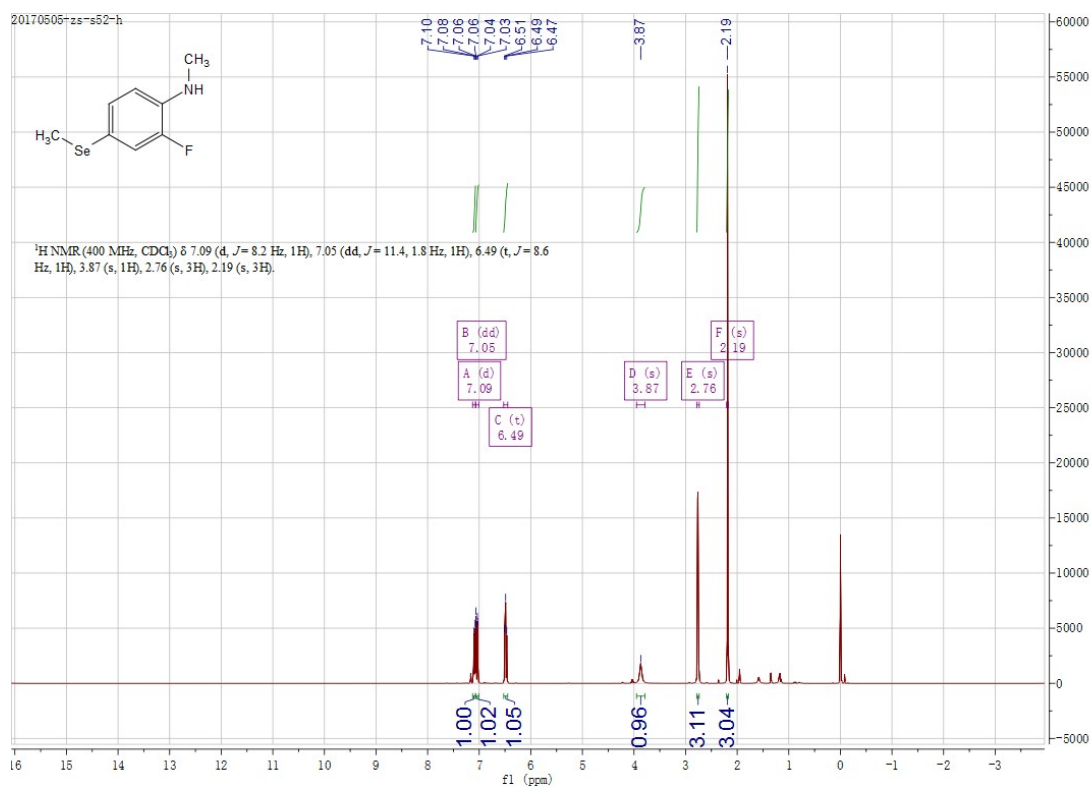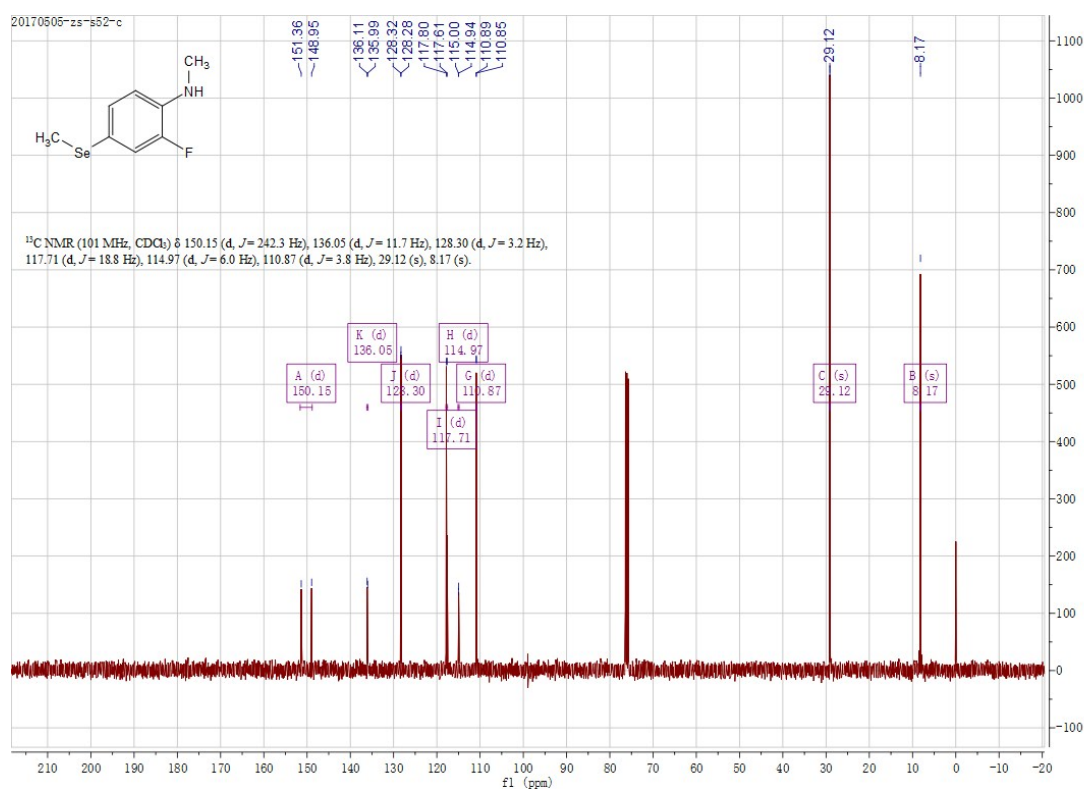



4h

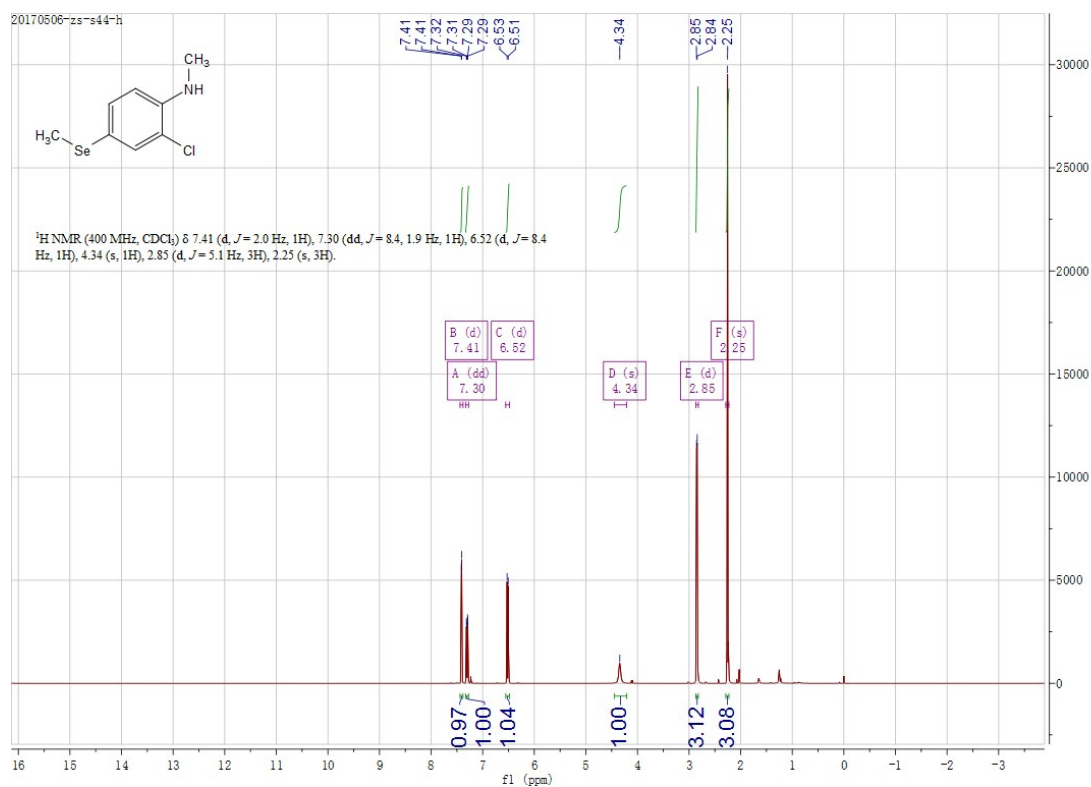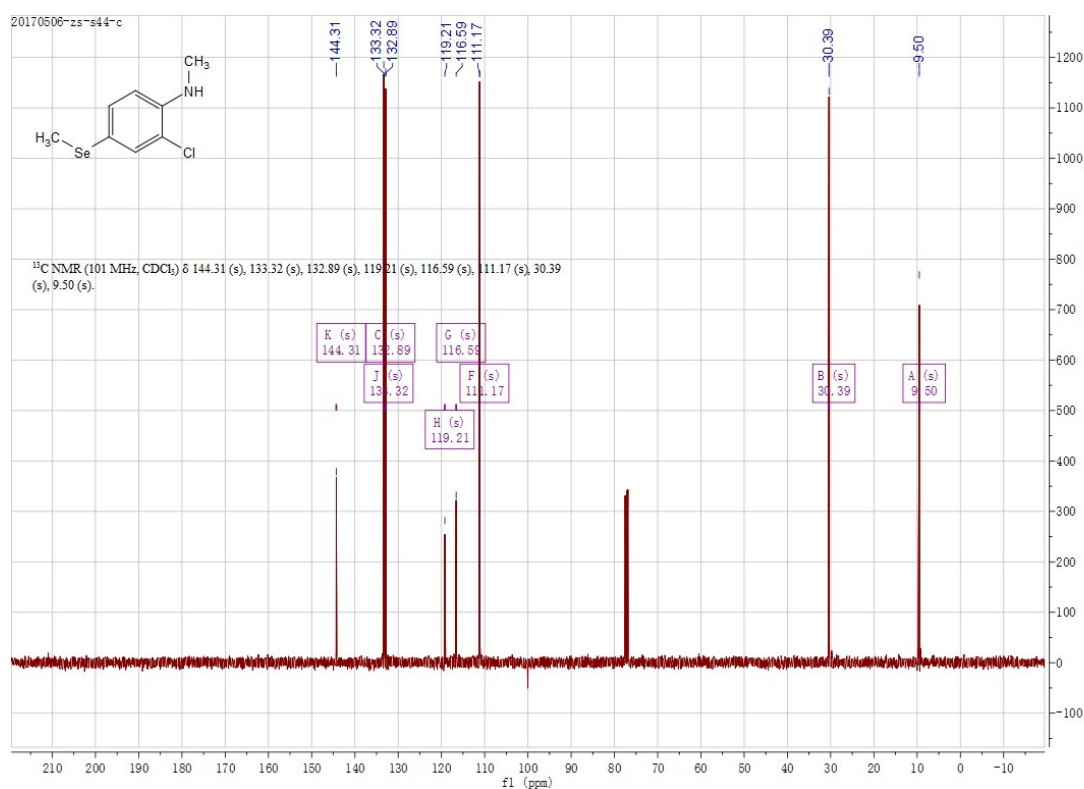

4i

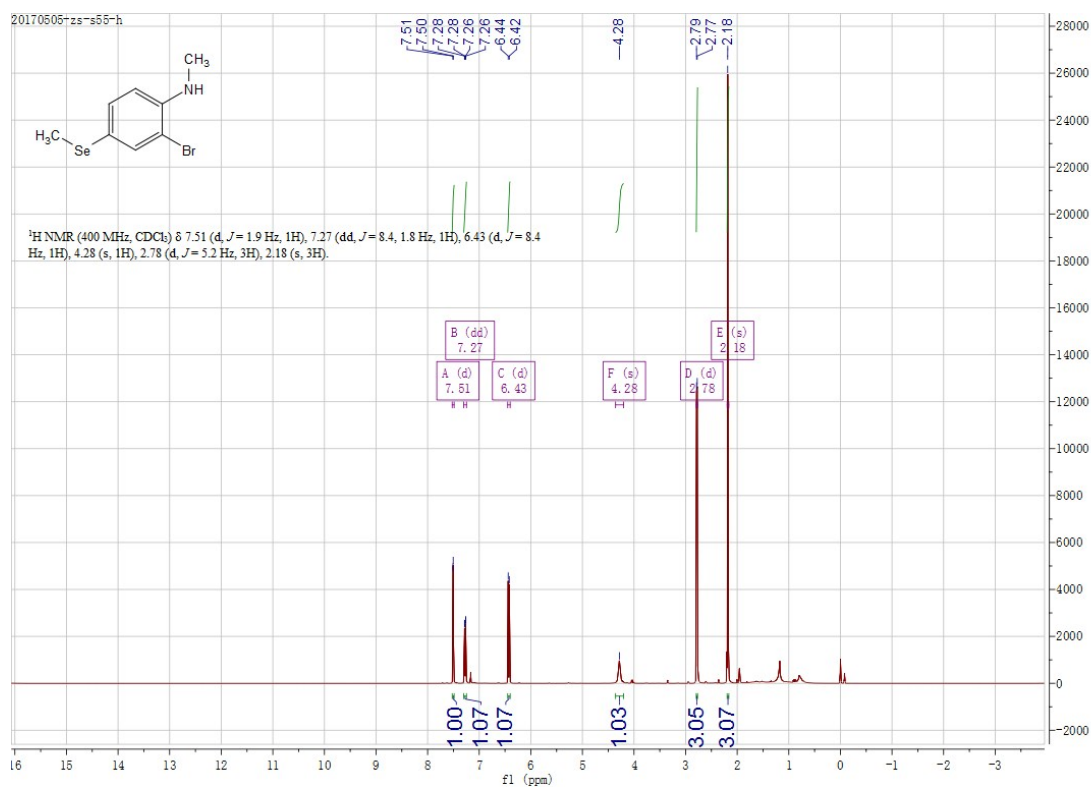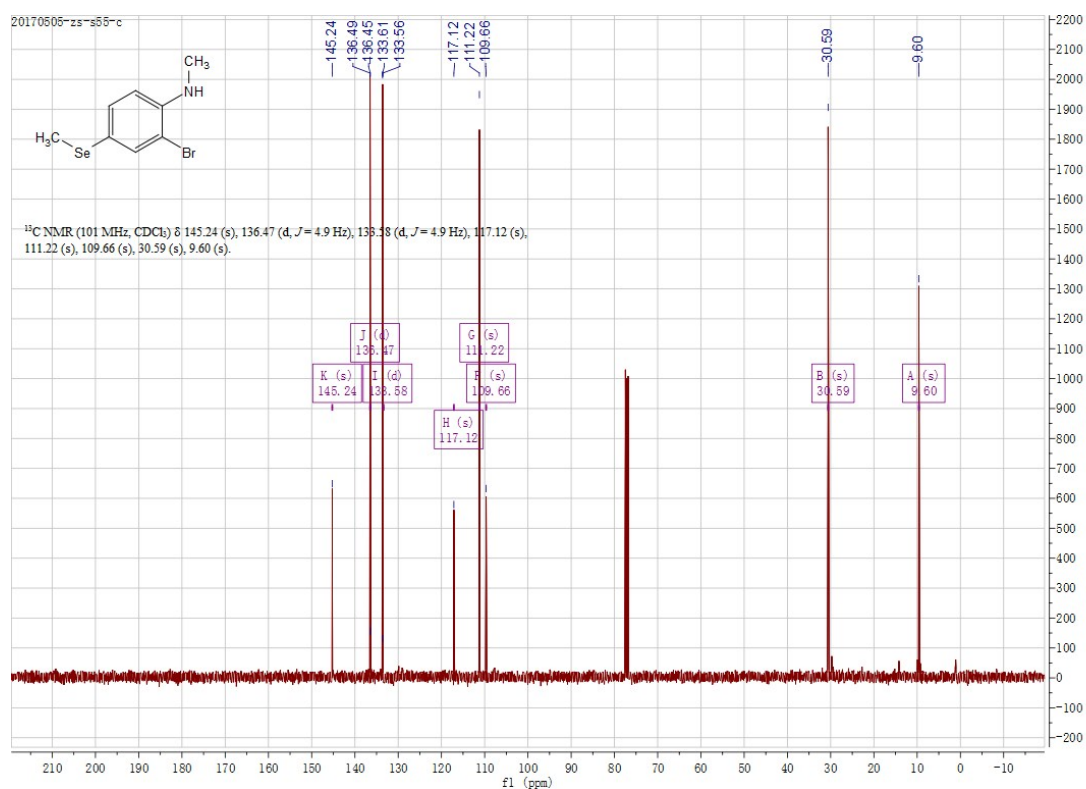

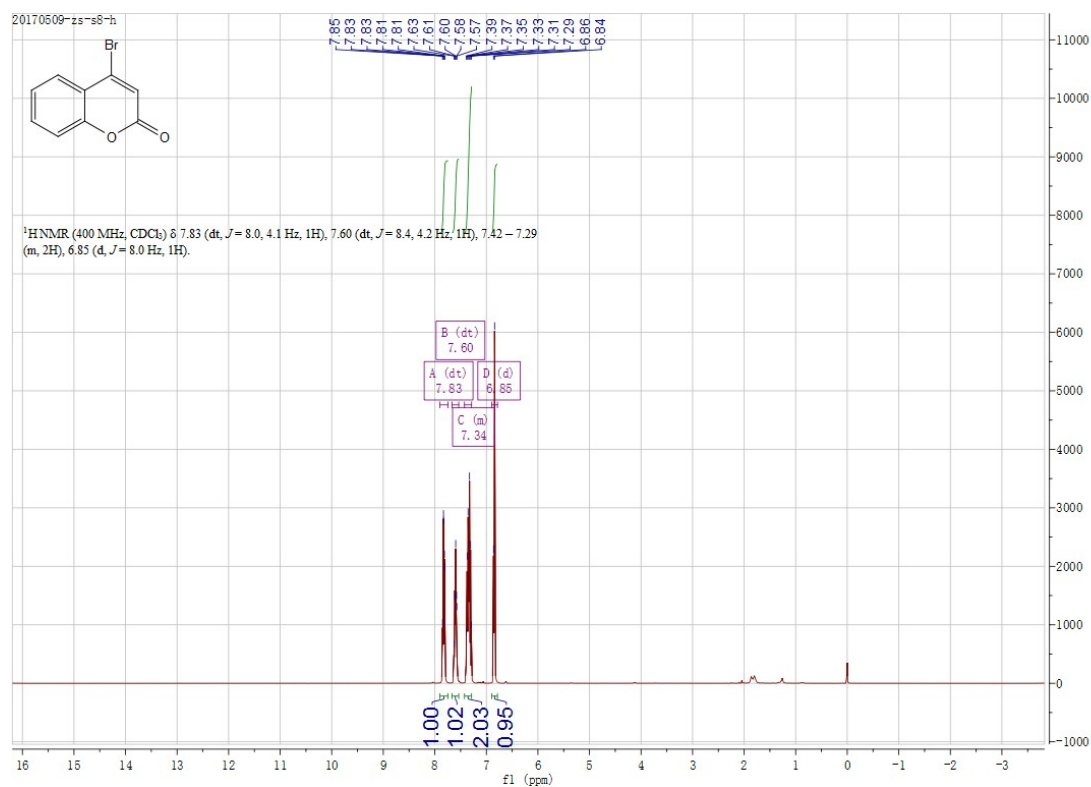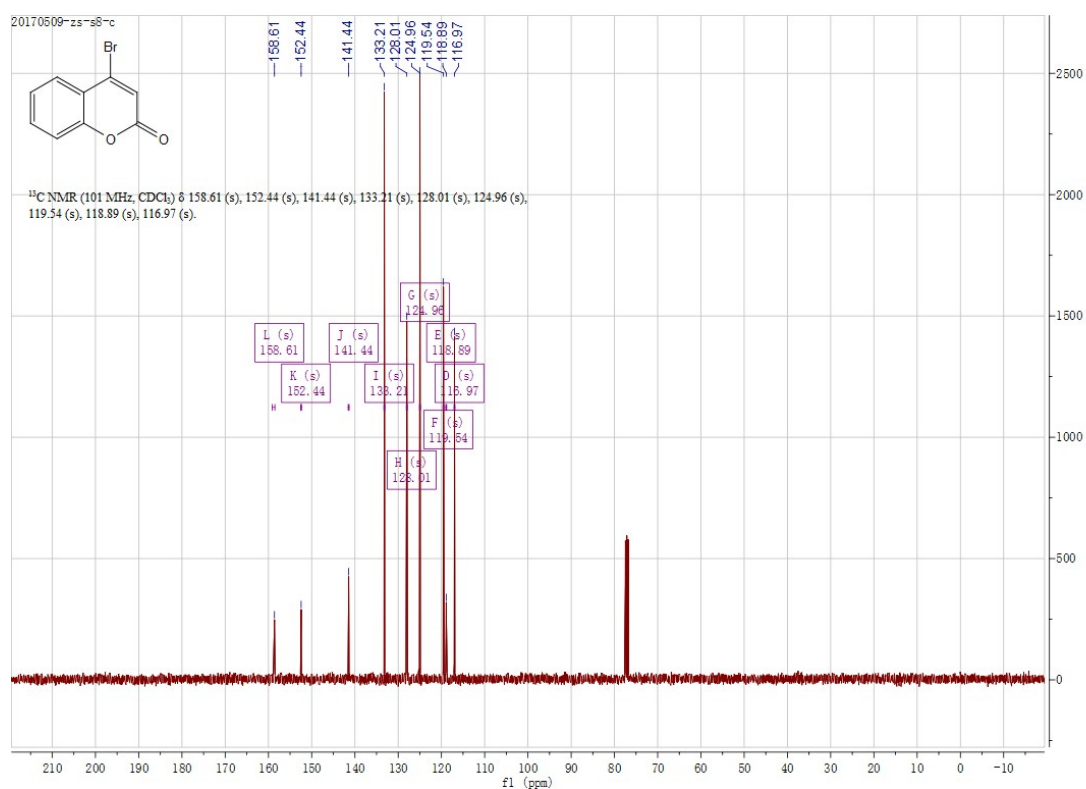

SI3. HPLC chromatograms of target compounds.

5a

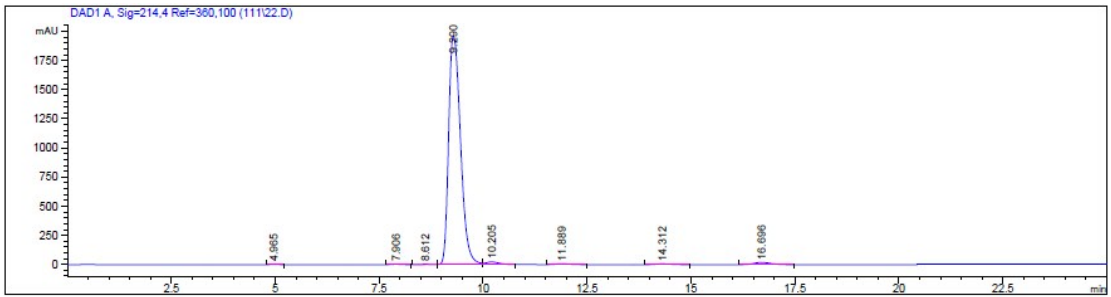

信号 1: DAD1 A, Sig=214,4 Ref=360,100

| 峰 # | 保留时间 [min] | 类型 | 峰宽 [min] | 峰面积 [mAU*s] | 峰高 [mAU]   | 峰面积 %   |
|-----|------------|----|----------|-------------|------------|---------|
| 1   | 4.965      | BB | 0.1538   | 29.80213    | 2.95197    | 0.0738  |
| 2   | 7.906      | BB | 0.2085   | 53.32410    | 3.97602    | 0.1320  |
| 3   | 8.612      | BV | 0.2781   | 63.23665    | 3.47899    | 0.1565  |
| 4   | 9.290      | VV | 0.3115   | 3.88544e4   | 1958.47876 | 96.1545 |
| 5   | 10.205     | VB | 0.3176   | 484.04605   | 22.62786   | 1.1979  |
| 6   | 11.889     | BB | 0.3377   | 184.81200   | 8.23838    | 0.4574  |
| 7   | 14.312     | BB | 0.3929   | 182.29555   | 7.06848    | 0.4511  |
| 8   | 16.696     | BB | 0.4551   | 556.37531   | 18.80707   | 1.3769  |

总量 : 4.04083e4 2025.62753

5b

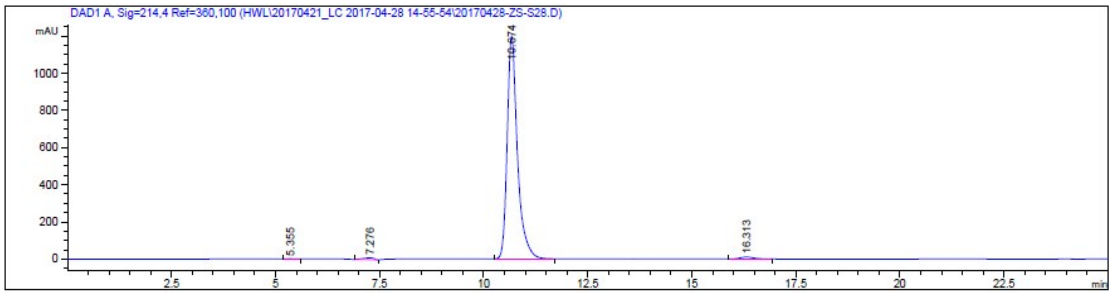

信号 1: DAD1 A, Sig=214,4 Ref=360,100

| 峰<br># | 保留时间<br>[min] | 类型 | 峰宽<br>[min] | 峰面积<br>[mAU*s] | 峰高<br>[mAU] | 峰面积<br>% |
|--------|---------------|----|-------------|----------------|-------------|----------|
| 1      | 5.355         | BB | 0.1535      | 18.26600       | 1.75384     | 0.0871   |
| 2      | 7.276         | BV | 0.2367      | 170.42955      | 10.42422    | 0.8124   |
| 3      | 10.674        | BB | 0.2540      | 2.05357e4      | 1198.21057  | 97.8836  |
| 4      | 16.313        | BB | 0.3768      | 255.32059      | 10.45871    | 1.2170   |

总量 : 2.09797e4 1220.84735

5d

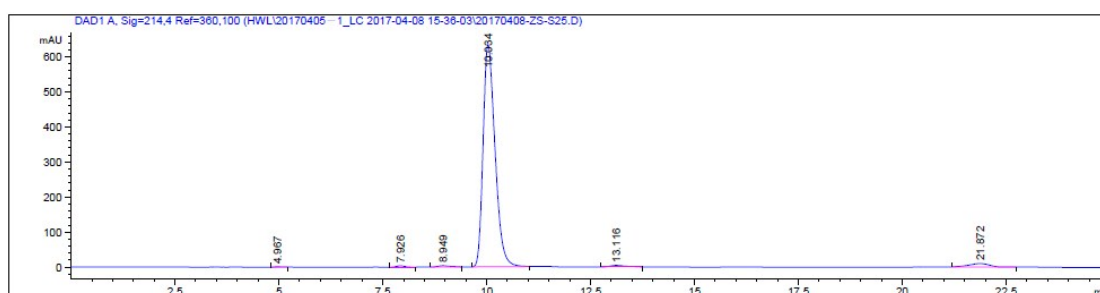

信号 1: DAD1 A, Sig=214,4 Ref=360,100

| 峰<br># | 保留时间<br>[min] | 类型 | 峰宽<br>[min] | 峰面积<br>[mAU*s] | 峰高<br>[mAU] | 峰面积<br>% |
|--------|---------------|----|-------------|----------------|-------------|----------|
| 1      | 4.967         | BB | 0.1516      | 14.44799       | 1.45860     | 0.1091   |
| 2      | 7.926         | BB | 0.2028      | 51.83836       | 3.95888     | 0.3915   |
| 3      | 8.949         | BB | 0.3051      | 70.61434       | 3.44612     | 0.5333   |
| 4      | 10.034        | BB | 0.3087      | 1.26550e4      | 634.58673   | 95.5707  |
| 5      | 13.116        | BB | 0.3888      | 118.89474      | 4.49250     | 0.8979   |
| 6      | 21.872        | BB | 0.5109      | 330.70428      | 9.76955     | 2.4975   |

总量 : 1.32415e4 657.71239

5f

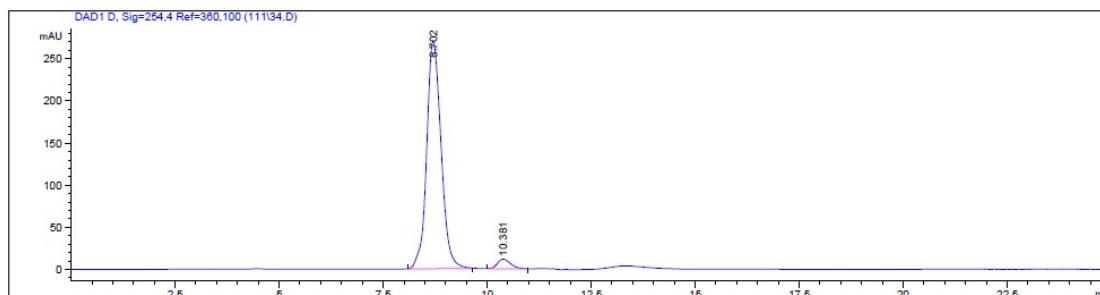

信号 1: DAD1 D, Sig=254,4 Ref=360,100

| 峰<br># | 保留时间<br>[min] | 类型 | 峰宽<br>[min] | 峰面积<br>[mAU*s] | 峰高<br>[mAU] | 峰面积<br>% |
|--------|---------------|----|-------------|----------------|-------------|----------|
| 1      | 8.702         | BB | 0.3792      | 6517.57129     | 270.41797   | 96.3678  |
| 2      | 10.381        | BB | 0.3403      | 245.65152      | 11.35811    | 3.6322   |

总量 : 6763.22281 281.77608



6a

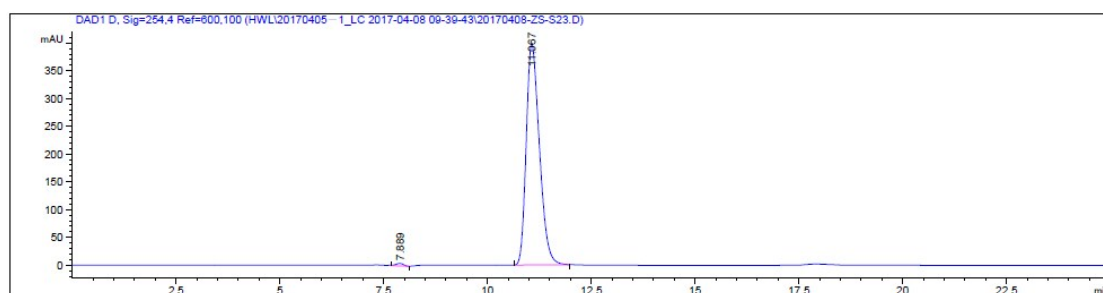

信号 1: DAD1 D, Sig=254,4 Ref=600,100

| 峰 # | 保留时间 [min] | 类型 | 峰宽 [min] | 峰面积 [mAU*s] | 峰高 [mAU]  | 峰面积 %   |
|-----|------------|----|----------|-------------|-----------|---------|
| 1   | 7.889      | BV | 0.2001   | 60.21667    | 4.62014   | 0.6797  |
| 2   | 11.067     | BB | 0.3414   | 8798.48047  | 398.75320 | 99.3203 |

总量 : 8858.69714 403.37335

6b

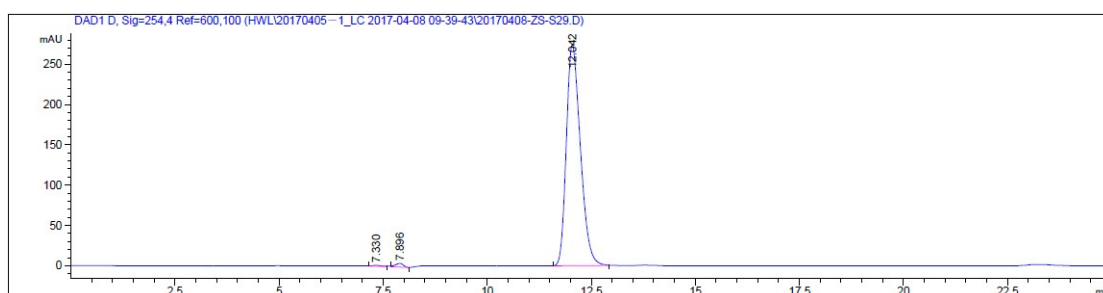

信号 1: DAD1 D, Sig=254,4 Ref=600,100

| 峰 # | 保留时间 [min] | 类型 | 峰宽 [min] | 峰面积 [mAU*s] | 峰高 [mAU]  | 峰面积 %   |
|-----|------------|----|----------|-------------|-----------|---------|
| 1   | 7.330      | BB | 0.2318   | 16.97533    | 1.03235   | 0.2610  |
| 2   | 7.896      | BV | 0.2020   | 61.11156    | 4.69059   | 0.9395  |
| 3   | 12.042     | BB | 0.3635   | 6426.50830  | 274.16095 | 98.7995 |

总量 : 6504.59519 279.88389

6c

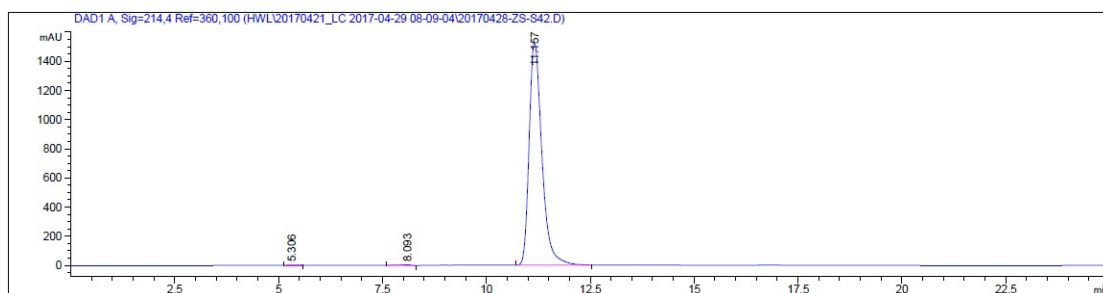

信号 1: DAD1 A, Sig=214,4 Ref=360,100

| 峰 # | 保留时间 [min] | 类型 | 峰宽 [min] | 峰面积 [mAU*s] | 峰高 [mAU]   | 峰面积 %   |
|-----|------------|----|----------|-------------|------------|---------|
| 1   | 5.306      | BB | 0.1654   | 27.09065    | 2.44238    | 0.0828  |
| 2   | 8.093      | BV | 0.2889   | 102.87139   | 4.94067    | 0.3143  |
| 3   | 11.157     | BB | 0.3271   | 3.25973e4   | 1526.43457 | 99.6029 |

总量 : 3.27273e4 1533.81762

6d

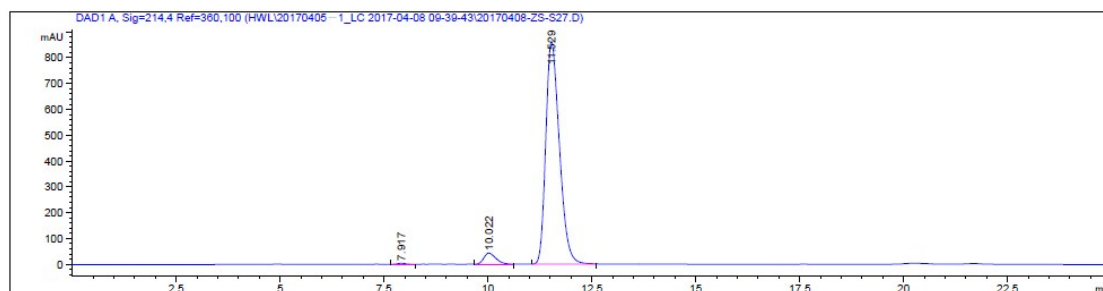

信号 1: DAD1 A, Sig=214,4 Ref=360,100

| 峰 # | 保留时间 [min] | 类型 | 峰宽 [min] | 峰面积 [mAU*s] | 峰高 [mAU]  | 峰面积 %   |
|-----|------------|----|----------|-------------|-----------|---------|
| 1   | 7.917      | BB | 0.2046   | 51.47862    | 3.93598   | 0.2511  |
| 2   | 10.022     | BB | 0.3094   | 860.54681   | 43.01915  | 4.1983  |
| 3   | 11.529     | BB | 0.3492   | 1.95857e4   | 861.59259 | 95.5506 |

总量 : 2.04977e4 908.54772

6e

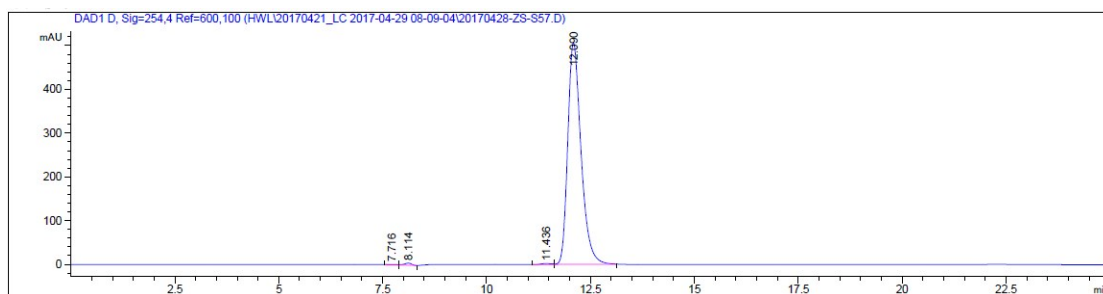

信号 1: DAD1 D, Sig=254,4 Ref=600,100

| 峰 # | 保留时间 [min] | 类型 | 峰宽 [min] | 峰面积 [mAU*s] | 峰高 [mAU]  | 峰面积 %   |
|-----|------------|----|----------|-------------|-----------|---------|
| 1   | 7.716      | BV | 0.1983   | 14.07667    | 1.06463   | 0.1240  |
| 2   | 8.114      | VV | 0.1829   | 57.74492    | 4.85137   | 0.5088  |
| 3   | 11.436     | BV | 0.2744   | 39.93086    | 2.27907   | 0.3518  |
| 4   | 12.090     | VB | 0.3387   | 1.12375e4   | 506.78720 | 99.0153 |

总量 : 1.13493e4 514.98227

6f

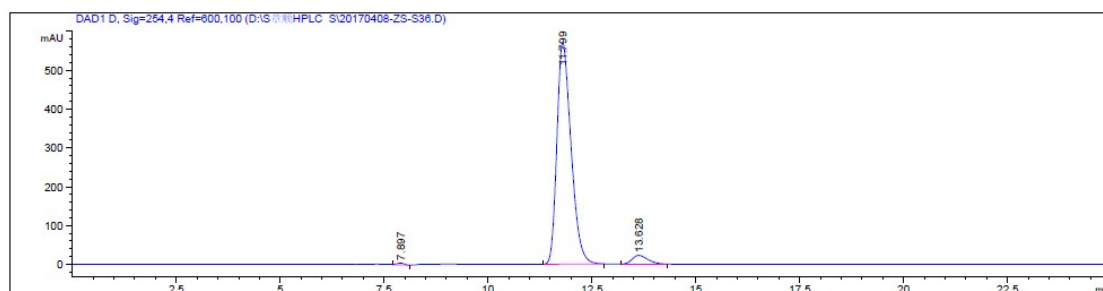

信号 1: DAD1 D, Sig=254,4 Ref=600,100

| 峰 # | 保留时间 [min] | 类型 | 峰宽 [min] | 峰面积 [mAU*s] | 峰高 [mAU]  | 峰面积 %   |
|-----|------------|----|----------|-------------|-----------|---------|
| 1   | 7.897      | BV | 0.1952   | 60.15074    | 4.70264   | 0.4242  |
| 2   | 11.799     | BB | 0.3602   | 1.35255e4   | 571.24225 | 95.3969 |
| 3   | 13.628     | BB | 0.3951   | 592.47699   | 22.65251  | 4.1788  |

总量 : 1.41781e4 598.59740

6g

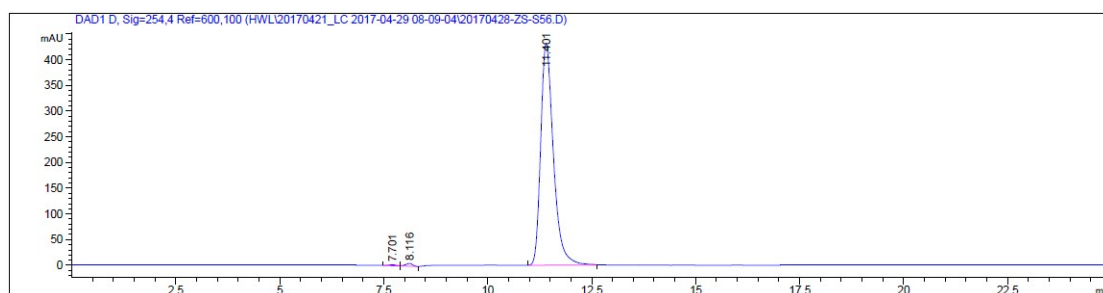

信号 1: DAD1 D, Sig=254,4 Ref=600,100

| 峰 # | 保留时间 [min] | 类型 | 峰宽 [min] | 峰面积 [mAU*s] | 峰高 [mAU]  | 峰面积 %   |
|-----|------------|----|----------|-------------|-----------|---------|
| 1   | 7.701      | BV | 0.2077   | 20.95818    | 1.55090   | 0.2271  |
| 2   | 8.116      | VV | 0.1811   | 61.46288    | 5.22865   | 0.6659  |
| 3   | 11.401     | BB | 0.3217   | 9147.55371  | 430.86957 | 99.1070 |

总量 : 9229.97476 437.64912

6h

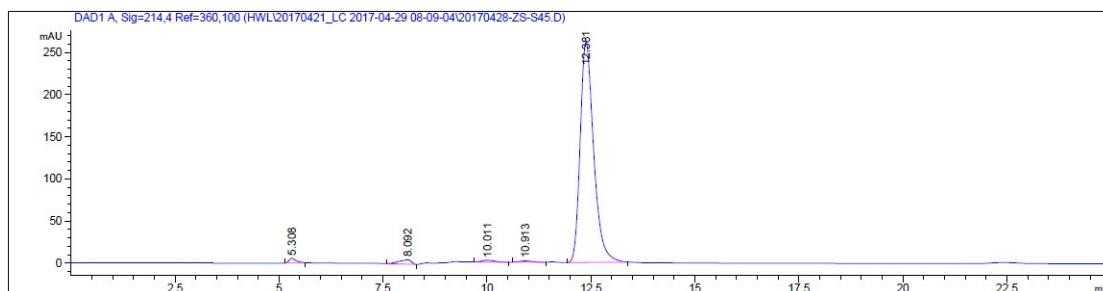

信号 1: DAD1 A, Sig=214,4 Ref=360,100

| 峰 # | 保留时间 [min] | 类型 | 峰宽 [min] | 峰面积 [mAU*s] | 峰高 [mAU]  | 峰面积 %   |
|-----|------------|----|----------|-------------|-----------|---------|
| 1   | 5.308      | BB | 0.1728   | 68.31203    | 5.74381   | 1.1105  |
| 2   | 8.092      | BV | 0.2804   | 106.79716   | 5.27124   | 1.7361  |
| 3   | 10.011     | BB | 0.3001   | 44.63189    | 2.18732   | 0.7255  |
| 4   | 10.913     | BB | 0.3001   | 30.56148    | 1.53609   | 0.4968  |
| 5   | 12.381     | BB | 0.3428   | 5901.18018  | 261.99106 | 95.9310 |

总量 : 6151.48274 276.72952

6i

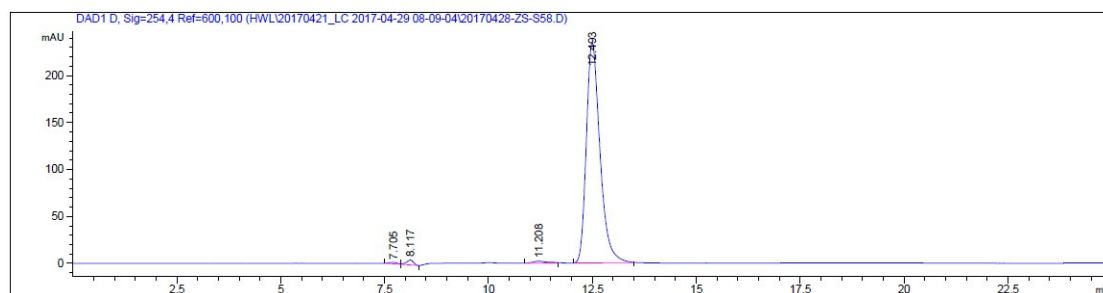

信号 1: DAD1 D, Sig=254,4 Ref=600,100

| 峰 # | 保留时间 [min] | 类型 | 峰宽 [min] | 峰面积 [mAU*s] | 峰高 [mAU]  | 峰面积 %   |
|-----|------------|----|----------|-------------|-----------|---------|
| 1   | 7.705      | BV | 0.2116   | 22.20893    | 1.60383   | 0.4046  |
| 2   | 8.117      | VV | 0.1824   | 60.58751    | 5.18405   | 1.1037  |
| 3   | 11.208     | BB | 0.3410   | 48.75994    | 2.03881   | 0.8883  |
| 4   | 12.493     | BB | 0.3463   | 5357.77637  | 234.68335 | 97.6034 |

总量 : 5489.33276 243.51004

7a

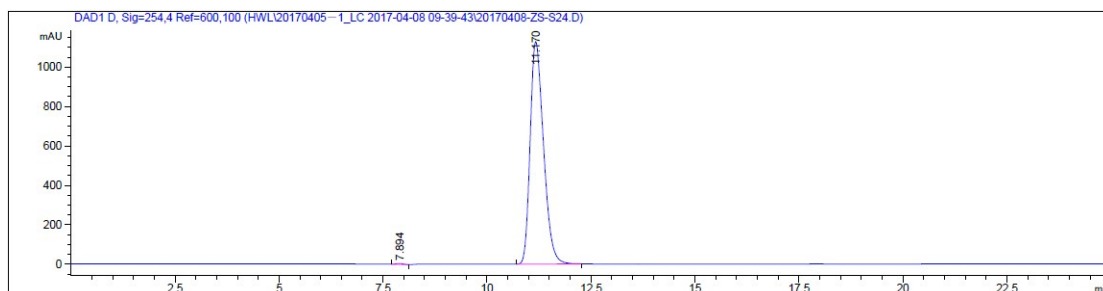

信号 1: DAD1 D, Sig=254,4 Ref=600,100

| 峰 # | 保留时间 [min] | 类型 | 峰宽 [min] | 峰面积 [mAU*s] | 峰高 [mAU]   | 峰面积 %   |
|-----|------------|----|----------|-------------|------------|---------|
| 1   | 7.894      | BV | 0.1981   | 59.68352    | 4.63887    | 0.2365  |
| 2   | 11.170     | BB | 0.3482   | 2.51814e4   | 1128.98633 | 99.7635 |

总量 : 2.52411e4 1133.62520



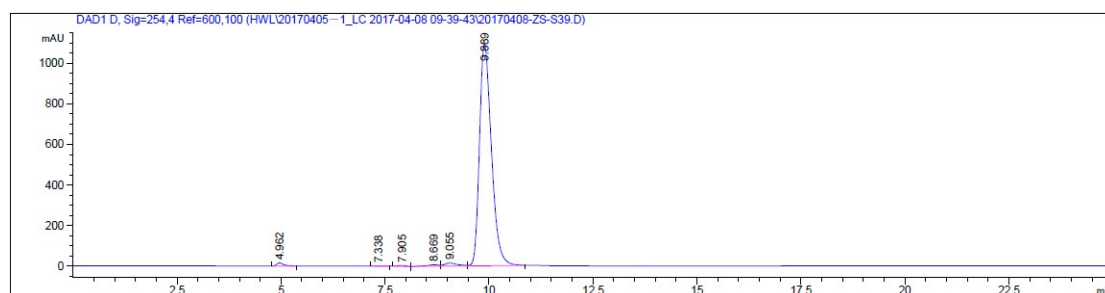

信号 1: DAD1 D, Sig=254,4 Ref=600,100

| 峰<br># | 保留时间<br>[min] | 类型 | 峰宽<br>[min] | 峰面积<br>[mAU*s] | 峰高<br>[mAU] | 峰面积<br>% |
|--------|---------------|----|-------------|----------------|-------------|----------|
| 1      | 4.962         | BB | 0.1815      | 190.74367      | 15.72653    | 0.8459   |
| 2      | 7.338         | BB | 0.2295      | 16.36448       | 1.00730     | 0.0726   |
| 3      | 7.905         | BV | 0.1999      | 60.68776       | 4.66197     | 0.2691   |
| 4      | 8.669         | VV | 0.3080      | 141.36298      | 6.65067     | 0.6269   |
| 5      | 9.055         | VV | 0.3259      | 330.32471      | 14.94251    | 1.4649   |
| 6      | 9.889         | VB | 0.3064      | 2.18092e4      | 1095.00293  | 96.7205  |

总量 : 2.25487e4 1137.99190



## SI4. HR-MS of target compounds

### 5a

Event#: 1 MS(E+) Ret. Time : 1.002 -> 1.002 Scan#: 201 -> 201

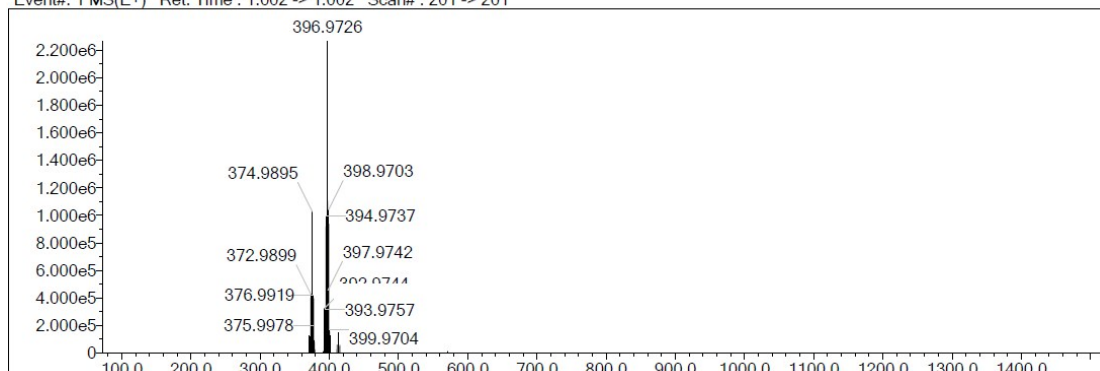

Measured region for 396.9726 m/z

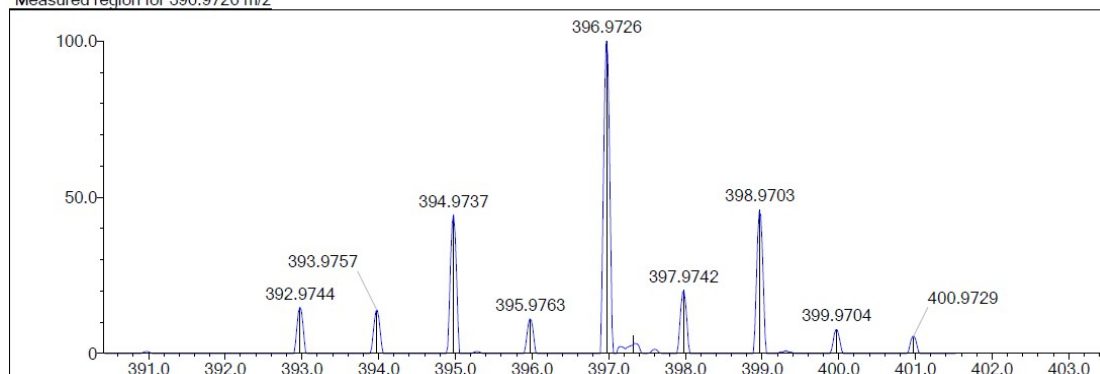

| Rank | Score  | Formula (M)      | Ion                 | Meas. m/z | Pred. m/z | Df. (mDa) | Df. (ppm) | Iso    | DBE  |
|------|--------|------------------|---------------------|-----------|-----------|-----------|-----------|--------|------|
| 2    | 100.00 | C16 H11 N4 Cl Se | [M+Na] <sup>+</sup> | 396.9726  | 396.9728  | -0.2      | -0.50     | 100.00 | 13.0 |

### 5b

Event#: 1 MS(E+) Ret. Time : 1.040 -> 1.040 Scan#: 209 -> 209

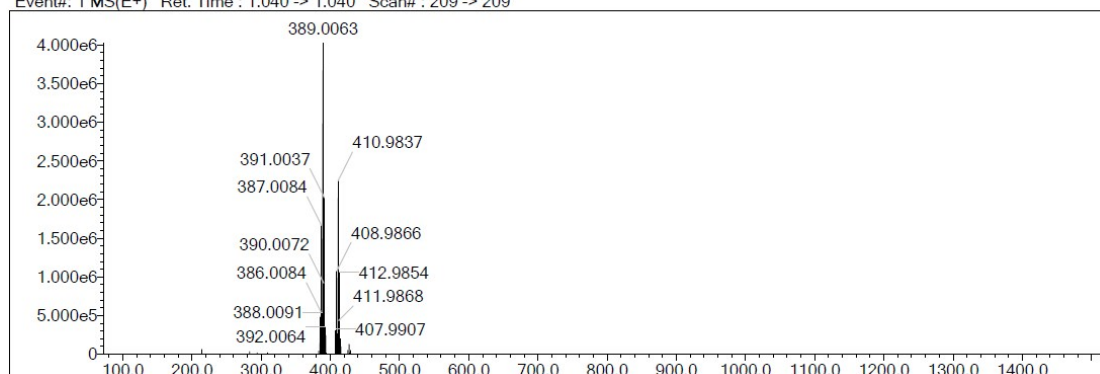

Measured region for 389.0063 m/z

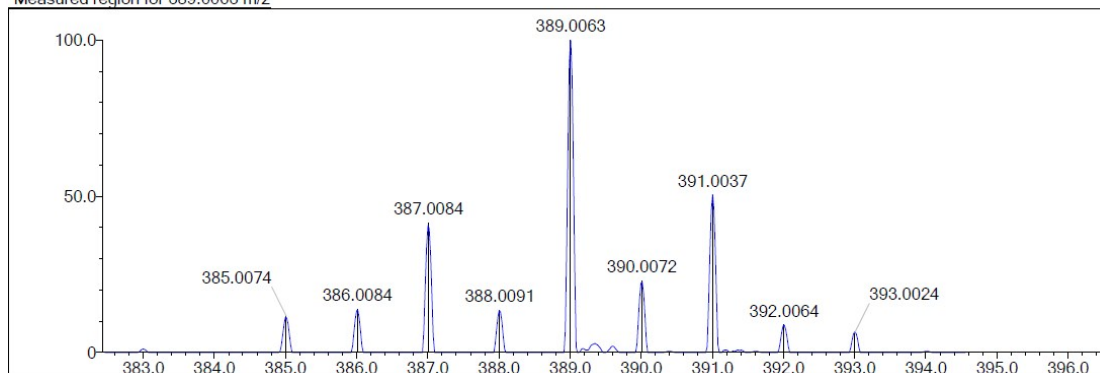

| Rank | Score | Formula (M)      | Ion                | Meas. m/z | Pred. m/z | Df. (mDa) | Df. (ppm) | Iso   | DBE  |
|------|-------|------------------|--------------------|-----------|-----------|-----------|-----------|-------|------|
| 1    | 87.47 | C17 H13 N4 Cl Se | [M+H] <sup>+</sup> | 389.0063  | 389.0065  | -0.2      | -0.51     | 87.47 | 13.0 |

5d

Event#: 1 MS(E+) Ret. Time : 1.062 -> 1.062 Scan#: 213 -> 213

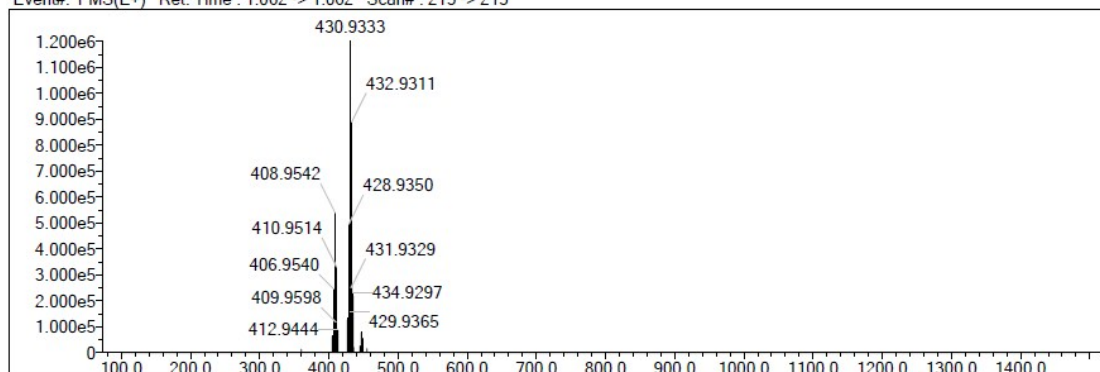

Measured region for 430.9333 m/z

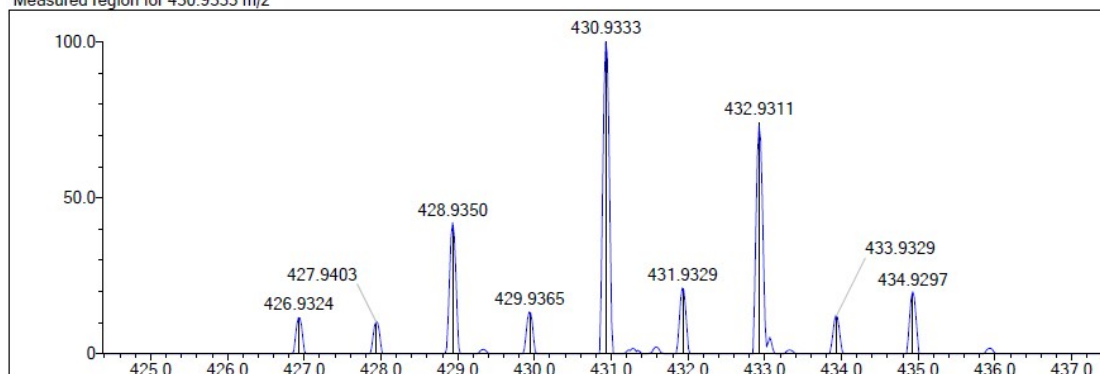

| Rank | Score | Formula (M)       | Ion                 | Meas. m/z | Pred. m/z | Df. (mDa) | Df. (ppm) | Iso   | DBE  |
|------|-------|-------------------|---------------------|-----------|-----------|-----------|-----------|-------|------|
| 3    | 89.62 | C16 H10 N4 Cl2 Se | [M+Na] <sup>+</sup> | 430.9333  | 430.9336  | -0.3      | -0.70     | 89.62 | 13.0 |

5f

Event#: 1 MS(E+) Ret. Time : 0.977 -> 0.977 Scan#: 196 -> 196

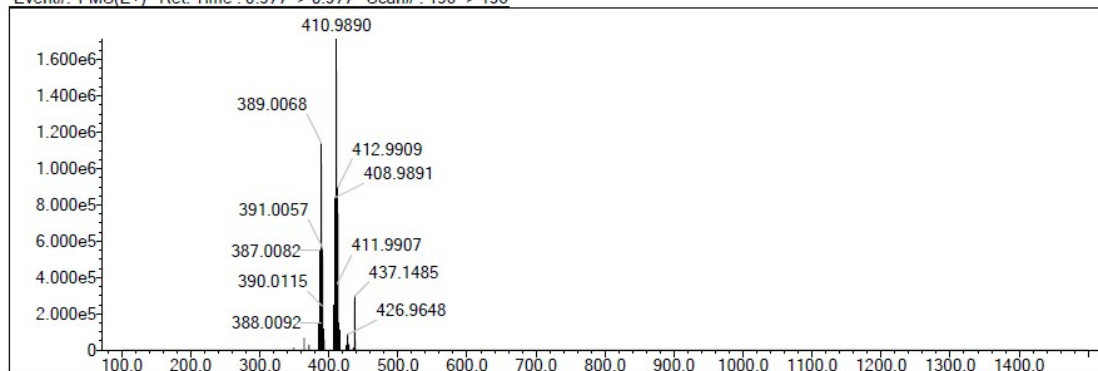

Measured region for 410.9890 m/z

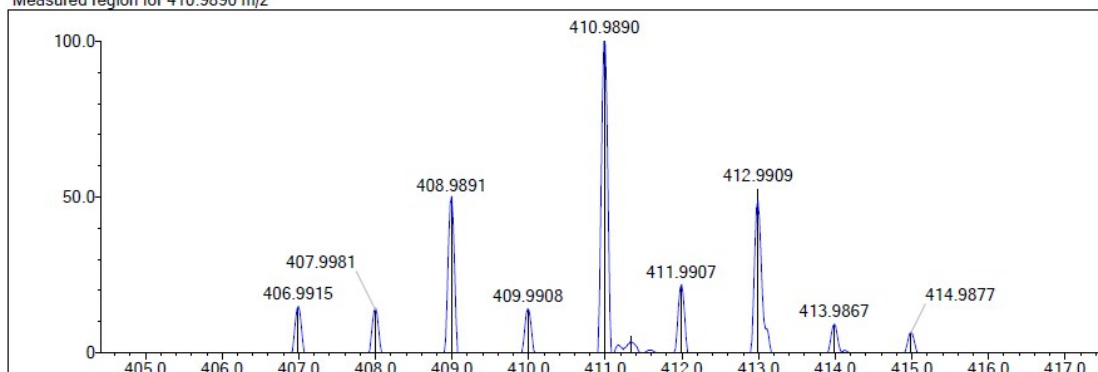

| Rank | Score | Formula (M)      | Ion                 | Meas. m/z | Pred. m/z | Df. (mDa) | Df. (ppm) | Iso    | DBE  |
|------|-------|------------------|---------------------|-----------|-----------|-----------|-----------|--------|------|
| 1    | 98.85 | C17 H13 N4 Cl Se | [M+Na] <sup>+</sup> | 410.9890  | 410.9884  | 0.6       | 1.46      | 100.00 | 13.0 |

6a

Event#: 1 MS(E+) Ret. Time : 1.187 -> 1.187 Scan#: 238 -> 238

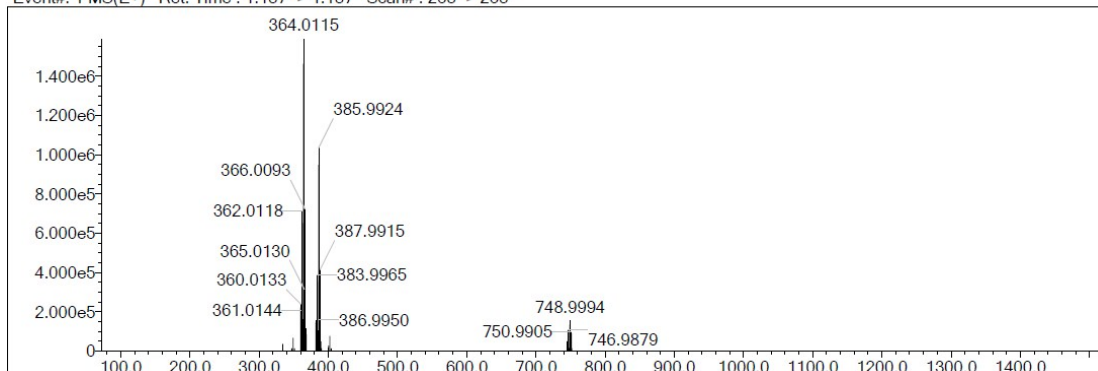

Measured region for 364.0115 m/z

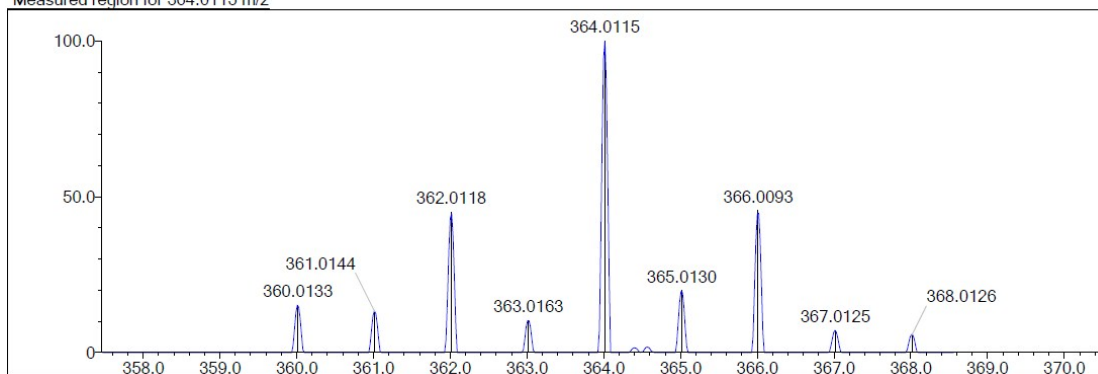

| Rank | Score  | Formula (M)      | Ion                | Meas. m/z | Pred. m/z | Df. (mDa) | Df. (ppm) | Iso    | DBE  |
|------|--------|------------------|--------------------|-----------|-----------|-----------|-----------|--------|------|
| 1    | 100.00 | C16 H14 N3 Cl Se | [M+H] <sup>+</sup> | 364.0115  | 364.0112  | 0.3       | 0.82      | 100.00 | 11.0 |

6b

Event#: 1 MS(E+) Ret. Time : 1.277 -> 1.277 Scan#: 256 -> 256

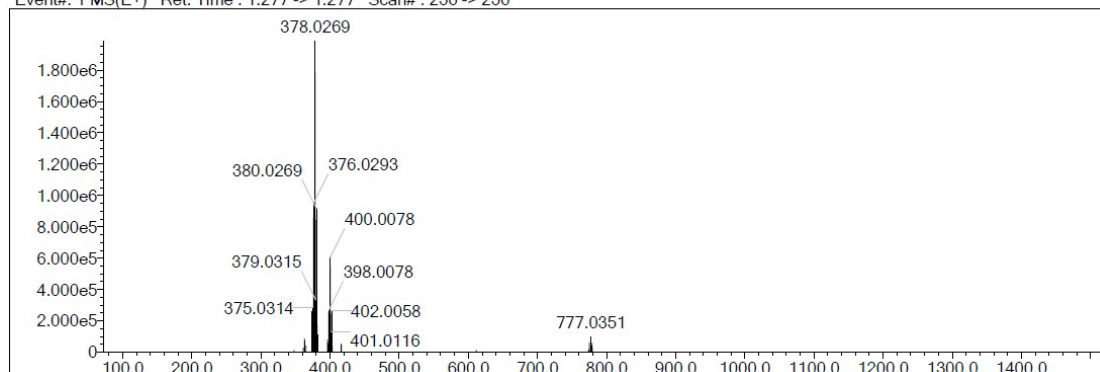

Measured region for 378.0269 m/z

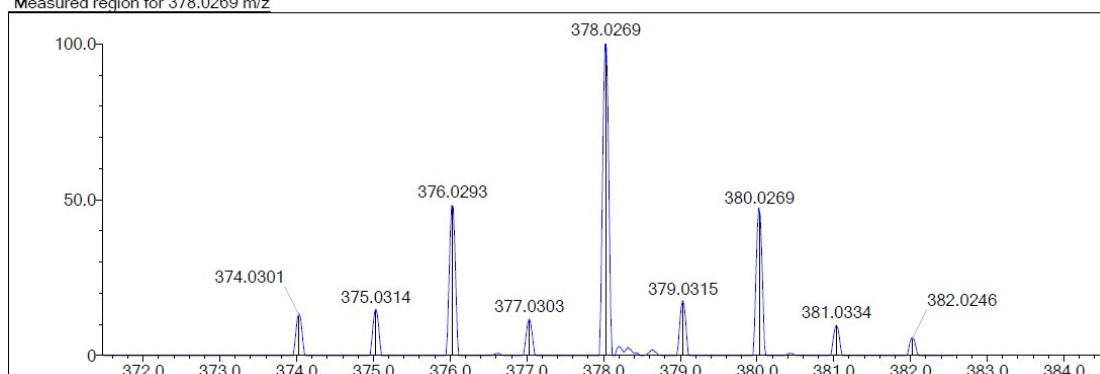

| Rank | Score  | Formula (M)      | Ion                | Meas. m/z | Pred. m/z | Df. (mDa) | Df. (ppm) | Iso    | DBE  |
|------|--------|------------------|--------------------|-----------|-----------|-----------|-----------|--------|------|
| 1    | 100.00 | C17 H16 N3 Cl Se | [M+H] <sup>+</sup> | 378.0269  | 378.0269  | 0.0       | 0.00      | 100.00 | 11.0 |

6c

Event#: 1 MS(E+) Ret. Time : 1.747 -> 1.747 Scan#: 263 -> 263

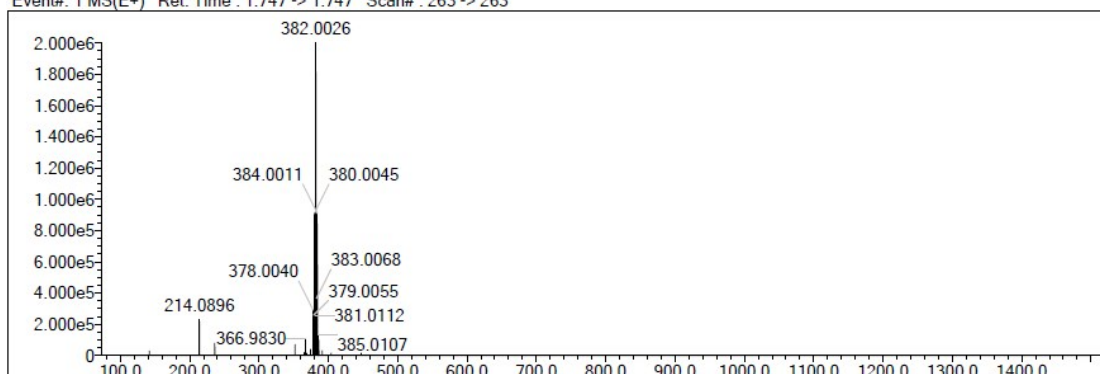

Measured region for 382.0026 m/z

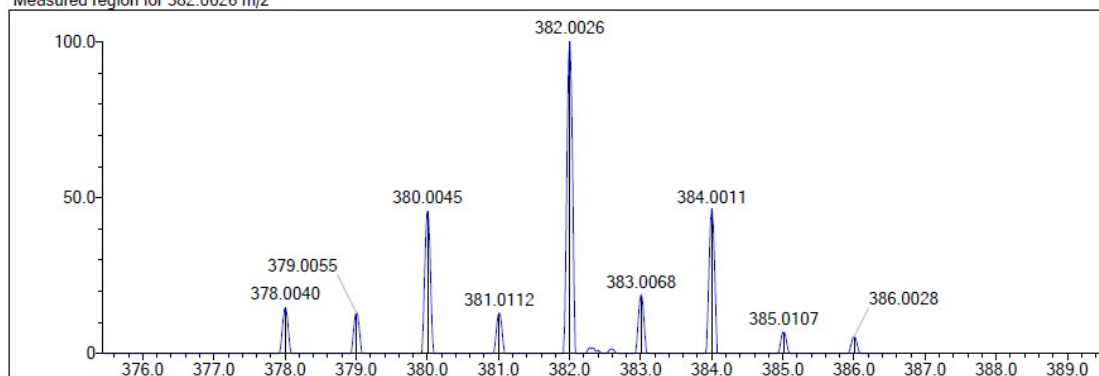

| Rank | Score | Formula (M)        | Ion                | Meas. m/z | Pred. m/z | Df. (mDa) | Df. (ppm) | Iso    | DBE  |
|------|-------|--------------------|--------------------|-----------|-----------|-----------|-----------|--------|------|
| 1    | 97.28 | C16 H13 N3 F Cl Se | [M+H] <sup>+</sup> | 382.0026  | 382.0018  | 0.8       | 2.09      | 100.00 | 11.0 |

6d

Event#: 1 MS(E+) Ret. Time : 1.262 -> 1.262 Scan#: 253 -> 253

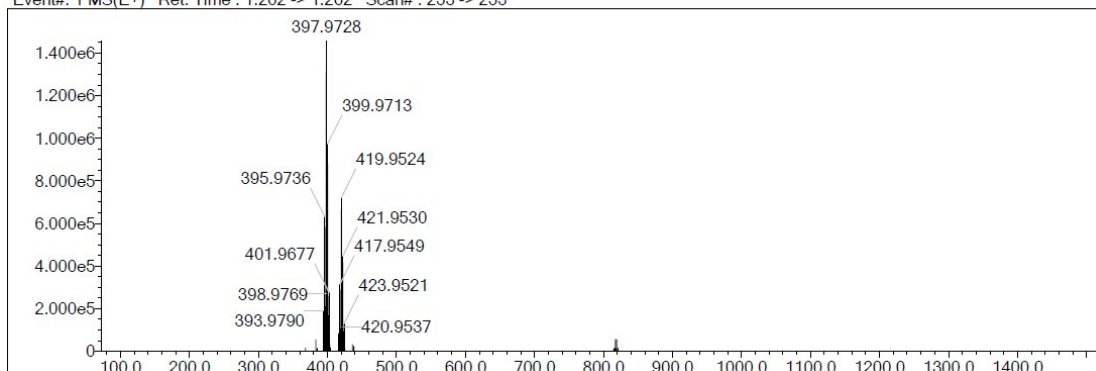

Measured region for 397.9728 m/z

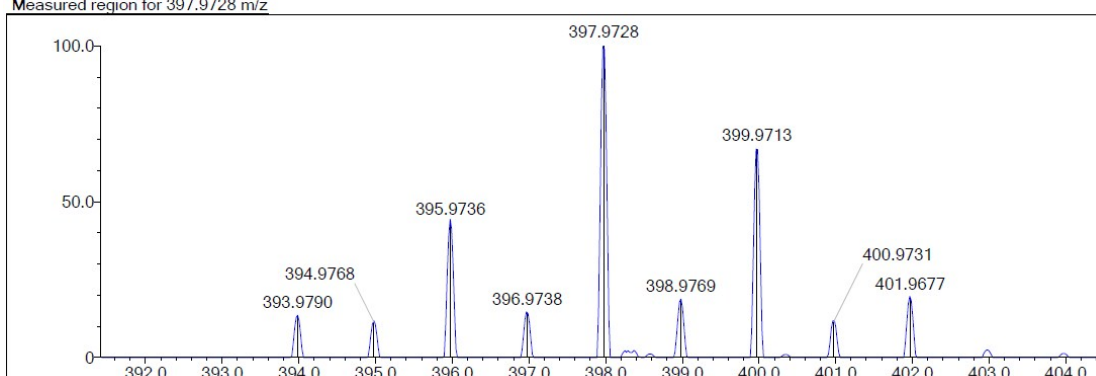

| Rank | Score | Formula (M)       | Ion                | Meas. m/z | Pred. m/z | Df. (mDa) | Df. (ppm) | Iso    | DBE  |
|------|-------|-------------------|--------------------|-----------|-----------|-----------|-----------|--------|------|
| 3    | 97.47 | C16 H13 N3 Cl2 Se | [M+H] <sup>+</sup> | 397.9728  | 397.9720  | 0.8       | 2.01      | 100.00 | 11.0 |

6e

Event#: 1 MS(E+) Ret. Time : 1.252 -> 1.252 Scan#: 251 -> 251

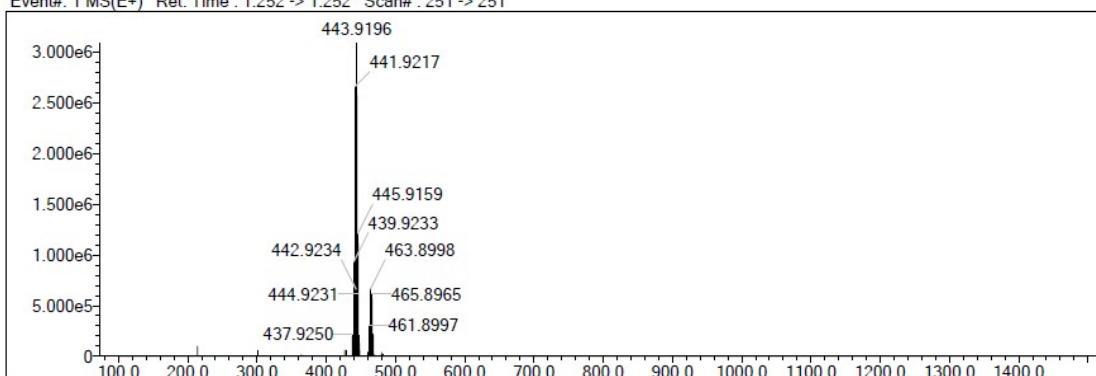



Measured region for 441.9217 m/z

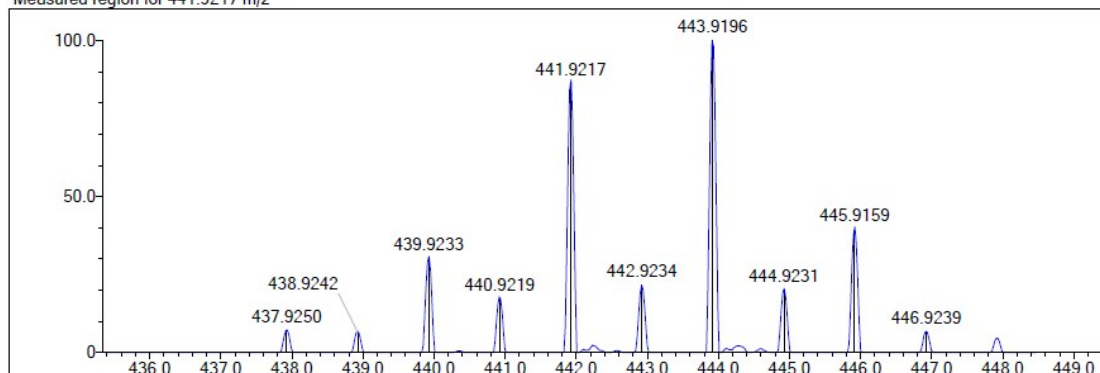

| Rank | Score | Formula (M)         | Ion                | Meas. m/z | Pred. m/z | Df. (mDa) | Df. (ppm) | Iso   | DBE  |
|------|-------|---------------------|--------------------|-----------|-----------|-----------|-----------|-------|------|
| 7    | 72.57 | C16 H13 N3 Cl Se Br | [M+H] <sup>+</sup> | 441.9217  | 441.9215  | 0.2       | 0.45      | 72.57 | 11.0 |

6f

Event#: 1 MS(E<sup>+</sup>) Ret. Time : 1.342 -> 1.342 Scan#: 269 -> 269

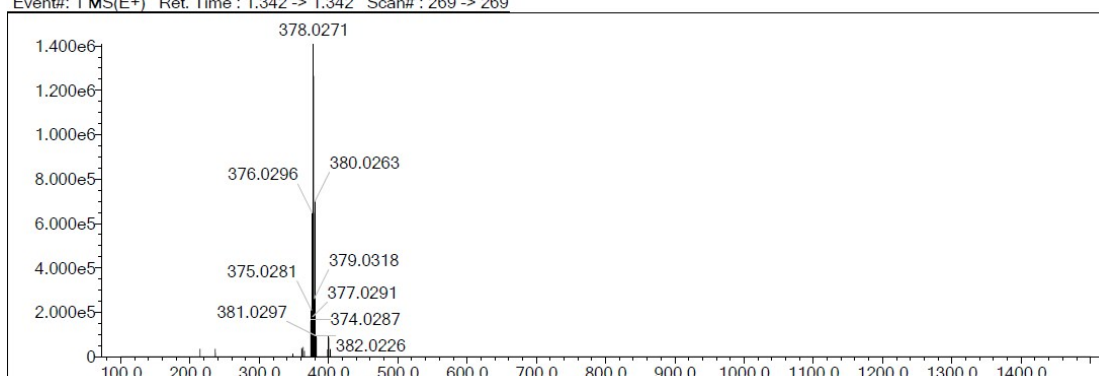

Measured region for 378.0271 m/z

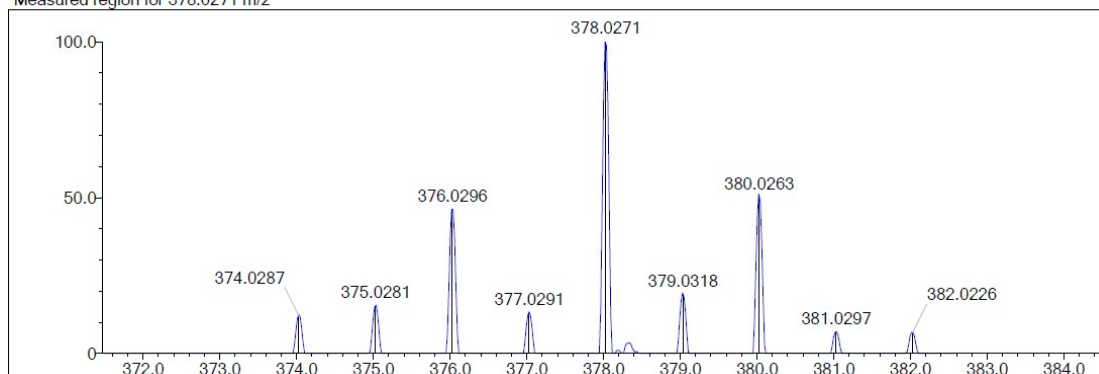

| Rank | Score | Formula (M)      | Ion                | Meas. m/z | Pred. m/z | Df. (mDa) | Df. (ppm) | Iso   | DBE  |
|------|-------|------------------|--------------------|-----------|-----------|-----------|-----------|-------|------|
| 1    | 94.09 | C17 H16 N3 Cl Se | [M+H] <sup>+</sup> | 378.0271  | 378.0269  | 0.2       | 0.53      | 94.09 | 11.0 |

6g

Event#: 1 MS(E+) Ret. Time : 1.507 -> 1.507 Scan#: 302 -> 302

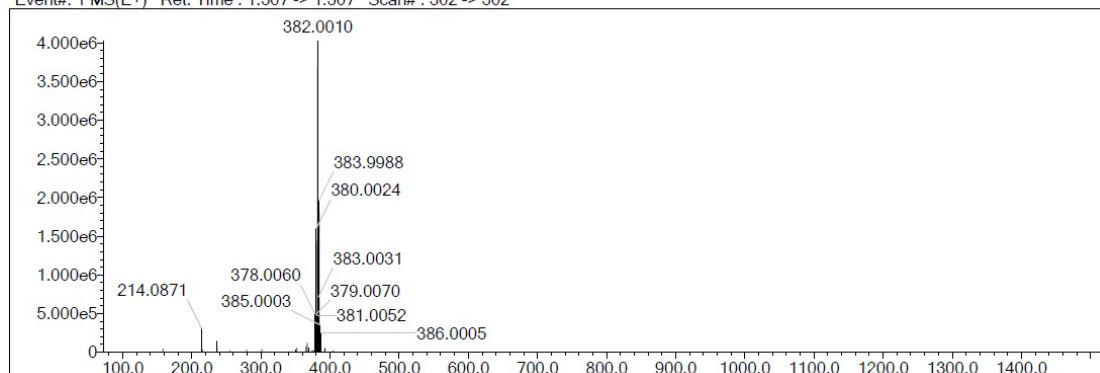

Measured region for 382.0010 m/z

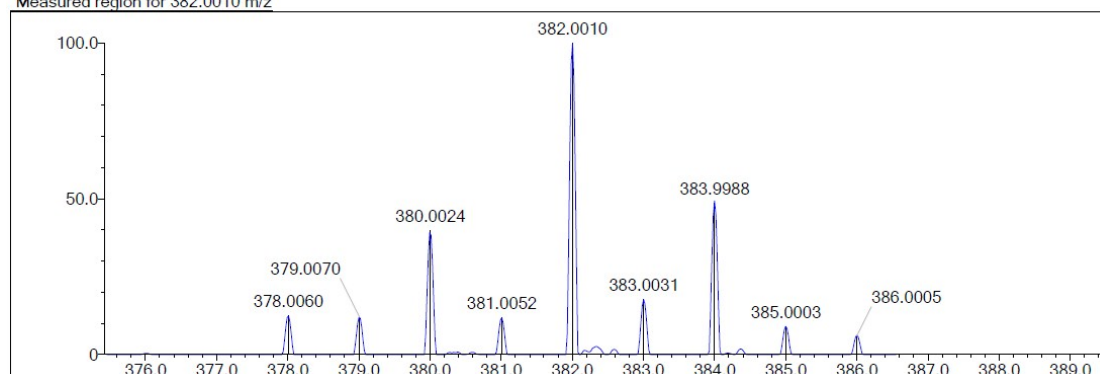

| Rank | Score | Formula (M)        | Ion                | Meas. m/z | Pred. m/z | Df. (mDa) | Df. (ppm) | Iso   | DBE  |
|------|-------|--------------------|--------------------|-----------|-----------|-----------|-----------|-------|------|
| 1    | 82.86 | C16 H13 N3 F Cl Se | [M+H] <sup>+</sup> | 382.0010  | 382.0018  | -0.8      | -2.09     | 85.18 | 11.0 |

6h

Event#: 1 MS(E+) Ret. Time : 1.302 -> 1.302 Scan#: 261 -> 261

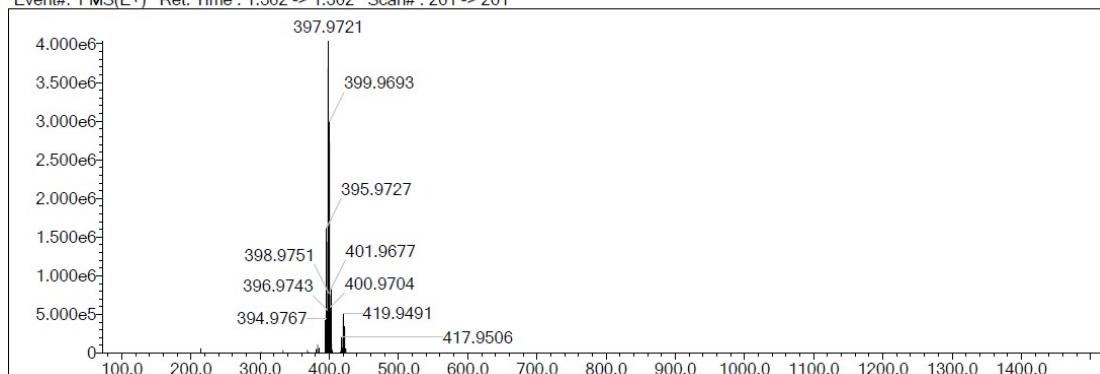

Measured region for 397.9721 m/z

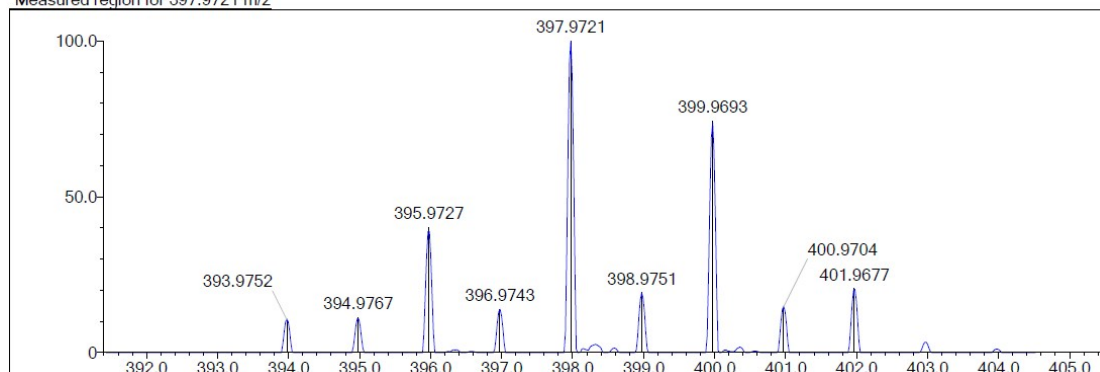

| Rank | Score | Formula (M)       | Ion                | Meas. m/z | Pred. m/z | Df. (mDa) | Df. (ppm) | Iso   | DBE  |
|------|-------|-------------------|--------------------|-----------|-----------|-----------|-----------|-------|------|
| 1    | 86.33 | C16 H13 N3 Cl2 Se | [M+H] <sup>+</sup> | 397.9721  | 397.9720  | 0.1       | 0.25      | 86.33 | 11.0 |

6i

Event#: 1 MS(E<sup>+</sup>) Ret. Time : 1.332 -> 1.332 Scan#: 267 -> 267

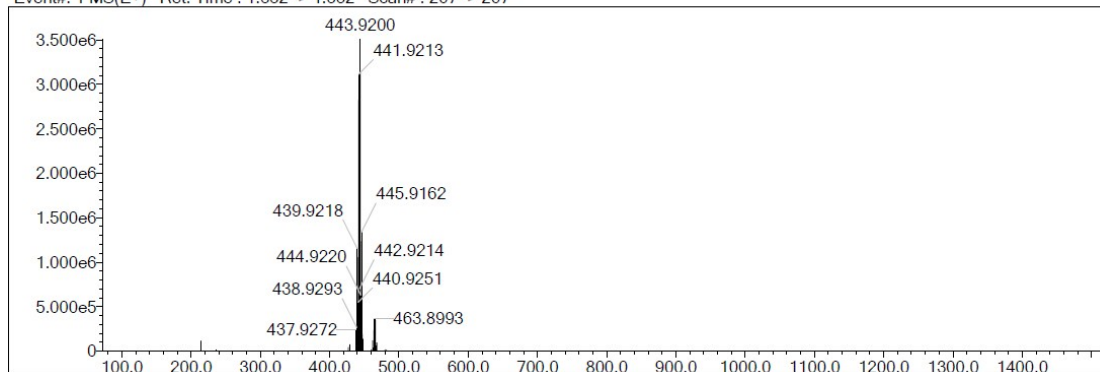

Measured region for 441.9213 m/z

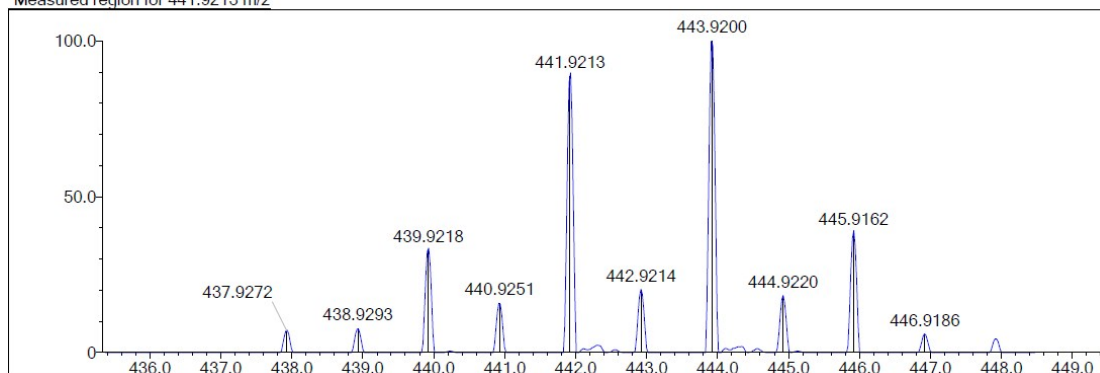

| Rank | Score | Formula (M)         | Ion                | Meas. m/z | Pred. m/z | Df. (mDa) | Df. (ppm) | Iso   | DBE  |
|------|-------|---------------------|--------------------|-----------|-----------|-----------|-----------|-------|------|
| 7    | 76.77 | C16 H13 N3 Cl Se Br | [M+H] <sup>+</sup> | 441.9213  | 441.9215  | -0.2      | -0.45     | 76.77 | 11.0 |

7a

Event#: 1 MS(E<sup>+</sup>) Ret. Time : 1.617 -> 1.617 Scan#: 324 -> 324

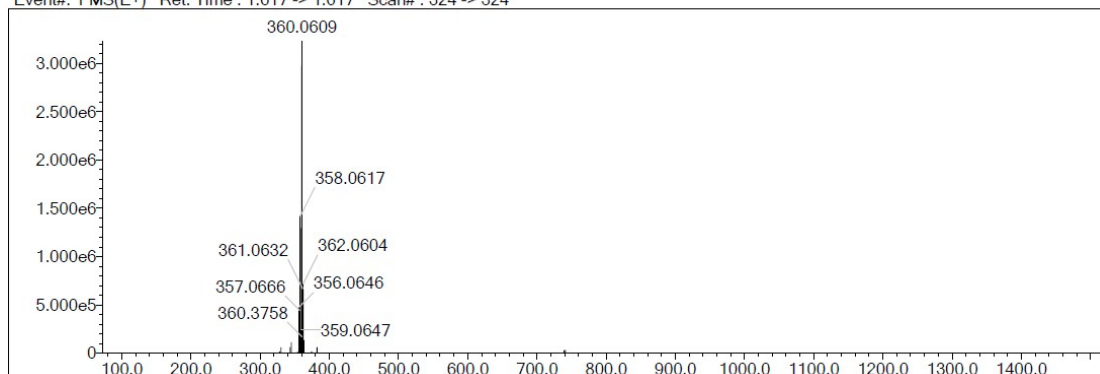

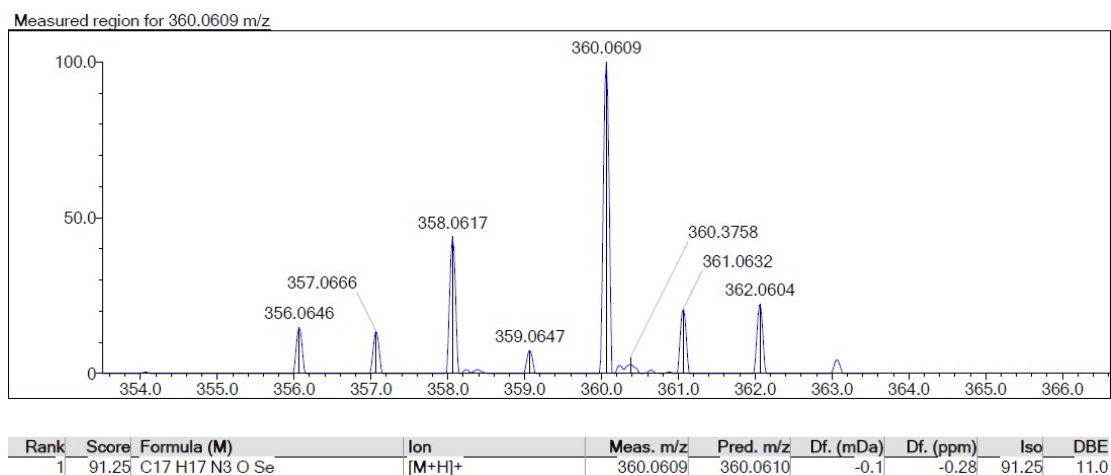

10

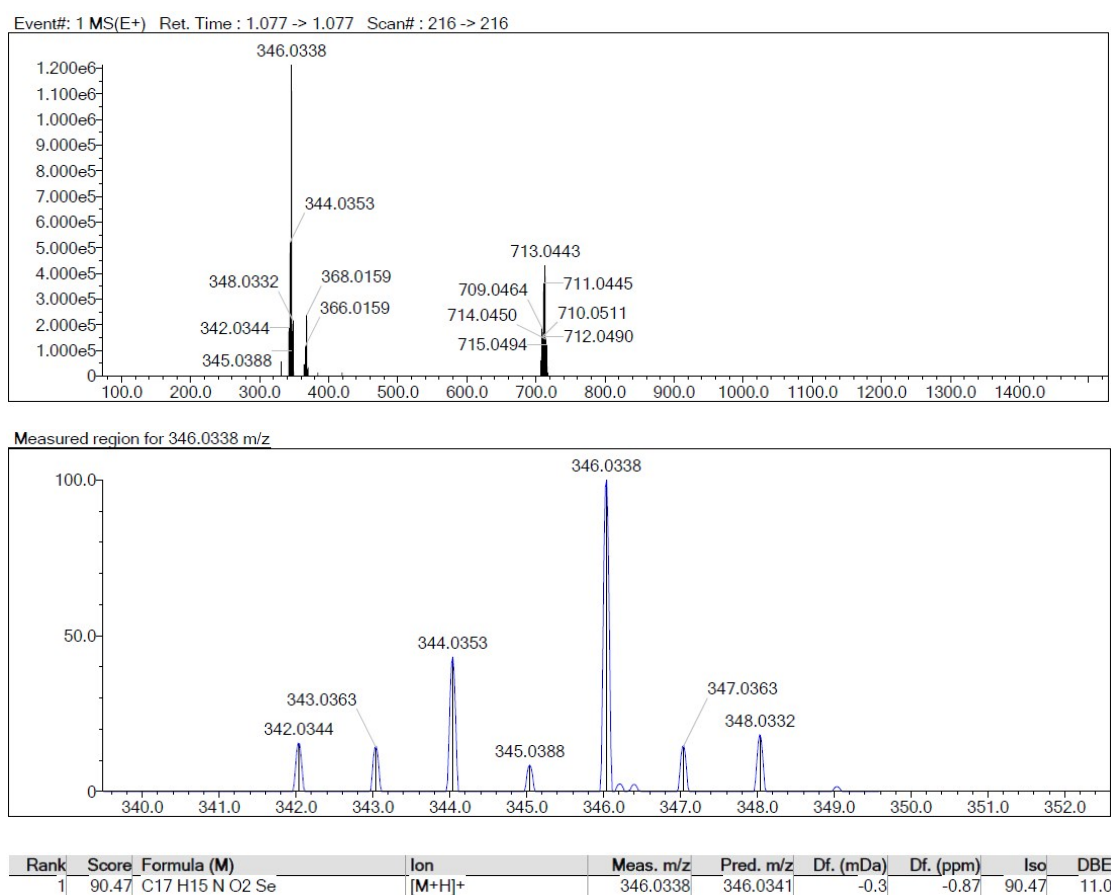

SI5. LR-MS of target compounds

MS Spectrum

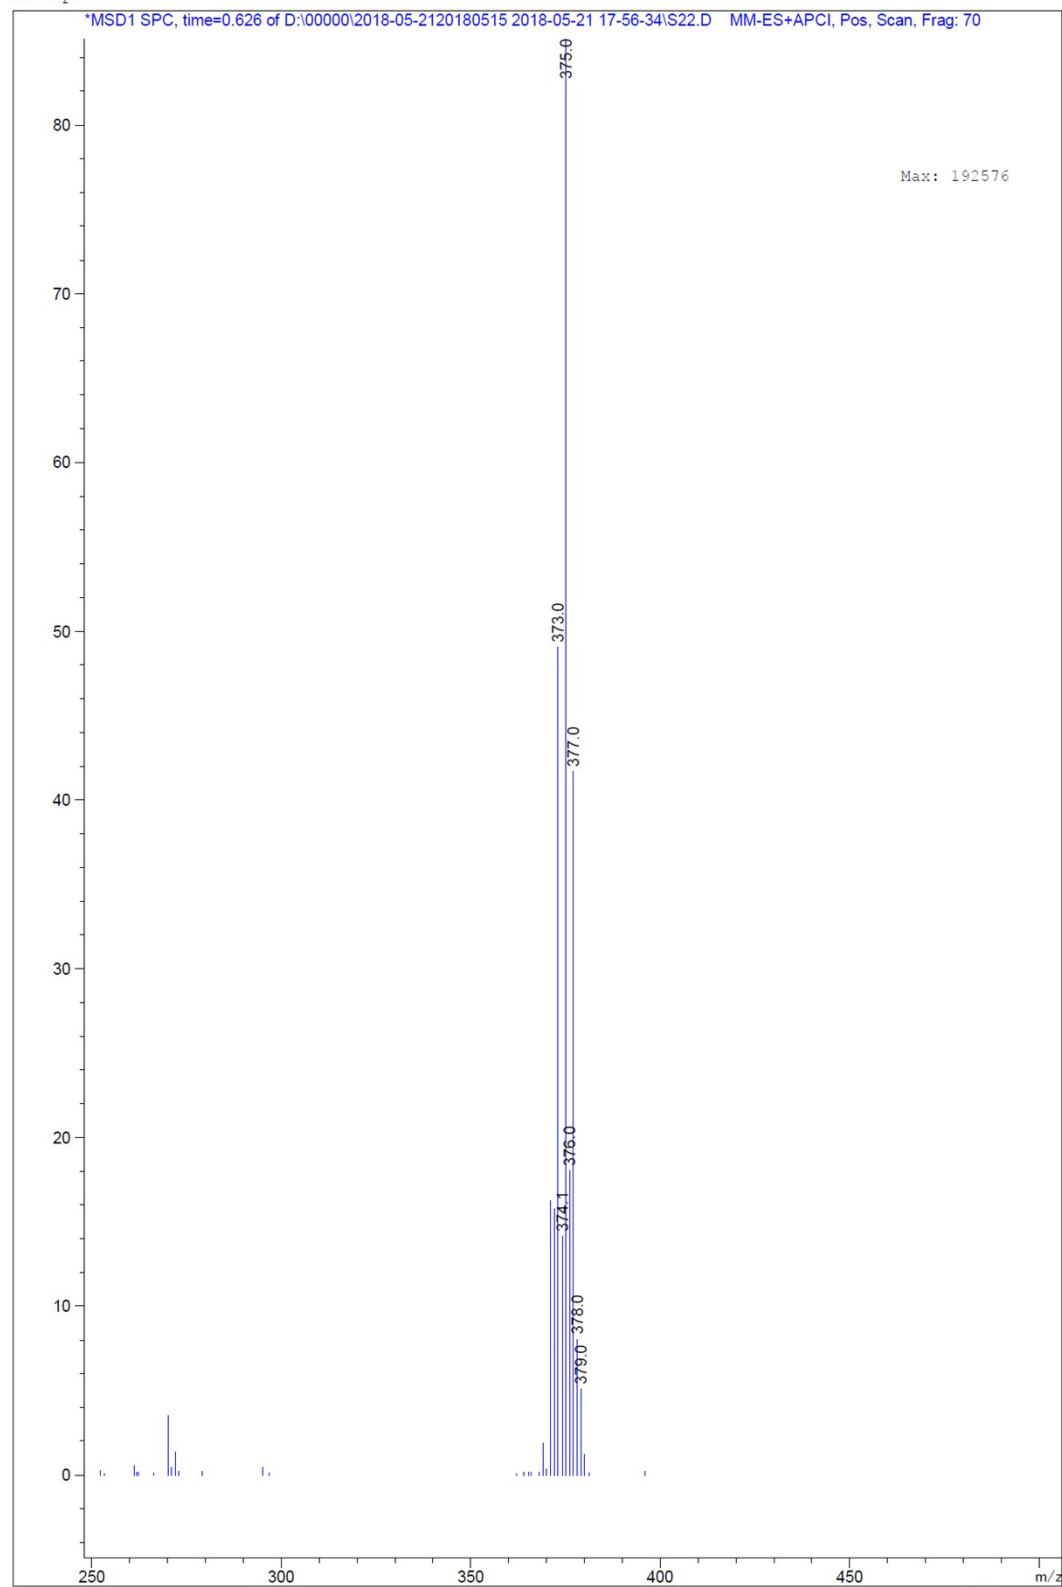

MS of compound 5a

MS Spectrum

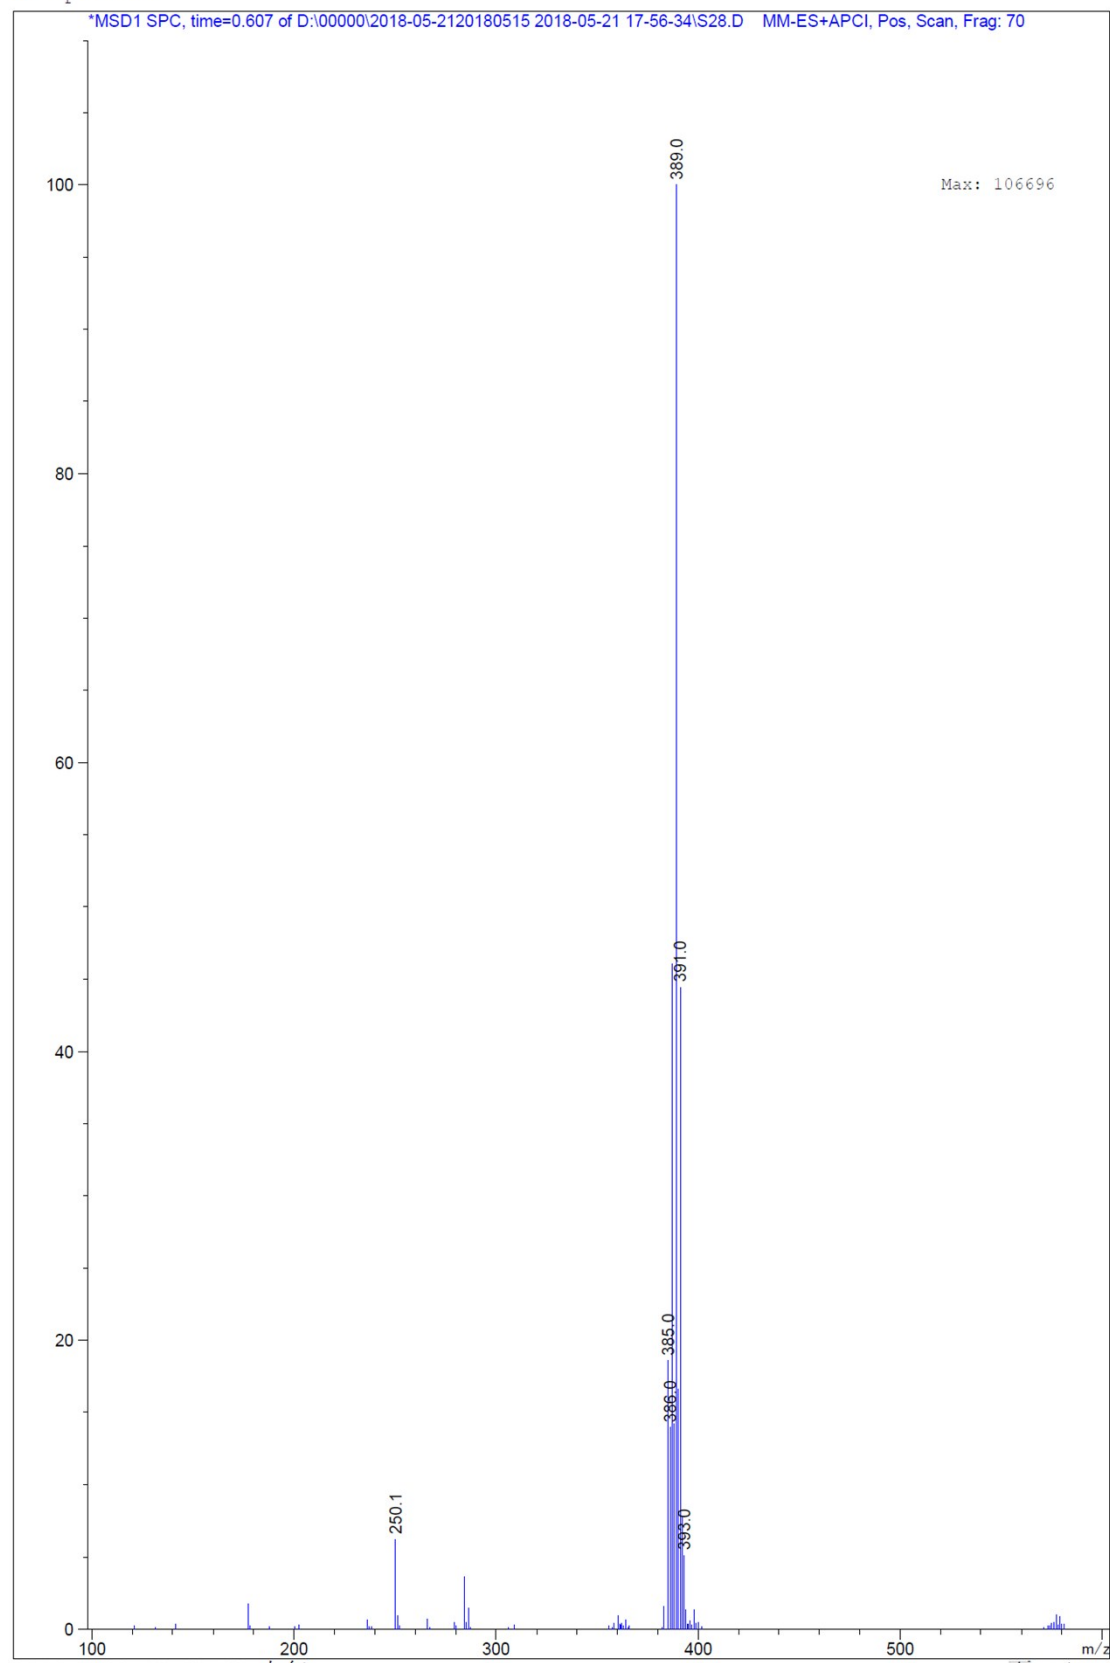

MS of compound **5b**



MS Spectrum

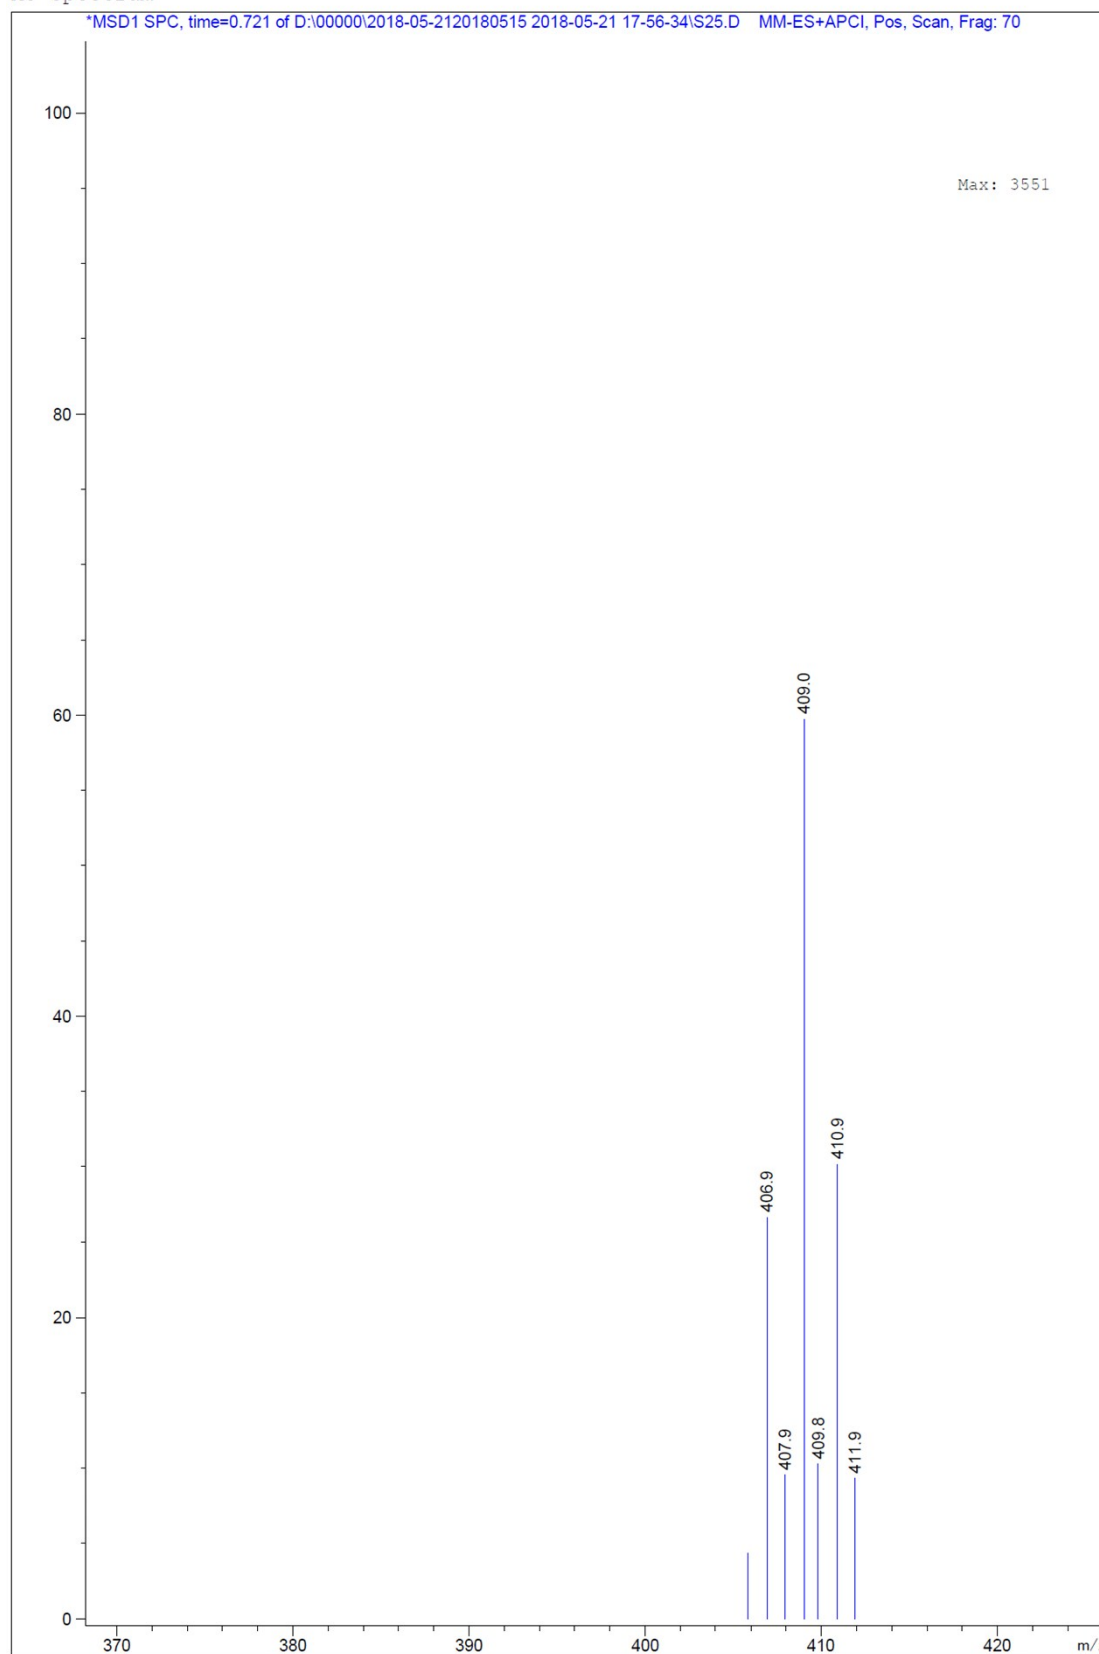

MS of compound **5d**

MS Spectrum

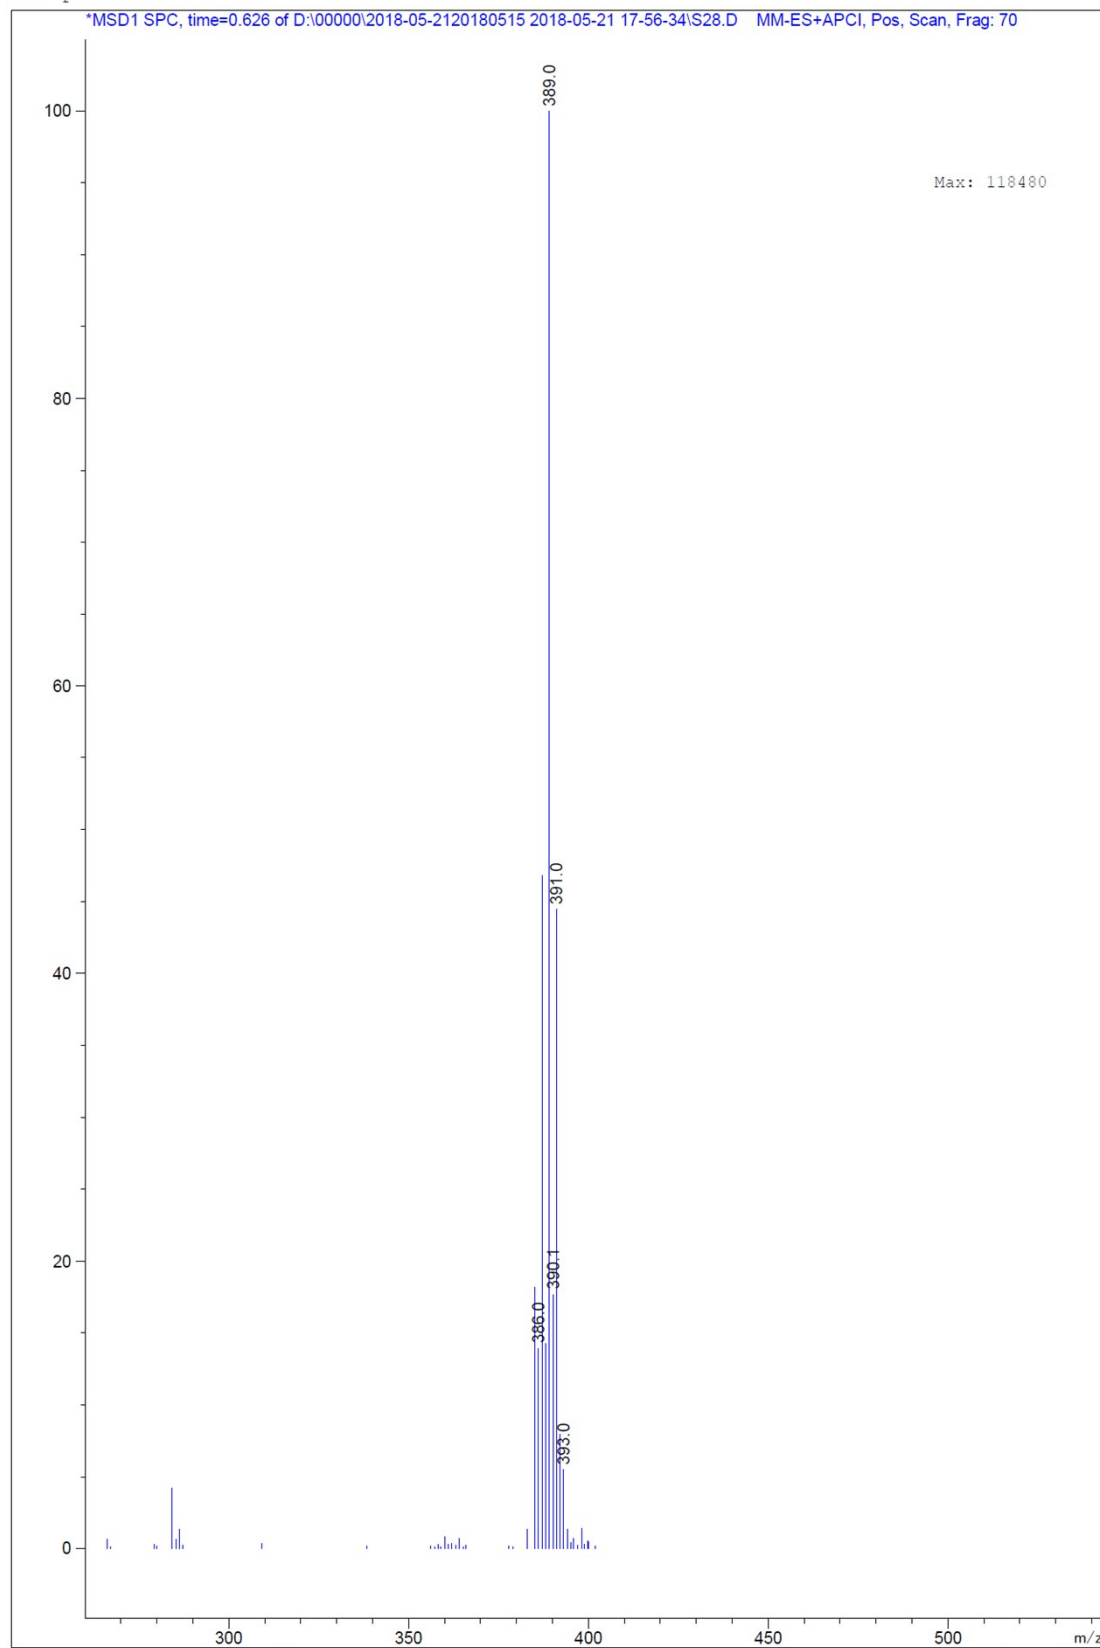

MS of compound **5f**

MS Spectrum

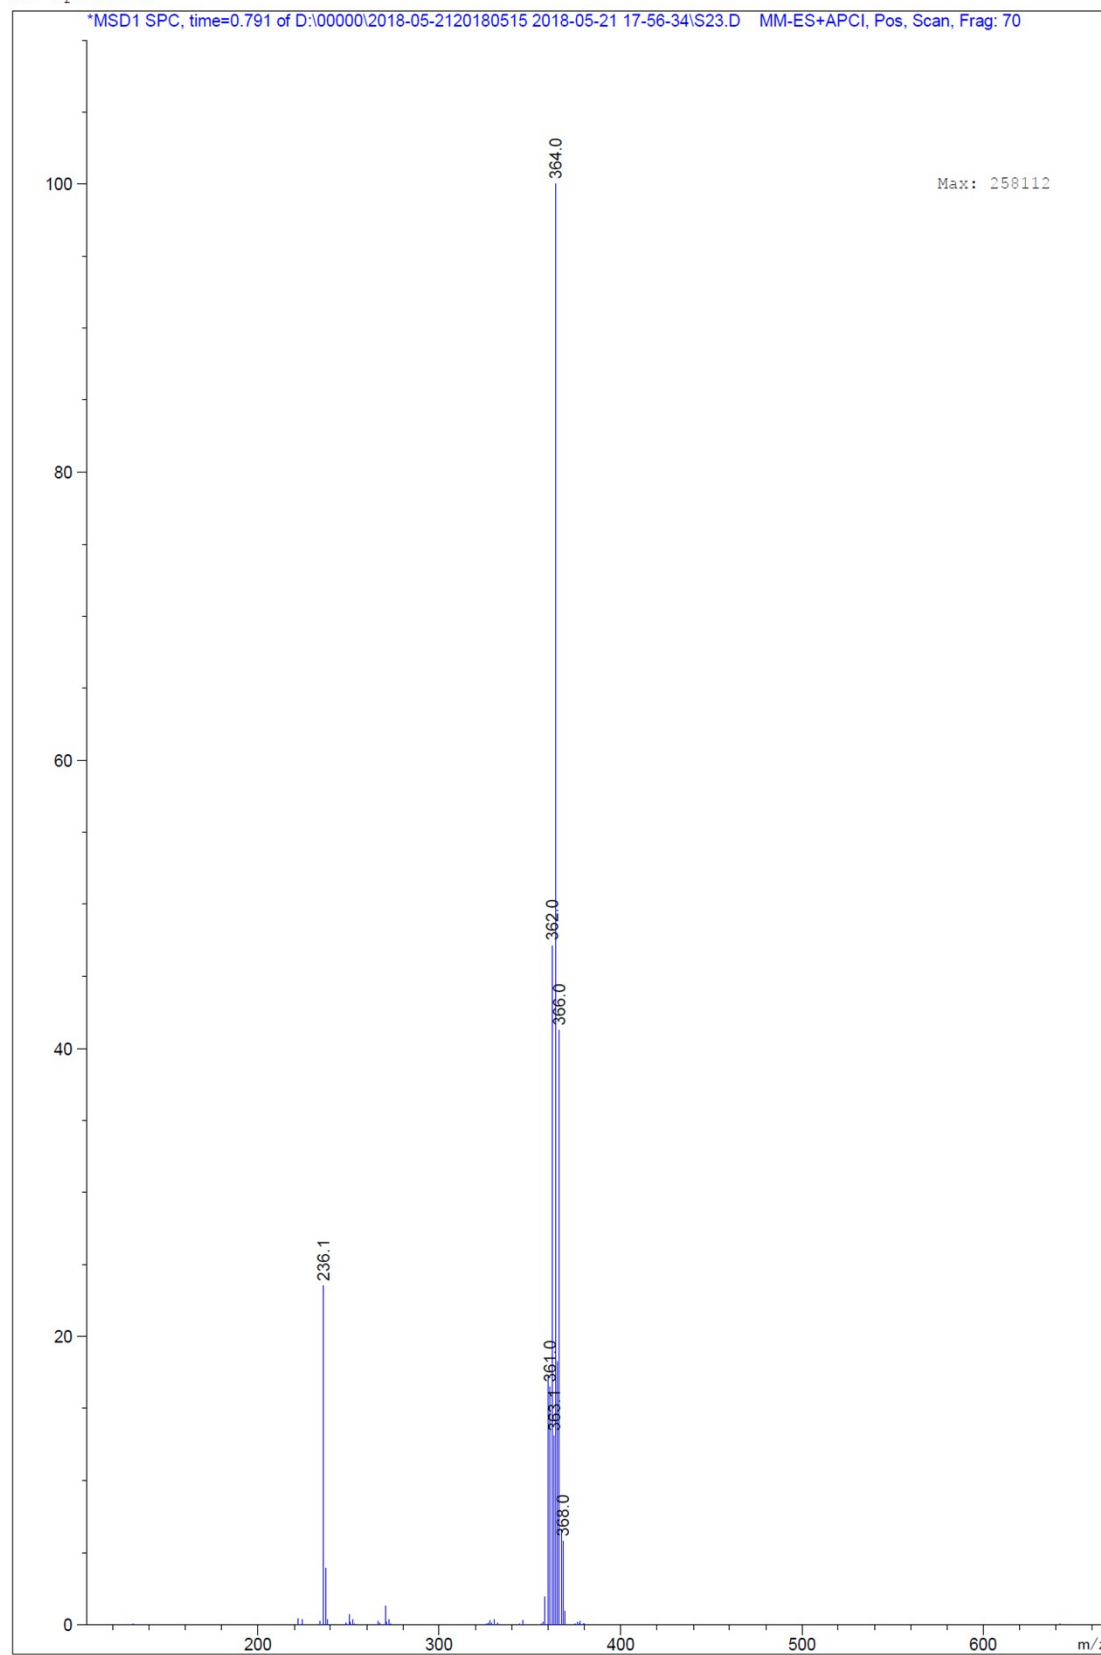

MS of compound 6a

MS Spectrum

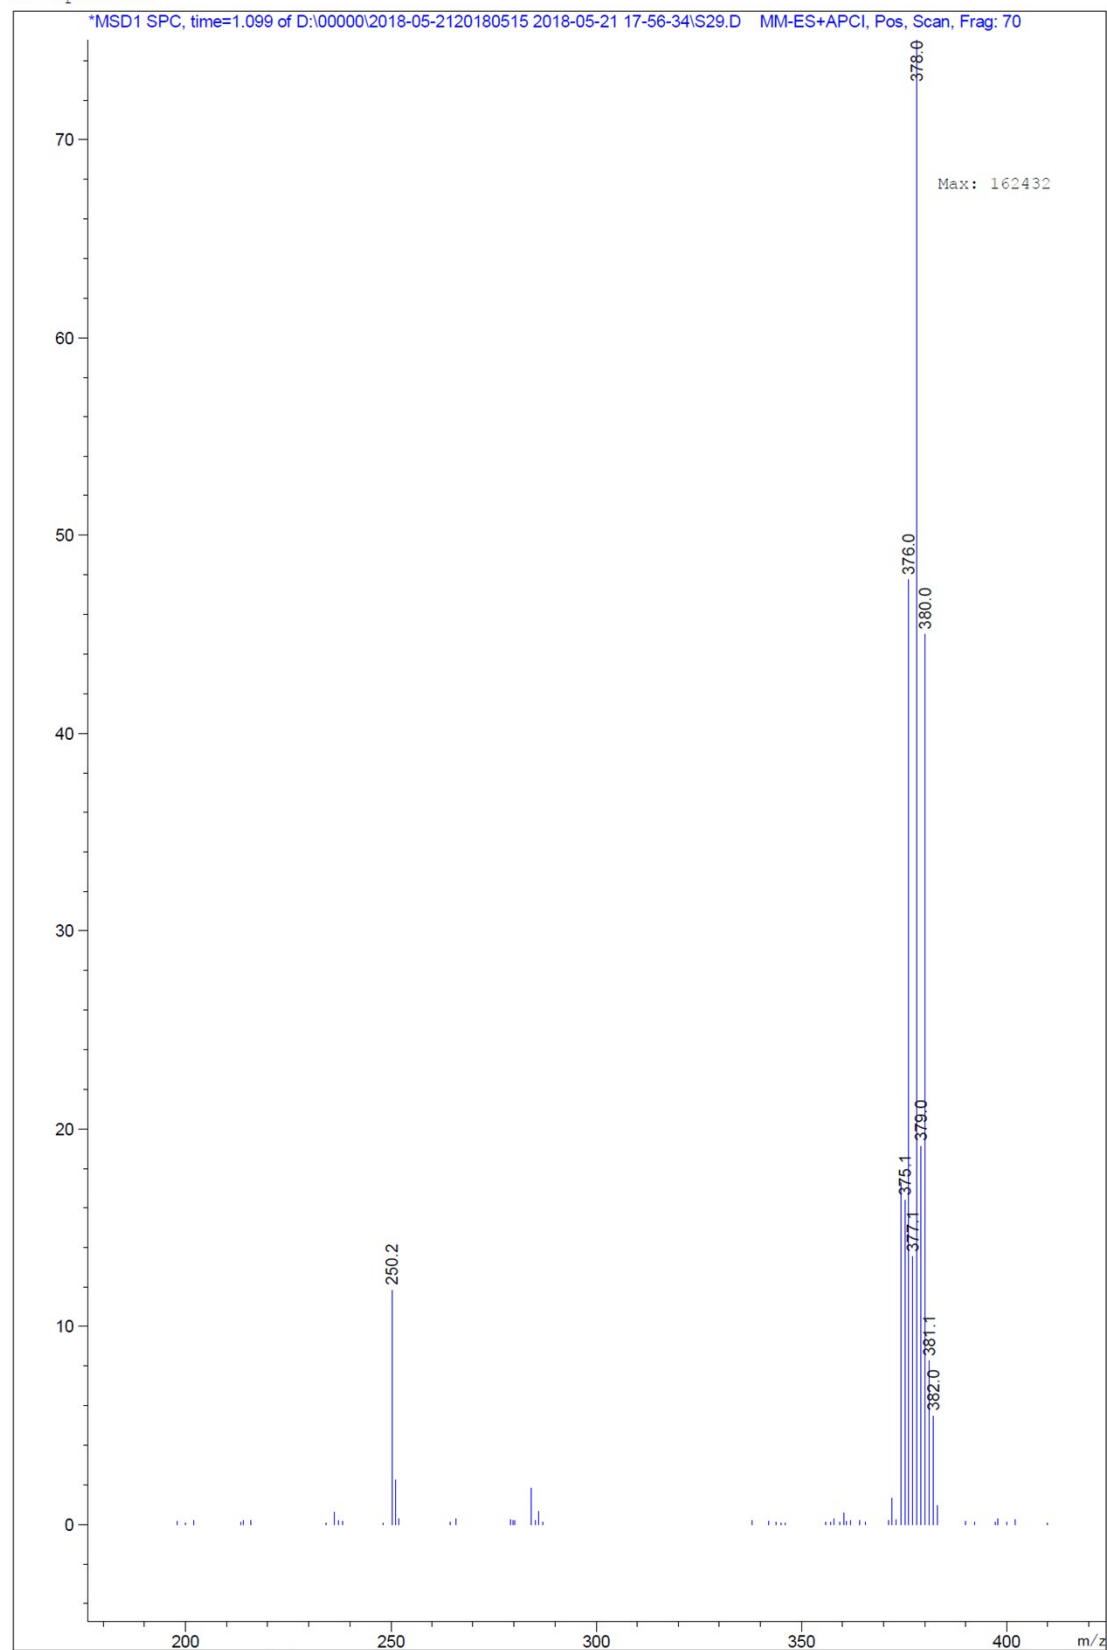

MS of compound **6b**

MS Spectrum

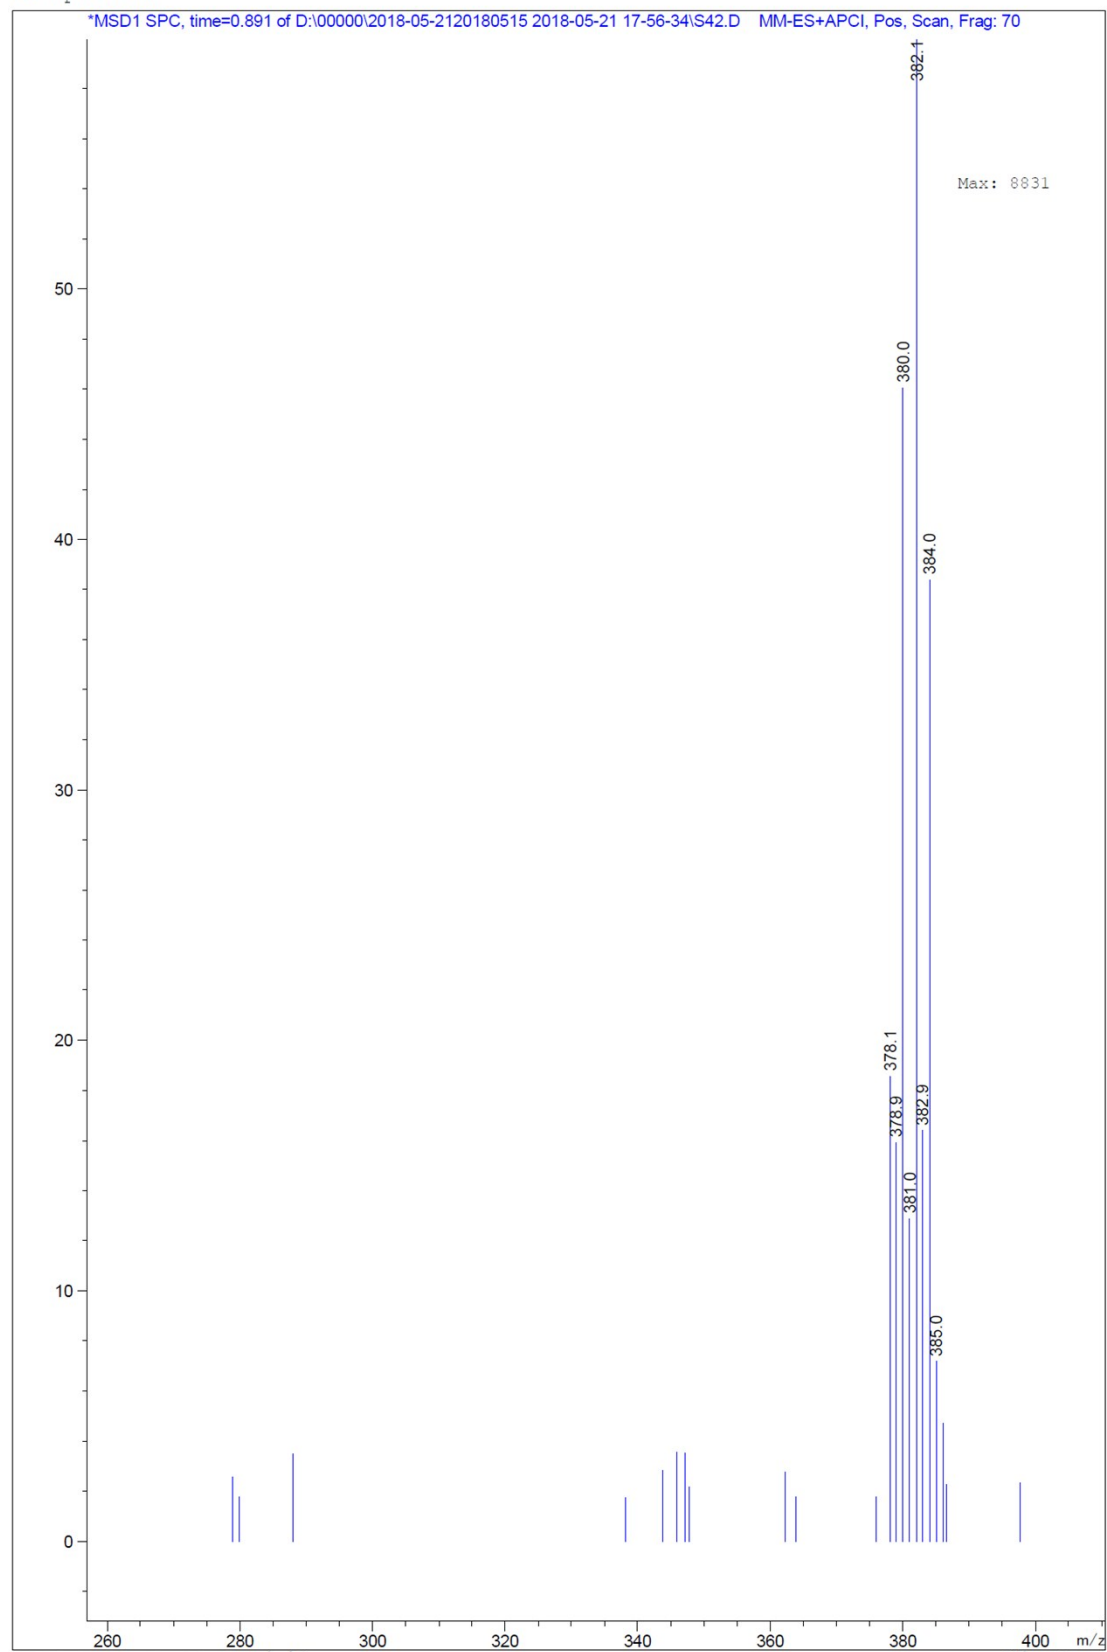

MS Spectrum

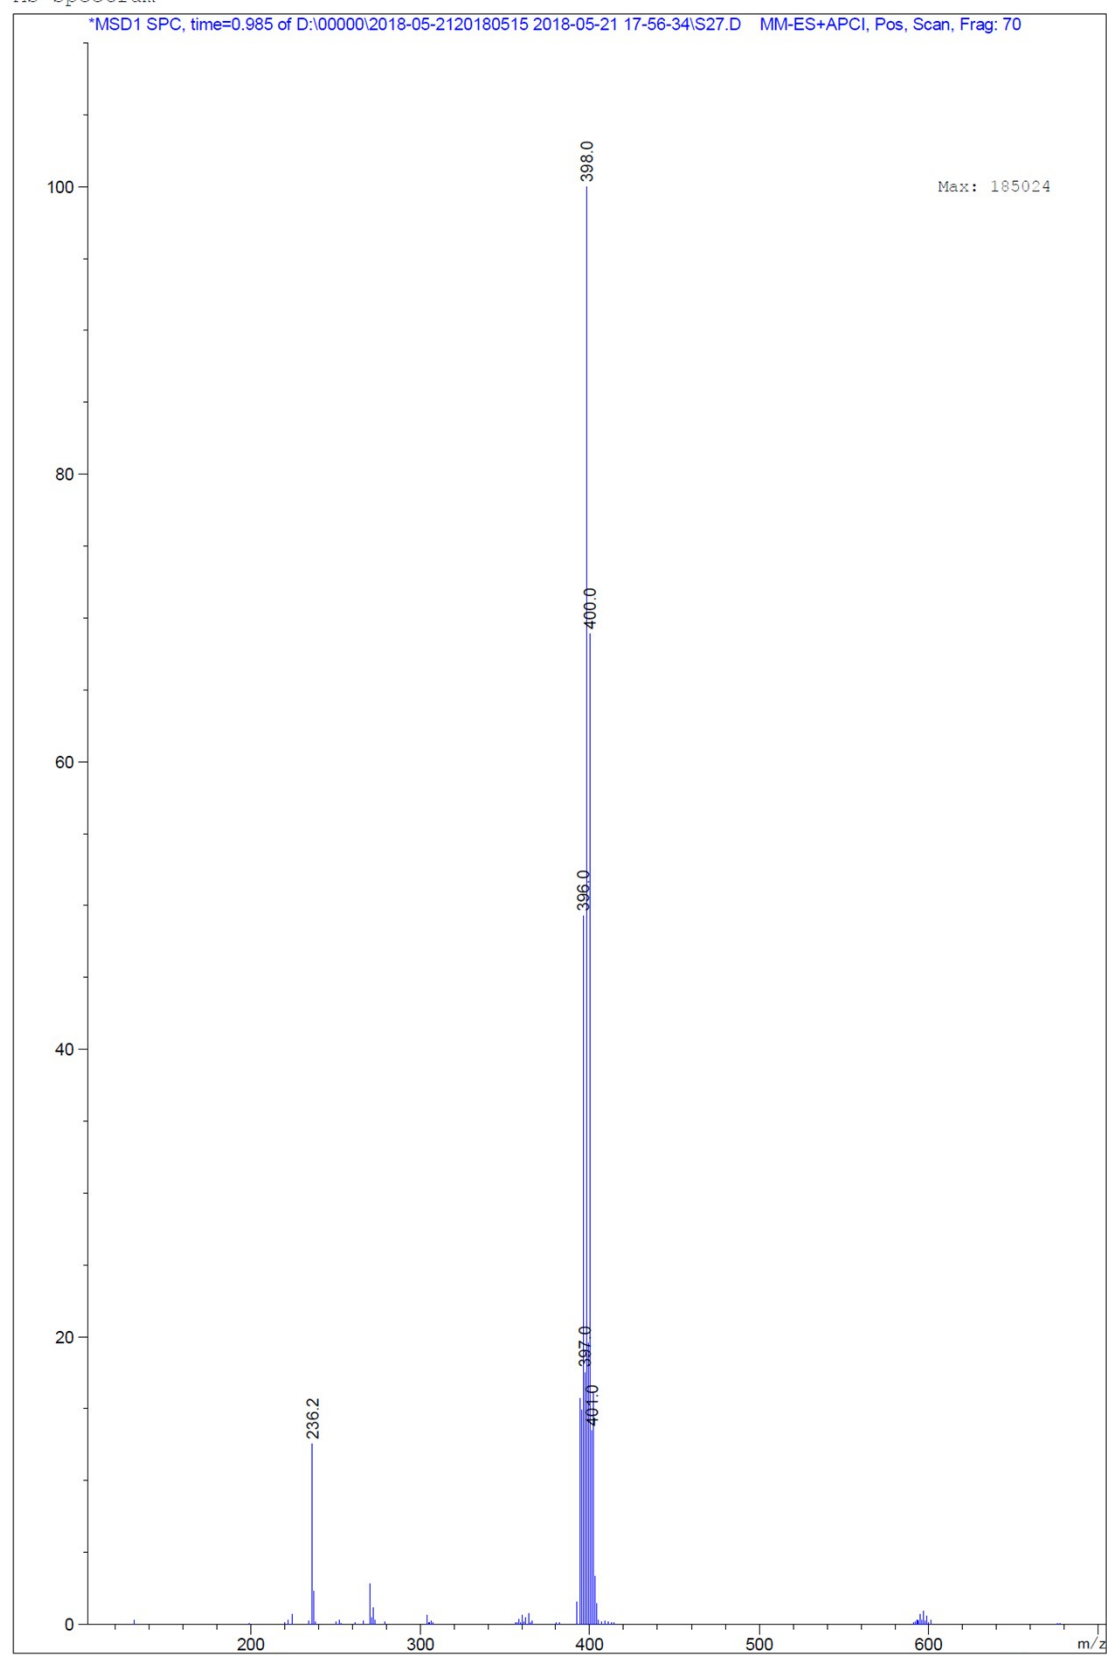

MS of compound **6d**



MS Spectrum

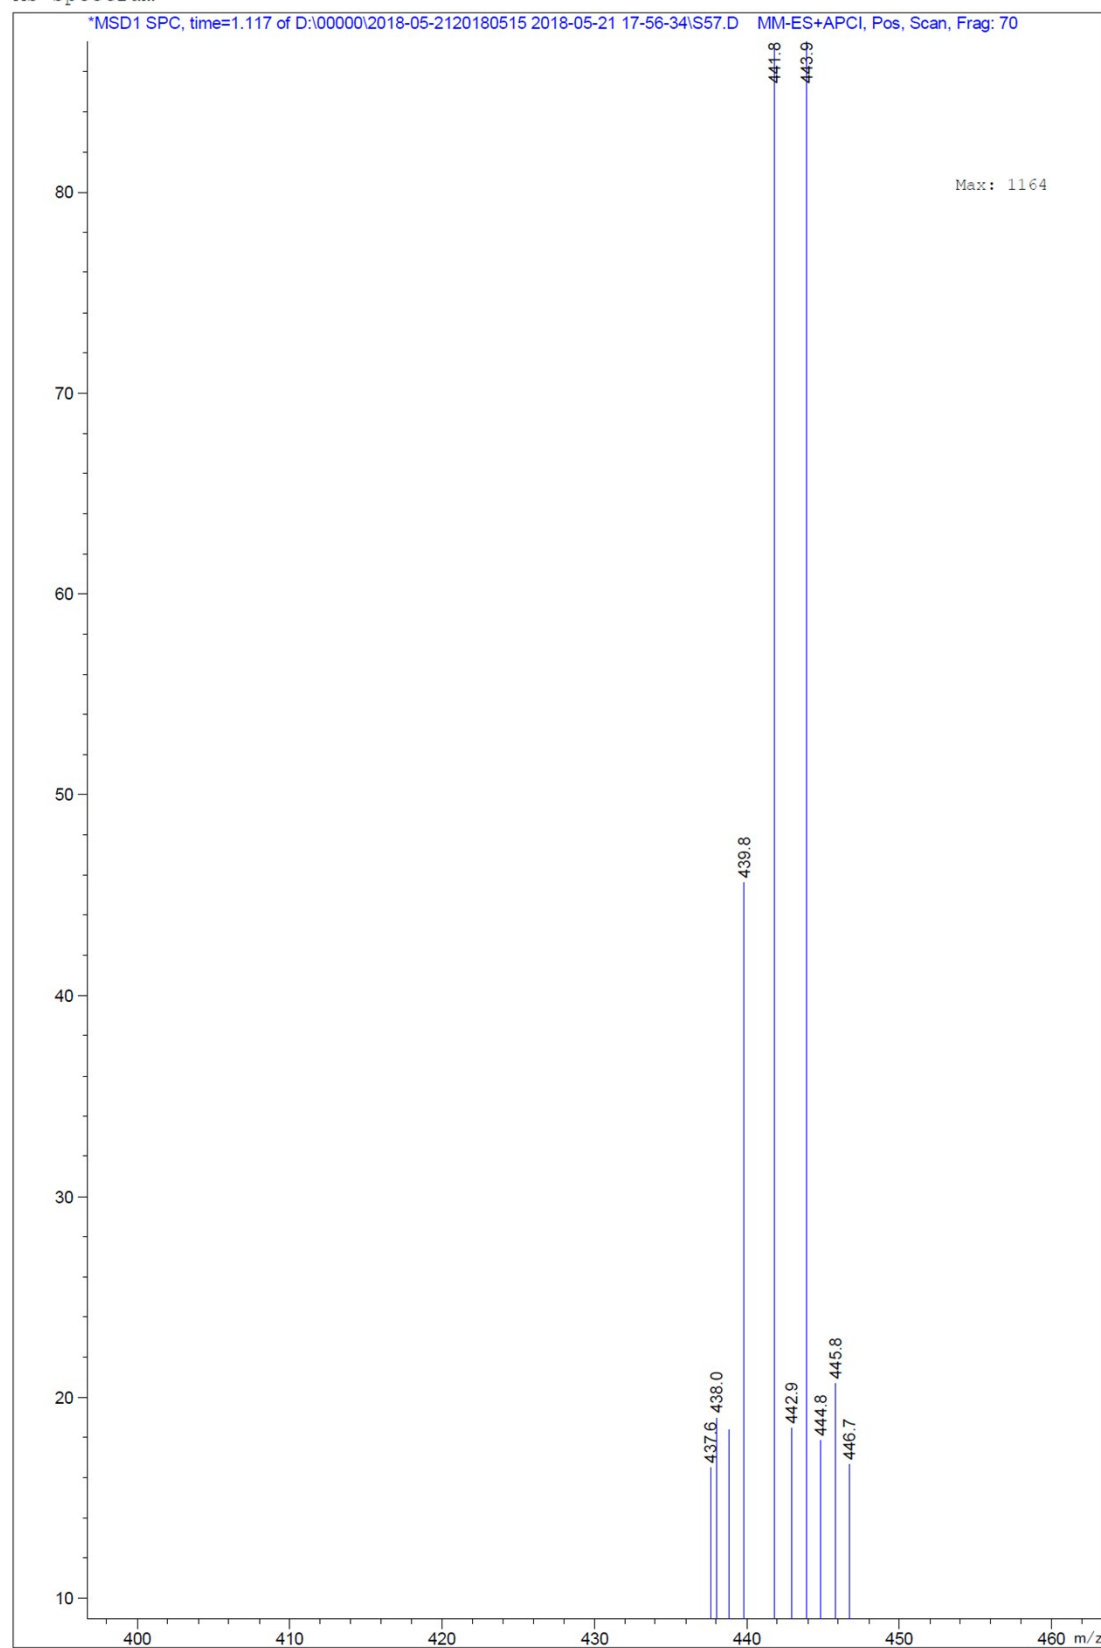

MS of compound 6e

MS Spectrum

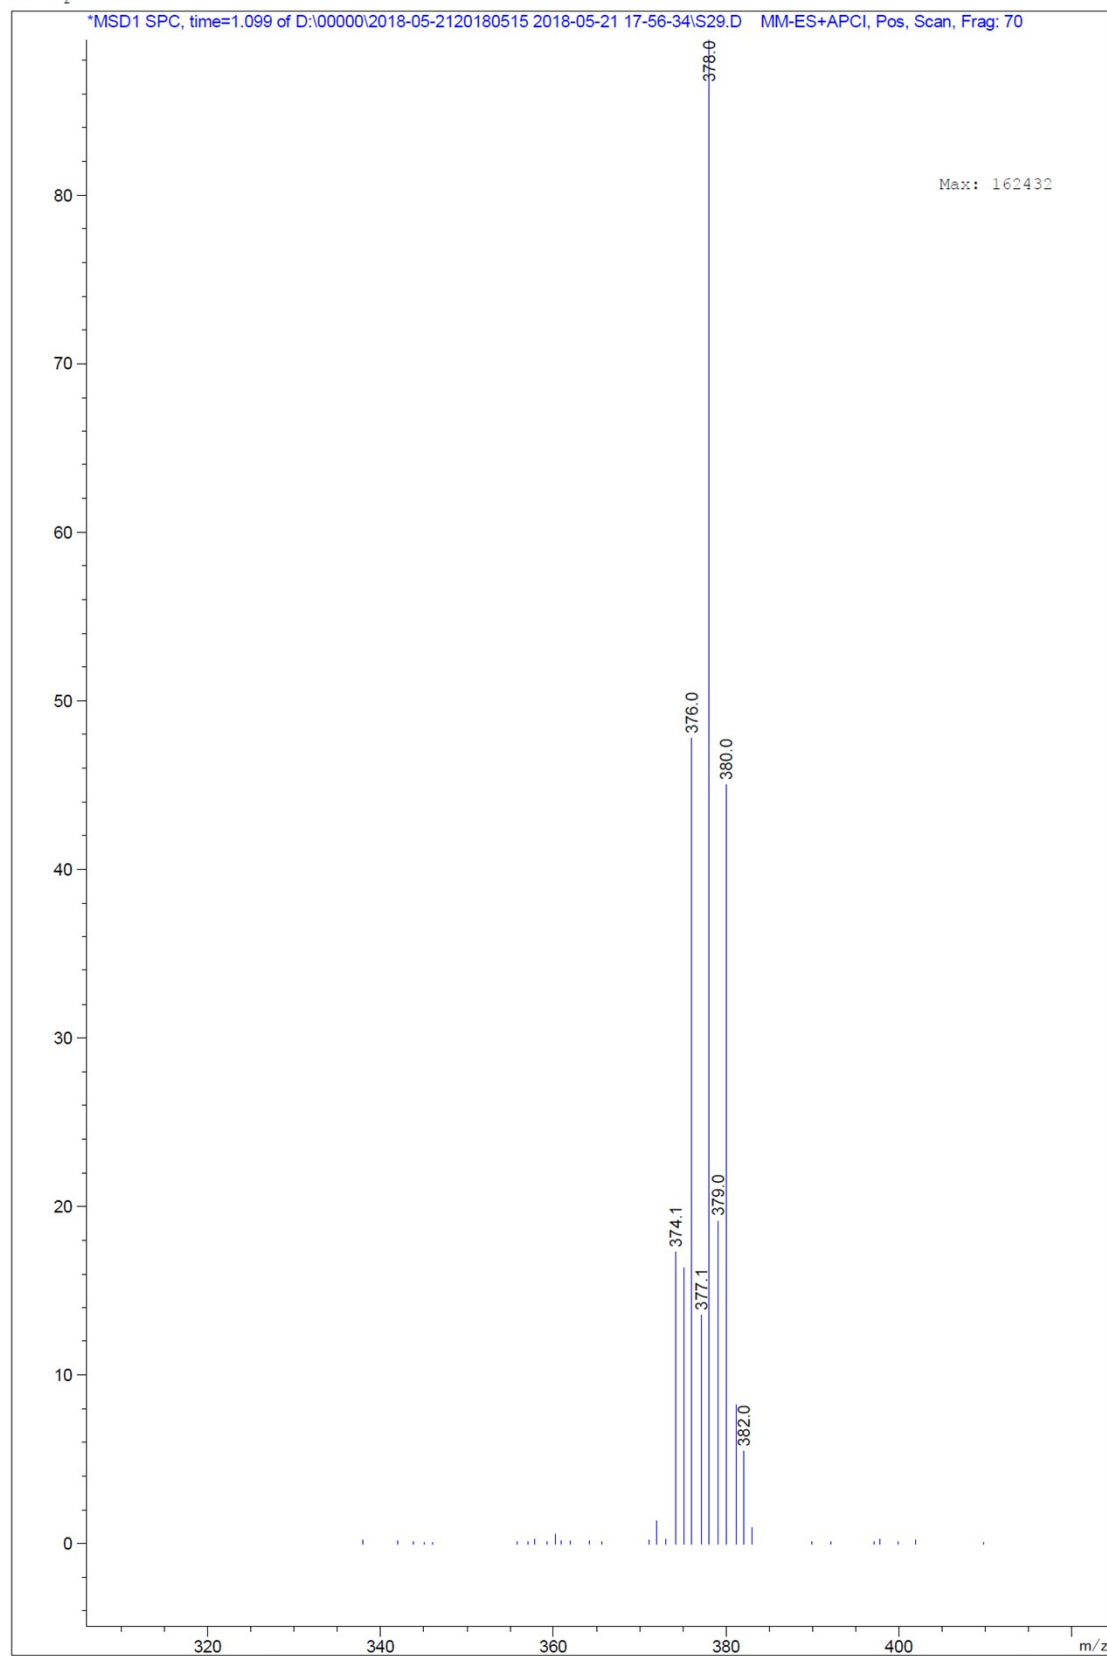

MS of compound **6f**

MS Spectrum

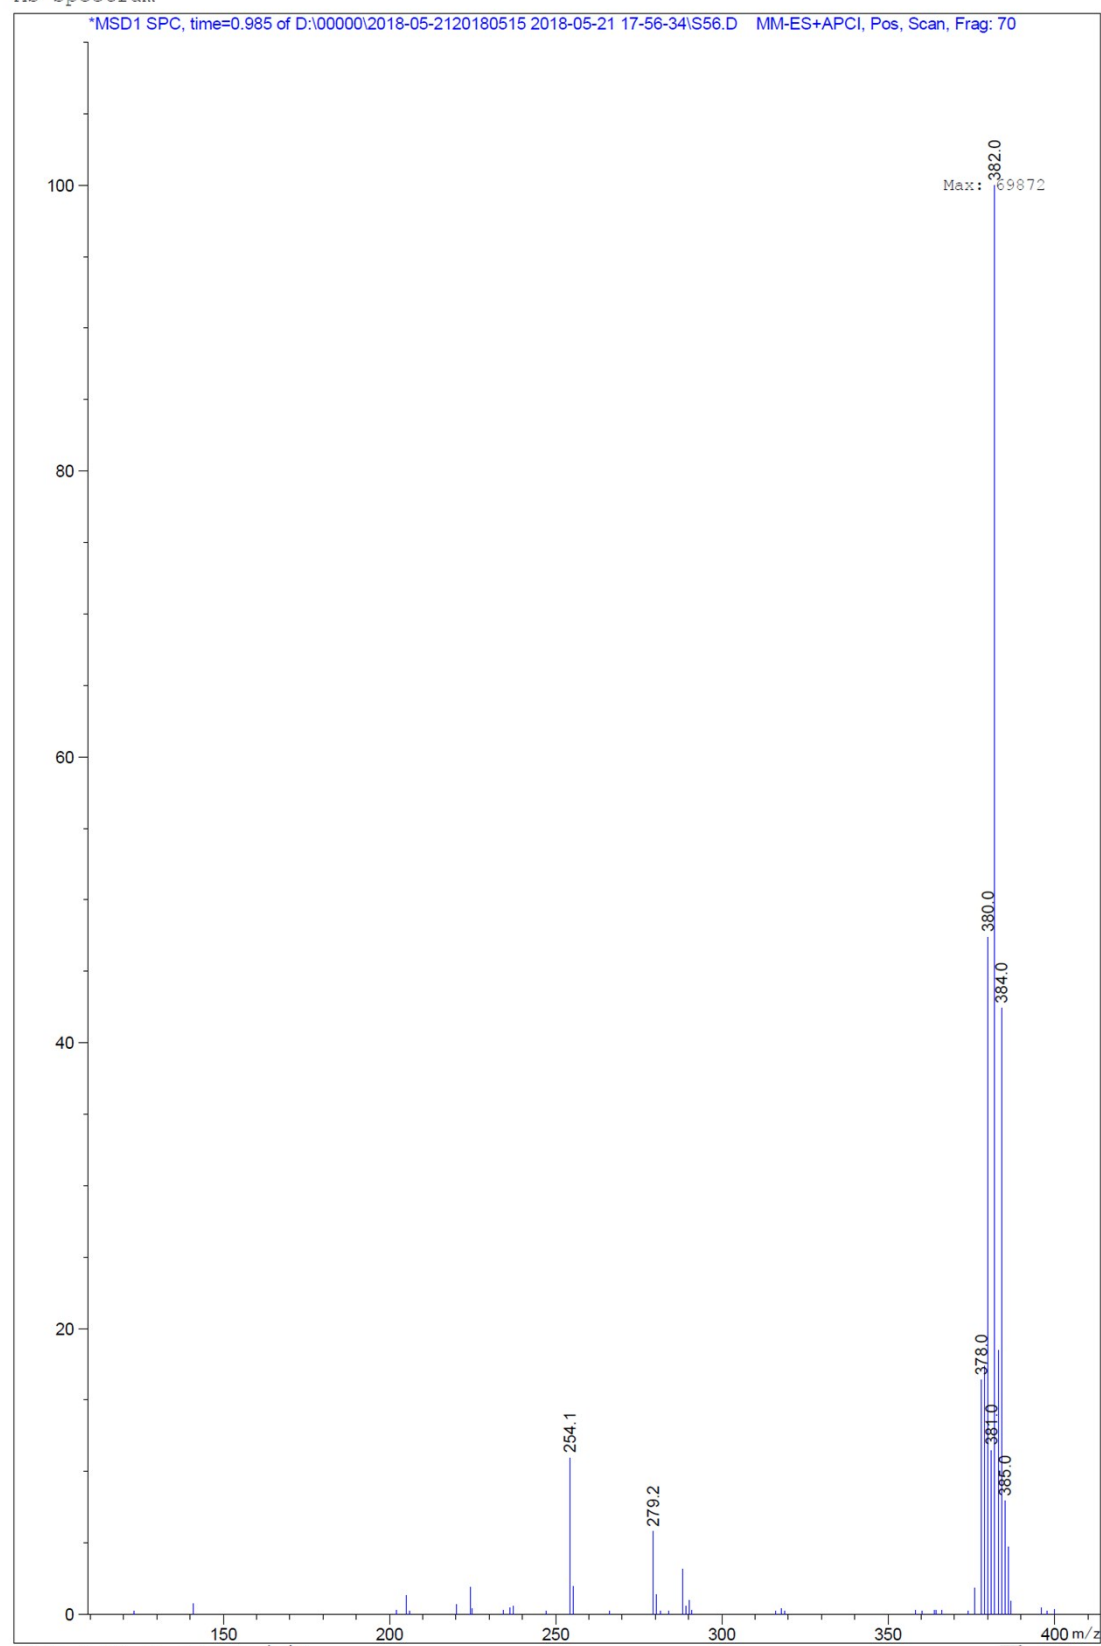

MS of compound **6g**

MS Spectrum

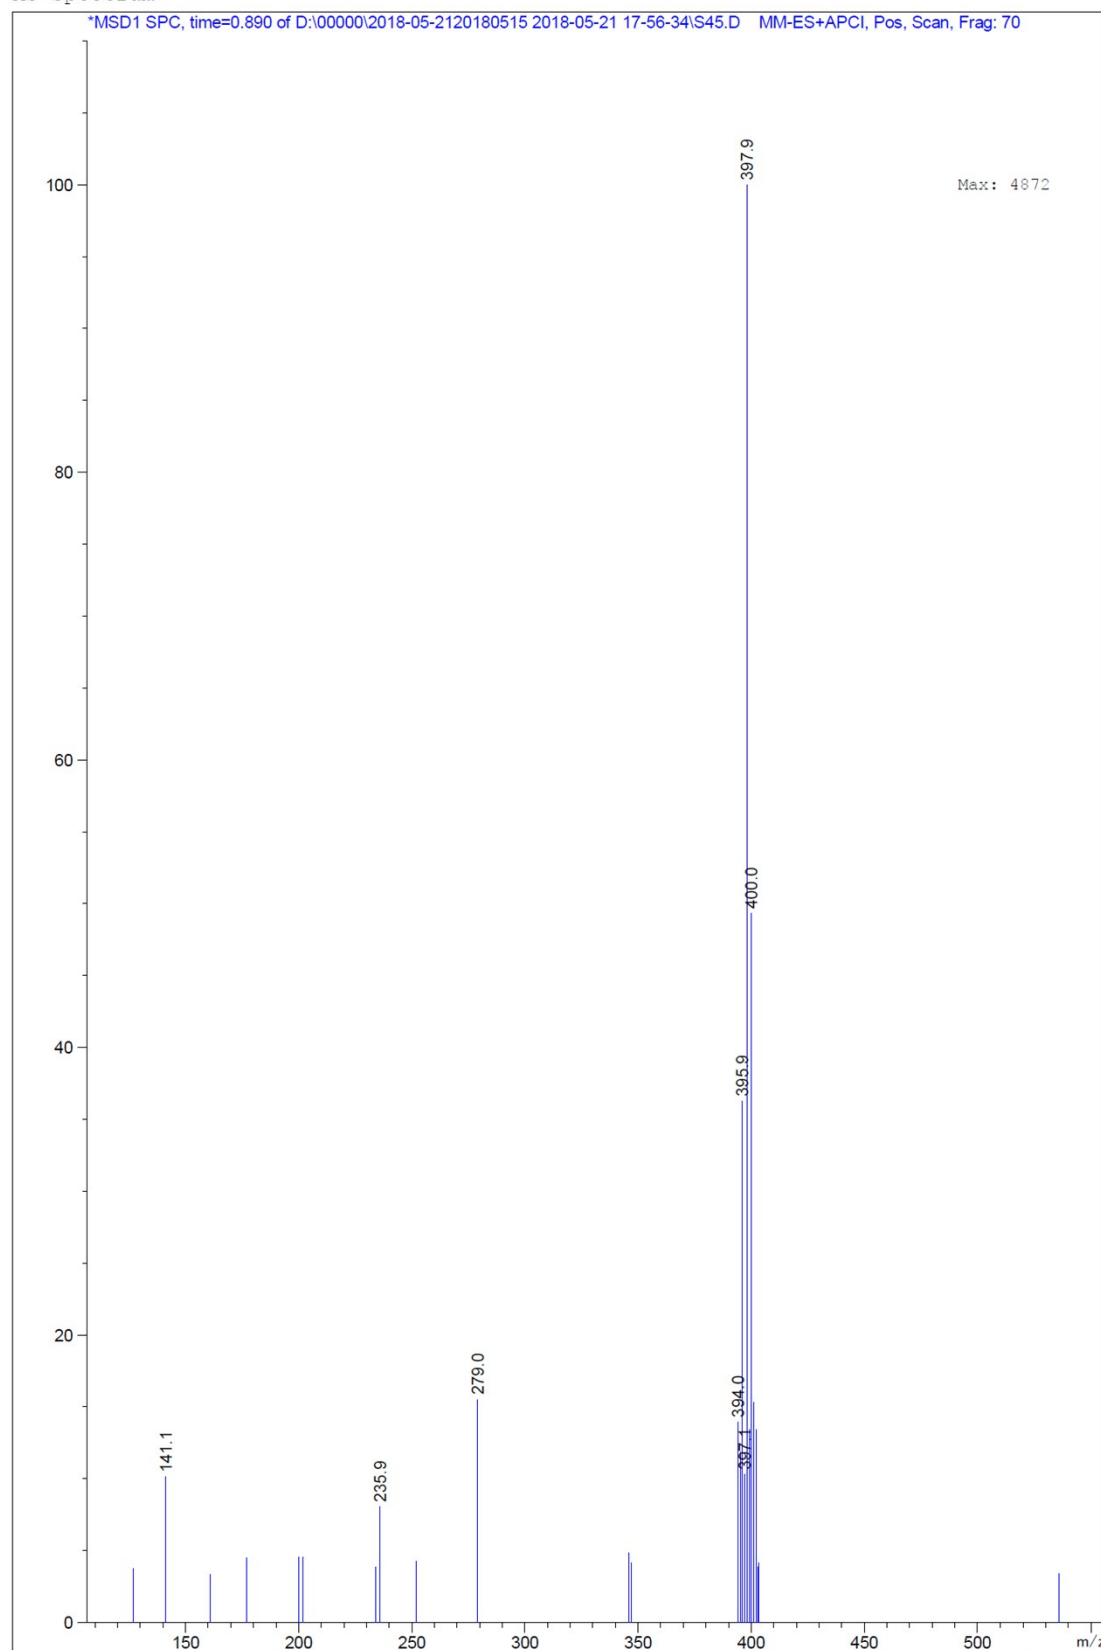

MS of compound 6h

MS Spectrum

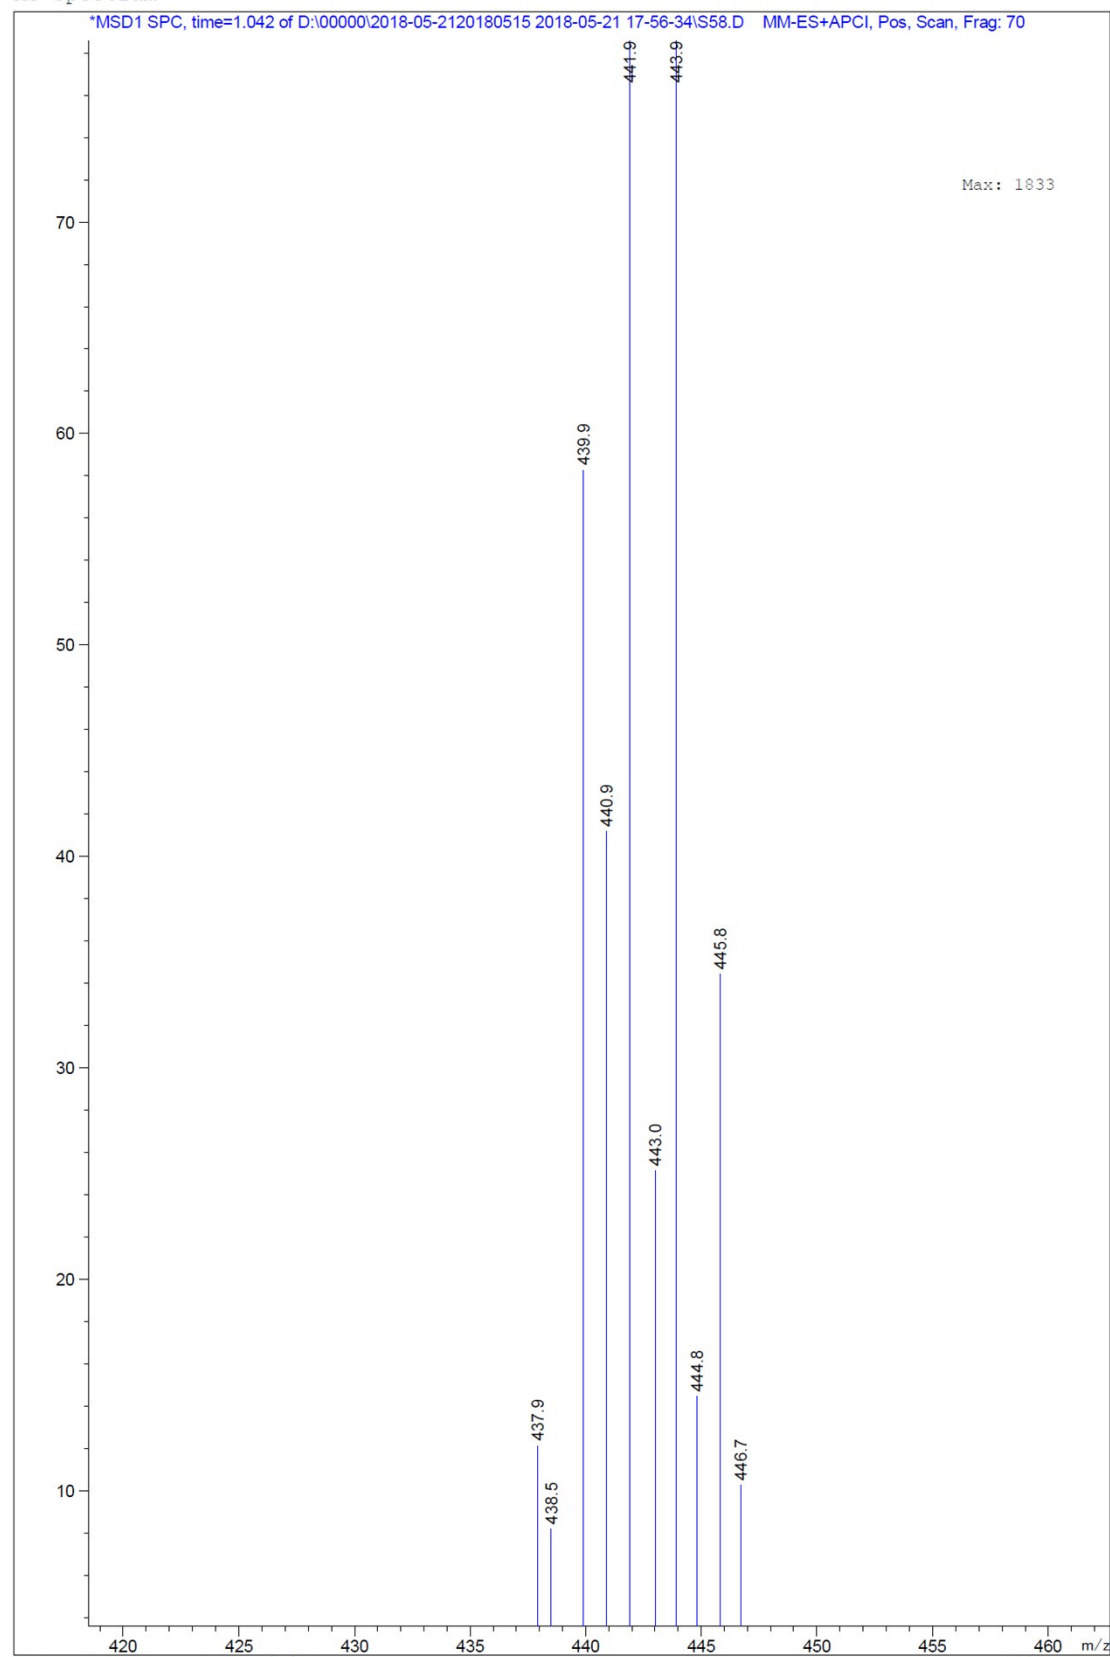

MS of compound 6i

MS Spectrum

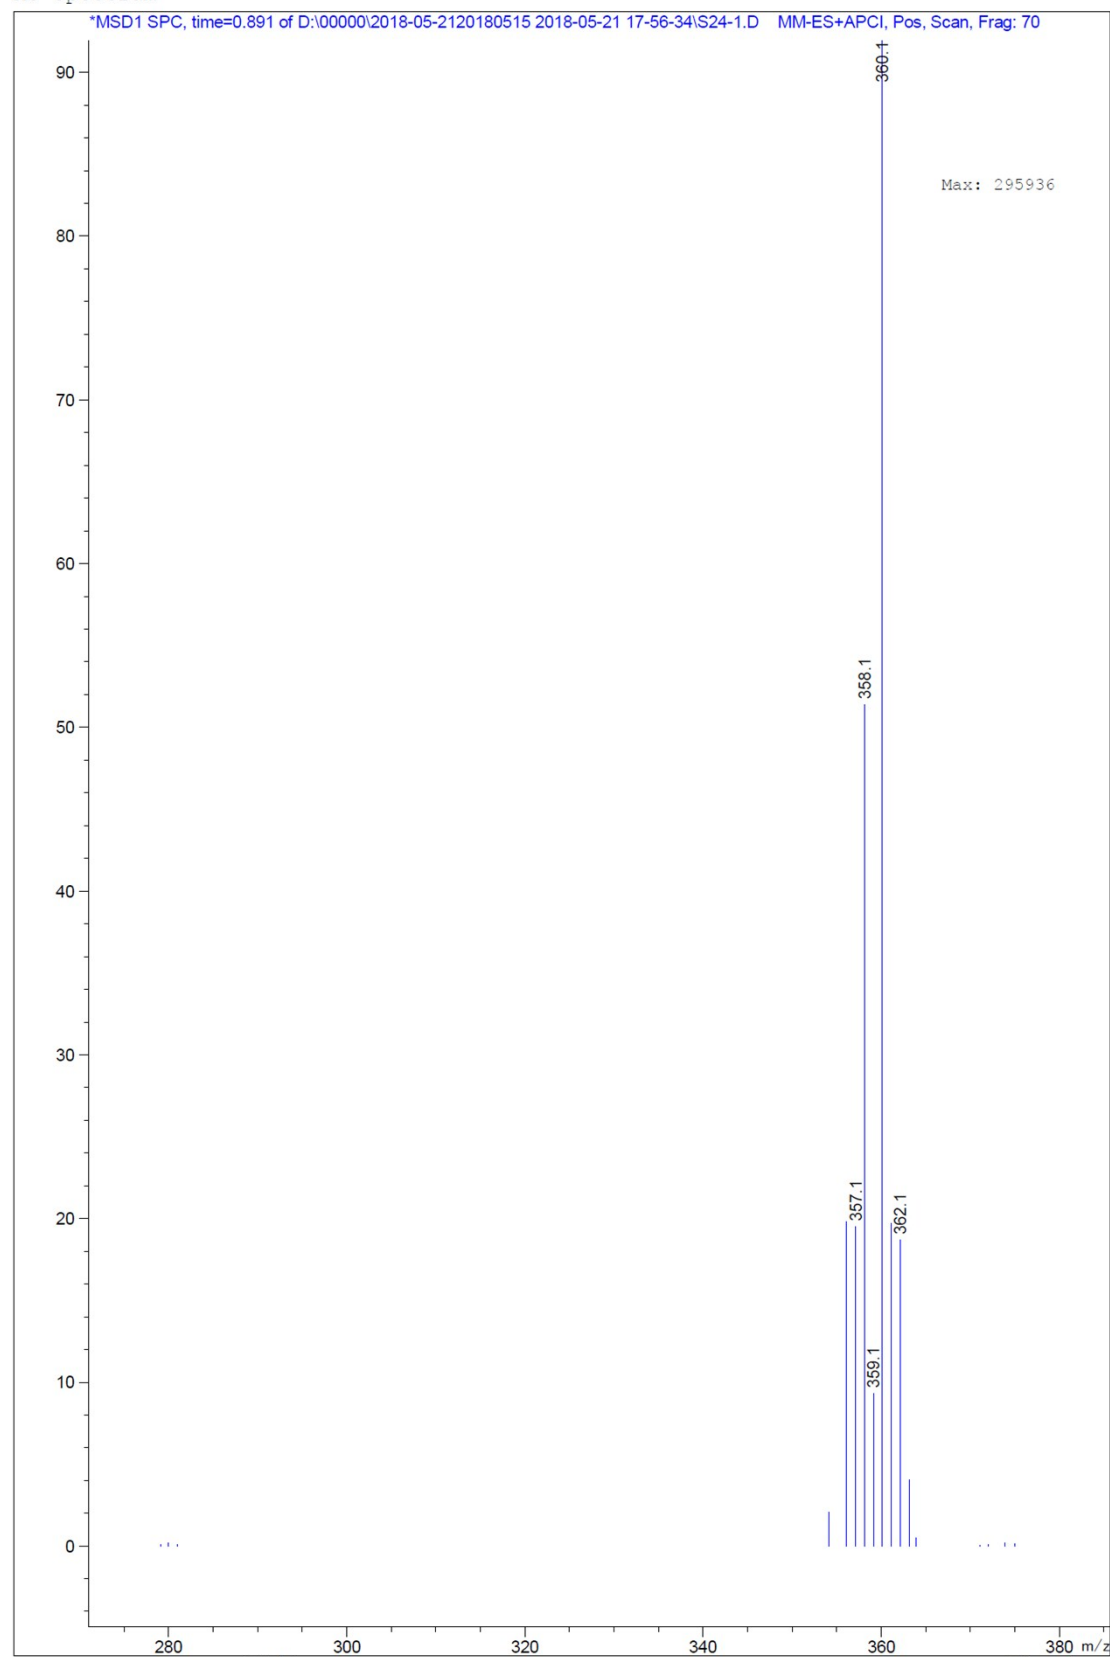

MS of compound **7a**



MS Spectrum

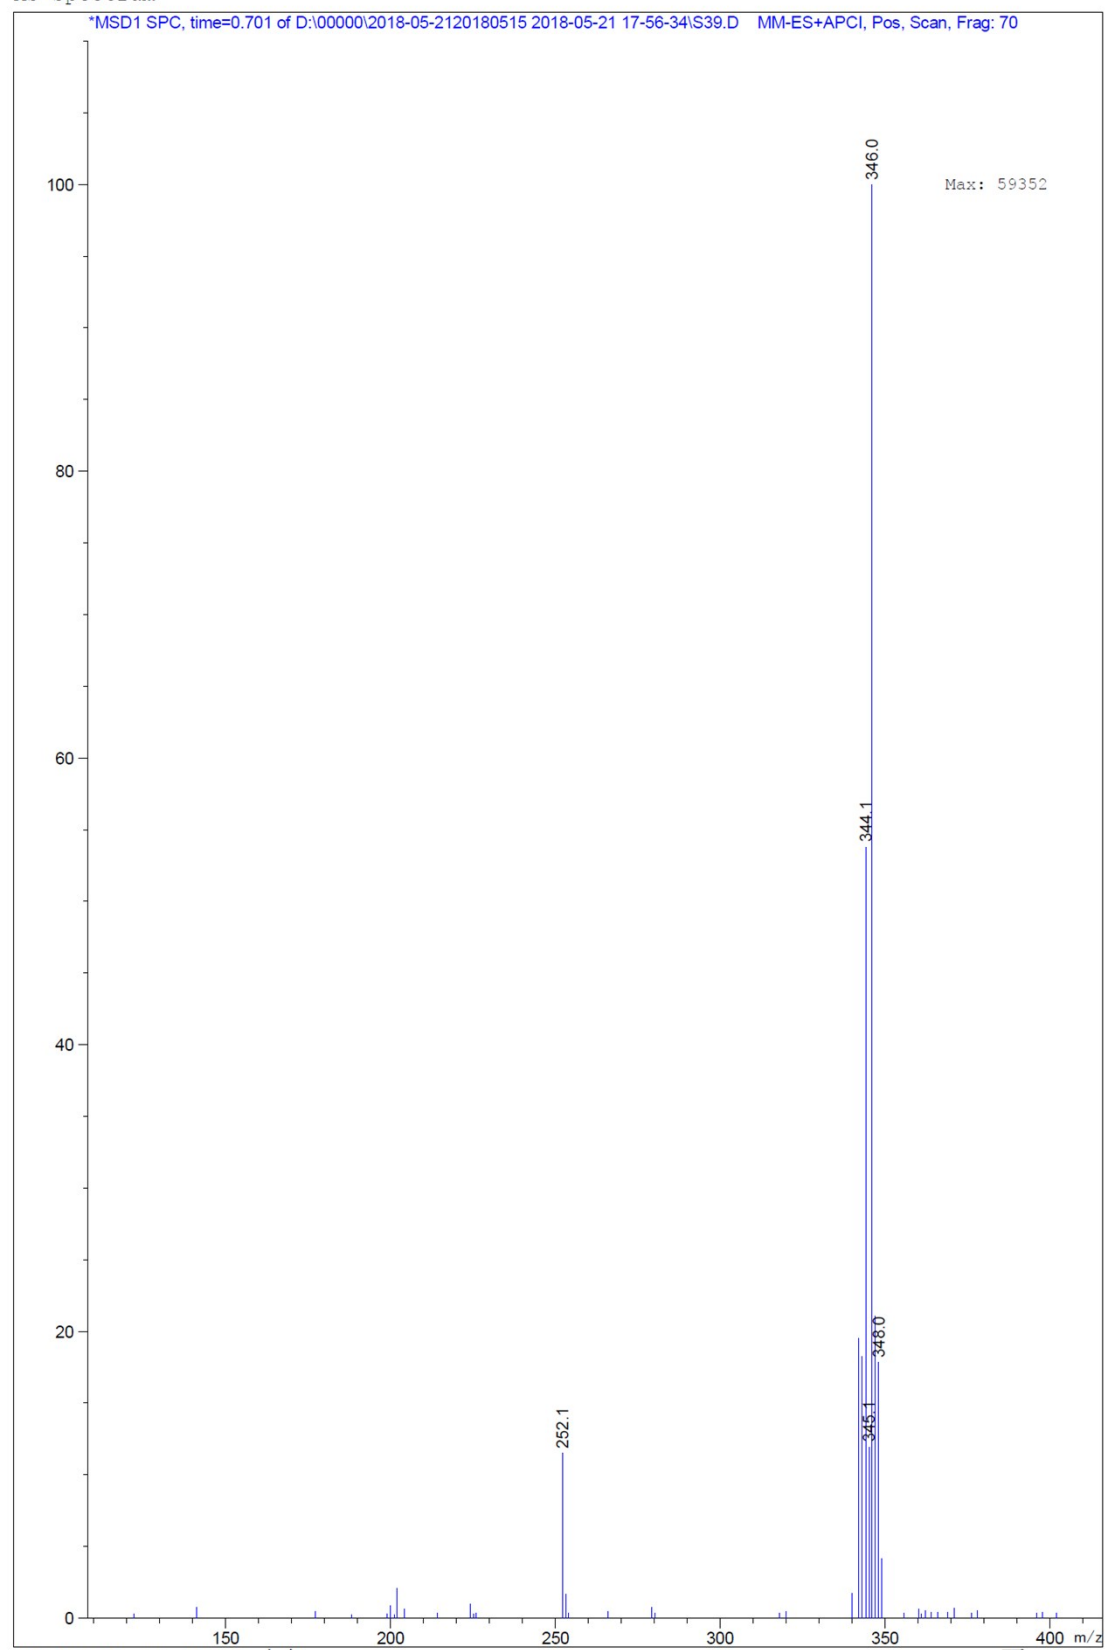

MS of compound 10
